# Supplementary material for: Distribution and drivers of symbiotic and free-living diazotrophic cyanobacteria in the Western Tropical South Pacific
Source: Copernicus journal article supplement (doi:10.5194/bg-2017-63), 2017-03-10
Supplement: Supplementary file 1 [file bg-2017-63-supplement.pdf]

Figure S1a-d. Representative standard curves for qPCR and results from specificity experiments. (a) The standard curve for UCYN-A1 host primers and probes and the cross reactivity when the UCYN-A1 host primers and probes were run with UCYN-A2 host standards as template. (b) The standard curve obtained for het-1 and the cross-reactivity with het-2 assay run in standard and fast modes. (c) The standard curve obtained for UCYN-A1 and the cross-reactivity with UCYN-A2 when the assay is run in fast mode at 60° C and 64°. (d) The standard curve obtained for UCYN-A2 and the cross-reactivity with UCYN-A1 when assay is run in fast mode at 60° C and 64°.

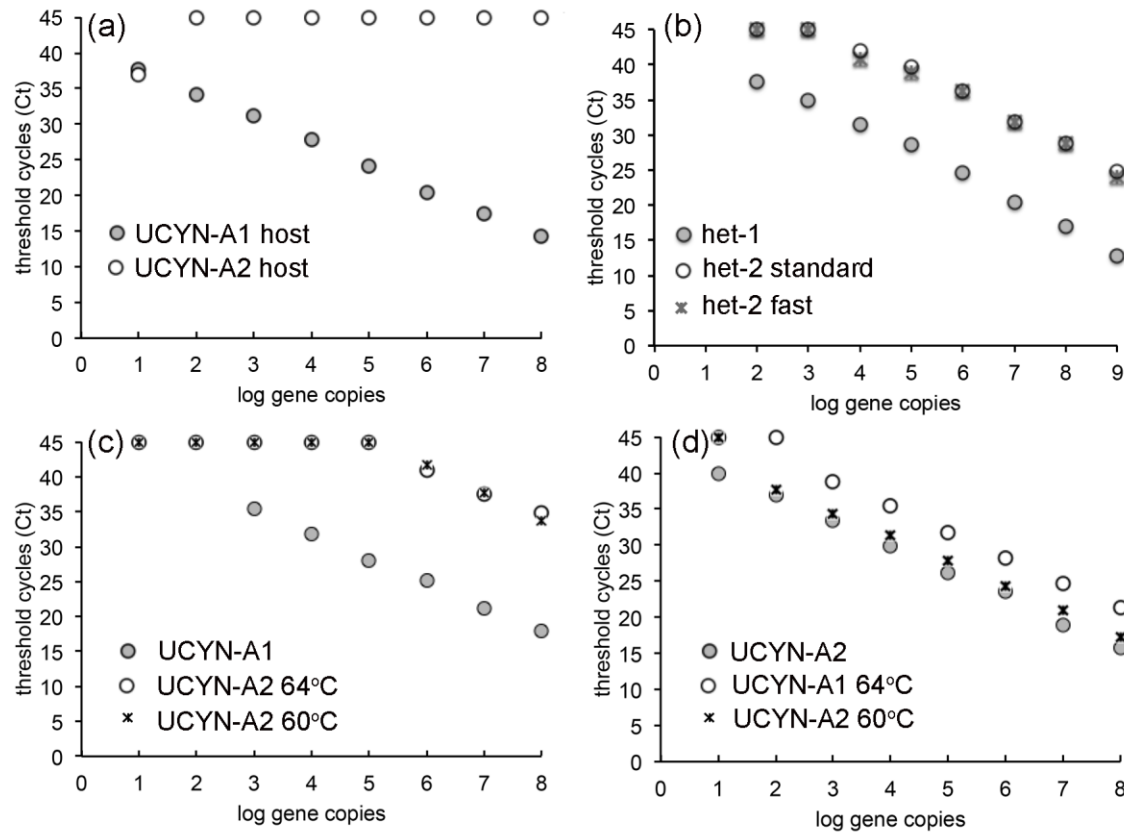

Table S1. Previously and newly designed oligonucleotides used in this study.

| <b>Phylotype</b>     | <b>Forward Primer 5' to 3'</b> | <b>Probe 5' to 3'</b>                | <b>Reverse Primer 5' to 3'</b> | <b>Reference</b>         |
|----------------------|--------------------------------|--------------------------------------|--------------------------------|--------------------------|
| UCYN-A1              | AGCTATAACAACGTTT<br>TATGCGTGA  | TCTGGTGGTCCTGAGCCTGGA                | ACCACGACCAGCAC<br>ATCCA        | Church et al. 2005       |
| UCYN-A2              | GGTTACAACAACGTTT<br>TATGTGTTGA | TCTGGTGGTCCTGAGCCCGGA                | ACCACGACCAGCAC<br>ATCCA        | Thompson et al.<br>2014  |
| UCYN-B               | CGTAATGCTCGAAGGG<br>TTTGA      | TGTGCTGGTCGTGGTAT                    | CACGACCAGCACAA<br>CCAAC        | Moisander et al.<br>2010 |
| het-1                | CGGTTTCCGTGGTGTA<br>CGTT       | TCCGGTGGTCCTGAGCCTGGTGT              | AATACCACGACCCG<br>CACAAC       | Church et al. 2005       |
| het-2                | TGGTTACCGTGATGTA<br>CGTT       | TCTGGTGGTCCTGAGCCTGGTGT              | AATGCCGCGACCAG<br>CACAAC       | Foster et al. 2007       |
| het-3                | CGGTTTCCGTGGCGTA<br>CGTT       | TCTGGTGGTCCAGAACCTGGTGT              | GAGCGGGTGTCGGA<br>GACGGAT      | Foster et al. 2007       |
| <i>Trichodesmium</i> | GACGAAGTATTGAAG<br>CCAGGTTTC   | CATTAAGTGTGTTGAATCTGGTG<br>GTCCTGAGC | CGGCCAGCGCAACC<br>TA           | Church et al. 2005       |
| UCYN-A1 Host         | AGGTTTGCCGGTCTGC<br>CGAT       | CTGGTAGAACTGTCCT                     | GAGCGGGTGTCGGA<br>GACGGAT      | This study               |
| UCYN-A2 Host         | GGTTTTGCCGGTCTGC<br>CGTT       | CTGGTGCGAGCGTCCTTCCT                 | GAGTGGGTGTCGGA<br>GACGGAT      | Thompson et al.<br>2014  |

Table S2. Summary of the comparison between the *nifH* gene copies (L-1) quantified in the ‘at sea’ vs. the lab based qPCR assays. The values from samples, which were at least one order of magnitude greater/lesser, are shown. The corresponding stations, depths (m) and percent of surface irradiance are provided.

| Target   | Station ID | Depth (m)<br>% light   | ‘at sea’<br>quantified <i>nifH</i><br>copies L <sup>-1</sup> | lab quantified<br><i>nifH</i> copies L <sup>-1</sup> |
|----------|------------|------------------------|--------------------------------------------------------------|------------------------------------------------------|
| UCYN-A1  | SD3        | 10% (35)               | 18                                                           | bd                                                   |
|          | SD4        | 54% (10)               | 18                                                           | bd                                                   |
|          |            | 10% (35)               | 7.28 x 10 <sup>5</sup>                                       | 8.82 x 10 <sup>3</sup>                               |
|          | SD8        | 10% (45)               | 5.76 x 10 <sup>4</sup>                                       | 1.38 x 10 <sup>5</sup>                               |
|          | SD9        | 36% (21)               | 23                                                           | 3.29 x 10 <sup>2</sup>                               |
|          |            | 10% (45)               | 5.12 x 10 <sup>2</sup>                                       | 7.62 x 10 <sup>2</sup>                               |
|          | LD B       | 75% (5)                | 17                                                           | bd                                                   |
|          |            | 36% (12)               | 12                                                           | bd                                                   |
|          |            | 10% (27)               | 1.08 x 10 <sup>3</sup>                                       | bd                                                   |
|          | LD C       | 54% (16)               | 18                                                           | bd                                                   |
| 10% (60) |            | 4.68 x 10 <sup>3</sup> | 3.20 x 10 <sup>5</sup>                                       |                                                      |
| UCYN-A2  | SD1        | 10% (35)               | 56                                                           | 1.32 x 10 <sup>2</sup>                               |
|          | SD2        | 10% (36)               | 30                                                           | 1.16 x 10 <sup>2</sup>                               |
|          | SD4        | 10% (35)               | 1.40x10 <sup>4</sup>                                         | 3.41 x 10 <sup>3</sup>                               |
|          | SD7        | 54% (12)               | 3.78x10 <sup>1</sup>                                         | bd                                                   |
|          |            | 36% (21)               | 1.06 x 10 <sup>2</sup>                                       | bd                                                   |
|          | SD8        | 10% (45)               | 2.62 x 10 <sup>2</sup>                                       | 1.52 x 10 <sup>3</sup>                               |
|          | SD9        | 54% (12)               | 43,9                                                         | bd                                                   |
|          | LD B       | 75% (5)                | 63                                                           | bd                                                   |

|               |      |          |                    |                    |
|---------------|------|----------|--------------------|--------------------|
|               |      | 10% (27) | $1.07 \times 10^3$ | bd                 |
|               | LD C | 54% (16) | $3.24 \times 10^2$ | bd                 |
|               |      | 10% (60) | $3.25 \times 10^5$ | $8.54 \times 10^4$ |
| <b>UCYN-B</b> | SD1  | 75% (5)  | bd                 | $4.09 \times 10^5$ |
|               |      | 54% (9)  | bd                 | $1.65 \times 10^5$ |
|               | SD2  | 36% (15) | $6.73 \times 10^5$ | $6.85 \times 10^4$ |
|               | SD3  | 54% (9)  | $7.41 \times 10^3$ | $2.72 \times 10^4$ |
|               |      | 36% (16) | $4.54 \times 10^4$ | $1.35 \times 10^3$ |
|               | SD7  | 10% (45) | $1.81 \times 10^5$ | $7.25 \times 10^4$ |
|               | SD8  | 54% (12) | $1.05 \times 10^4$ | $4.27 \times 10^3$ |
|               |      | 36% (21) | $2.90 \times 10^4$ | $9.11 \times 10^3$ |
|               |      | 10% (45) | $1.01 \times 10^6$ | $1.77 \times 10^5$ |
|               | LD B | 75% (5)  | $1.78 \times 10^4$ | $2.55 \times 10^2$ |
|               |      | 36% (12) | $1.20 \times 10^4$ | $1.35 \times 10^3$ |
|               |      | 10% (27) | $9.60 \times 10^2$ | $1.78 \times 10^3$ |
|               | SD13 | 75% (5)  | $1.01 \times 10^4$ | $9.10 \times 10^3$ |
|               | LD C | 75% (6)  | $4.68 \times 10^2$ | $3.64 \times 10^3$ |
|               | SD15 | 54% (16) | $2.60 \times 10^2$ | bd                 |
|               |      | 10% (58) | $3.23 \times 10^2$ | bd                 |

Table S3. Summary of abundances determined by qPCR. Diazotroph targets are reported as the nifH copies L-1 and UCYN-A hosts are 18S rRNA copies L-1. Results for UCYN-C is limited to the ‘at sea’ qPCR and other targets are from lab-based analyses on archived samples. Samples which were not run on a particular target are designated with a dash (-). The following abbreviations apply: dnq, detected but not quantifiable and bd, below detection are explained in the methods.

| Station | CT D no | Latitude | Longitude | Date (yyyy-mm-dd) | Depth [m] | Trichodesmium [gene copies/l] | UCYN-A1 [gene copies/l] | UCYN-A2 [gene copies/l] | UCYN-B [gene copies/l] | UCYN-C [gene copies/l] | UCYN A1_Host [gene copies/l] | UCYN A2_Host [gene copies/l] | Het-1 [gene copies/l] | Het-2 [gene copies/l] | Het-3 [gene copies/l] |
|---------|---------|----------|-----------|-------------------|-----------|-------------------------------|-------------------------|-------------------------|------------------------|------------------------|------------------------------|------------------------------|-----------------------|-----------------------|-----------------------|
| SD1     | 5       | -17,996  | 159,902   | 2015-02-22        | 0         |                               |                         |                         |                        |                        |                              |                              |                       |                       |                       |
| SD1     | 5       | -17,996  | 159,902   | 2015-02-22        | 5         | 4748503                       | bd                      | bd                      | 409333                 | dnq                    | bd                           | bd                           | 59893                 | 1851                  | 5879                  |
| SD1     | 5       | -17,996  | 159,902   | 2015-02-22        | 9         | 1644396                       | dnq                     | bd                      | 165465                 | bd                     | bd                           | bd                           | 40501                 | 165                   | 4257                  |
| SD1     | 5       | -17,996  | 159,902   | 2015-02-22        | 16        | 2105230                       | dnq                     | dnq                     | 444917                 | bd                     | bd                           | bd                           | 57622                 | 833                   | 3366                  |
| SD1     | 5       | -17,996  | 159,902   | 2015-02-22        | 35        | 664309                        | 796                     | 132                     | 889003                 | dnq                    | bd                           | bd                           | 66297                 | 2502                  | 3324                  |
| SD1     | 5       | -17,996  | 159,902   | 2015-02-22        | 70        | 1533                          | 24839                   | 2463                    | 2150                   |                        | 11521                        | bd                           | bd                    | bd                    | dnq                   |
| SD1     | 5       | -17,996  | 159,902   | 2015-02-22        | 105       |                               | bd                      | bd                      | 534                    |                        | bd                           | bd                           | bd                    | bd                    | bd                    |
| SD2     | 9       | -18,618  | 162,119   | 2015-02-23        | 0         |                               |                         |                         |                        |                        |                              |                              |                       |                       |                       |
| SD2     | 9       | -18,618  | 162,119   | 2015-02-23        | 5         | 321170                        | bd                      | bd                      | 225392                 | 499                    | bd                           | bd                           | 2694                  | 704                   | 181                   |
| SD2     | 9       | -18,618  | 162,119   | 2015-02-23        | 9         | 762749                        | bd                      | bd                      | 139827                 | dnq                    | bd                           | bd                           | 2219                  | 1334                  | 159                   |

|      |    |         |         |            |     |         |      |      |        |     |    |     |        |      |      |
|------|----|---------|---------|------------|-----|---------|------|------|--------|-----|----|-----|--------|------|------|
| SD2  | 9  | -18,618 | 162,119 | 2015-02-23 | 15  |         | bd   | bd   | 68535  | 56  | bd | bd  | 109844 | 1351 | 83   |
| SD2  | 9  | -18,618 | 162,119 | 2015-02-23 | 36  | dnq     | 86   | 116  | 143676 | 227 | bd | bd  | 173847 | 1268 | 126  |
| SD2  | 9  | -18,618 | 162,119 | 2015-02-23 | 70  | 13759   | 3849 | 1124 | 1621   |     | bd | dnq | 6711   | bd   | dnq  |
| SD2  | 9  | -18,618 | 162,119 | 2015-02-23 | 105 | 1882    | dnq  | bd   | 1614   |     | bd | bd  | bd     | bd   | bd   |
| SD3  | 18 | -19,498 | 165,001 | 2015-02-24 | 0   |         |      |      |        |     |    |     |        |      |      |
| SD3  | 18 | -19,498 | 165,001 | 2015-02-24 | 5   | 9413538 | bd   | bd   | 37574  | bd  | bd | bd  | 13299  | 295  | 1936 |
| SD3  | 18 | -19,498 | 165,001 | 2015-02-24 | 9   | 8850345 | bd   | bd   | 27243  | bd  | bd | bd  | 13066  | 4075 | bd   |
| SD3  | 18 | -19,498 | 165,001 | 2015-02-24 | 16  | 9969    | bd   | bd   | 1351   | bd  | bd | bd  | bd     | bd   | bd   |
| SD3  | 18 | -19,498 | 165,001 | 2015-02-24 | 35  |         | dnq  | bd   | 14790  | bd  | bd | bd  | bd     | 3047 | 1443 |
| SD3  | 18 | -19,498 | 165,001 | 2015-02-24 | 70  | 11467   | 242  | bd   | 644    |     | bd | bd  | bd     | bd   | 534  |
| SD3  | 18 | -19,498 | 165,001 | 2015-02-24 | 105 | 11657   | bd   | bd   | 551    |     | bd | bd  | dnq    | bd   | 631  |
| LD A | 24 | -19,212 | 164,688 | 2015-02-26 | 0   |         |      |      |        |     |    |     |        |      |      |
| LD A | 24 | -19,212 | 164,688 | 2015-02-26 | 4   | 65663   | bd   | bd   | dnq    |     | bd | bd  | 3109   | bd   | bd   |
| LD A | 24 | -19,212 | 164,688 | 2015-02-26 | 9   | 1130319 | bd   | bd   | dnq    |     | bd | bd  | bd     | 279  | bd   |
| LD A | 24 | -19,212 | 164,688 | 2015-02-26 | 16  | 776619  | bd   | bd   | dnq    |     | bd | bd  | bd     | bd   | bd   |
| LD A | 24 | -19,212 | 164,688 | 2015-02-26 | 35  | 645191  | bd   | bd   | 110    |     | bd | bd  | bd     | bd   | bd   |

|      |    |         |         |            |     |        |      |      |       |     |    |     |       |      |      |
|------|----|---------|---------|------------|-----|--------|------|------|-------|-----|----|-----|-------|------|------|
| LD A | 24 | -19,212 | 164,688 | 2015-02-26 | 70  | 55635  | bd   | bd   | 240   |     | bd | bd  | bd    | bd   | 369  |
| LD A | 24 | -19,212 | 164,688 | 2015-02-26 | 105 | 5583   | bd   | bd   | dnq   |     | bd | bd  | bd    | bd   | 287  |
| SD4  | 69 | -19,908 | 168,000 | 2015-03-04 | 0   |        |      |      |       |     |    |     |       |      |      |
| SD4  | 69 | -19,908 | 168,000 | 2015-03-04 | 5   | 100275 | 11   | bd   | 374   | bd  | bd | bd  | 27147 | 533  | 75   |
| SD4  | 69 | -19,908 | 168,000 | 2015-03-04 | 10  | 228214 | dnq  | bd   | 513   | 338 | bd | bd  | 39270 | 1389 | 1154 |
| SD4  | 69 | -19,908 | 168,000 | 2015-03-04 | 15  | 437391 | 141  | 13   | 739   | bd  | bd | bd  | 60909 | 3656 | 1875 |
| SD4  | 69 | -19,908 | 168,000 | 2015-03-04 | 35  | 229535 | 8815 | 3413 | 3308  | 257 | bd | 156 | 343   | bd   | 1198 |
| SD4  | 69 | -19,908 | 168,000 | 2015-03-04 | 70  | 4236   | 262  | dnq  | 169   |     | bd | bd  | 363   | dnq  | dnq  |
| SD4  | 69 | -19,908 | 168,000 | 2015-03-04 | 105 | 937    | bd   | bd   | dnq   |     | bd | bd  | dnq   | bd   | bd   |
| SD5  | 73 | -22,001 | 170,000 | 2015-03-05 | 0   | 518768 | dnq  | dnq  | 22819 |     | bd | bd  | 7373  | 527  | 541  |
| SD5  | 73 | -22,001 | 170,000 | 2015-03-05 | 5   | 420203 | dnq  | bd   | 7465  |     | bd | bd  | 3378  | 241  | 65   |
| SD5  | 73 | -22,001 | 170,000 | 2015-03-05 | 10  | 895098 | 0    | bd   | 18993 |     | bd | bd  | 4016  | 1659 | 187  |
| SD5  | 73 | -22,001 | 170,000 | 2015-03-05 | 16  | 740172 | 0    | bd   | 8751  |     | bd | bd  | 7990  | 921  | 617  |
| SD5  | 73 | -22,001 | 170,000 | 2015-03-05 | 35  | 346365 | 845  | 124  | 6799  |     | bd | 21  | 4468  | 414  | 1252 |
| SD5  | 73 | -22,001 | 170,000 | 2015-03-05 | 70  | 6679   | dnq  | bd   | 589   |     | bd | bd  | 665   | dnq  | 382  |
| SD5  | 73 | -22,001 | 170,000 | 2015-03-05 | 105 | dnq    | 37   | dnq  | 477   |     | bd | bd  | bd    | bd   | bd   |

|     |    |         |         |            |     |             |       |      |             |     |      |     |       |      |      |
|-----|----|---------|---------|------------|-----|-------------|-------|------|-------------|-----|------|-----|-------|------|------|
| SD6 | 77 | -21,368 | 172,135 | 2015-03-06 | 0   | 268530      | bd    | bd   | 2166<br>610 |     | bd   | bd  | 10348 | 373  | bd   |
| SD6 | 77 | -21,368 | 172,135 | 2015-03-06 | 5   | 655528      | bd    | bd   | 1167<br>444 |     | bd   | bd  | 6172  | 157  | 46   |
| SD6 | 77 | -21,368 | 172,135 | 2015-03-06 | 10  | 502044      | dnq   | bd   | 1966<br>461 |     | bd   | bd  | 5798  | 853  | 167  |
| SD6 | 77 | -21,368 | 172,135 | 2015-03-06 | 16  | 69929       | 8     | dnq  | 2337<br>849 |     | bd   | bd  | 1887  | 187  | 446  |
| SD6 | 77 | -21,368 | 172,135 | 2015-03-06 | 35  | 36042       | 1736  | 794  | 2410<br>49  |     | bd   | 23  | 3057  | 204  | 599  |
| SD6 | 77 | -21,368 | 172,135 | 2015-03-06 | 70  | 5734        | 37554 | 2630 | 3571        |     | 3953 | dnq | 358   | dnq  | 320  |
| SD6 | 77 | -21,368 | 172,135 | 2015-03-06 | 105 | 415         | dnq   | dnq  | 3215        |     | bd   | bd  | 239   | dnq  | 170  |
| SD7 | 81 | -20,732 | 174,266 | 2015-03-07 | 0   | 276241      | bd    | bd   | 2783<br>686 |     | bd   | bd  | 21030 | 857  | 1253 |
| SD7 | 81 | -20,732 | 174,266 | 2015-03-07 | 5   | 302432      | bd    | bd   | 1578<br>780 | bd  | bd   | bd  | 23420 | 554  | dnq  |
| SD7 | 81 | -20,732 | 174,266 | 2015-03-07 | 12  | 370068      | bd    | bd   | 2369<br>016 | bd  | bd   | bd  | 30172 | 1559 | 329  |
| SD7 | 81 | -20,732 | 174,266 | 2015-03-07 | 21  | 57984       | bd    | bd   | 2908<br>78  | dnq | bd   | bd  | 6932  | 507  | 106  |
| SD7 | 81 | -20,732 | 174,266 | 2015-03-07 | 45  | 17829       | 1952  | 535  | 7252<br>3   | dnq | bd   | dnq | 4976  | 324  | 128  |
| SD7 | 81 | -20,732 | 174,266 | 2015-03-07 | 90  | 1590        | 187   | 14   | 1431        |     | bd   | bd  | dnq   | bd   | 94   |
| SD7 | 81 | -20,732 | 174,266 | 2015-03-07 | 119 | 218         | bd    | bd   | 1062        |     | bd   | bd  | bd    | bd   | bd   |
| SD8 | 85 | -20,695 | 176,397 | 2015-03-08 | 0   | dnq         | 152   | bd   | 8268        |     | bd   | bd  | 16132 | bd   | bd   |
| SD8 | 85 | -20,695 | 176,397 | 2015-03-08 | 4   | 358583<br>4 | dnq   | bd   | 2910        | bd  | bd   | bd  | 8578  | bd   | bd   |



|      |    |         |          |            |     |         |        |      |        |     |       |     |       |       |      |
|------|----|---------|----------|------------|-----|---------|--------|------|--------|-----|-------|-----|-------|-------|------|
| SD8  | 85 | -20,695 | 176,397  | 2015-03-08 | 12  | 1946086 | dnq    | bd   | 4267   | bd  | bd    | bd  | 11183 | bd    | bd   |
| SD8  | 85 | -20,695 | 176,397  | 2015-03-08 | 21  | 282654  | 797    | dnq  | 9113   | bd  | bd    | bd  | 851   | 873   | bd   |
| SD8  | 85 | -20,695 | 176,397  | 2015-03-08 | 45  | 193405  | 138058 | 1516 | 176758 | dnq | 11367 | dnq | dnq   | 1100  | dnq  |
| SD8  | 85 | -20,695 | 176,397  | 2015-03-08 | 90  | 5878    | 11315  | 96   | 852    |     | dnq   | bd  | bd    | bd    | bd   |
| SD8  | 85 | -20,695 | 176,397  | 2015-03-08 | 135 | 1306    | bd     | bd   | 306    |     | bd    | bd  | bd    | bd    | bd   |
| SD9  | 89 | -20,966 | 178,643  | 2015-03-09 | 0   |         | 120    | dnq  | 163654 |     | bd    | bd  | 15950 | 1876  | bd   |
| SD9  | 89 | -20,966 | 178,643  | 2015-03-09 | 5   |         | 49     | dnq  | 160221 | 66  | bd    |     | 24506 | 3672  | 357  |
| SD9  | 89 | -20,966 | 178,643  | 2015-03-09 | 12  |         | 56     | dnq  | 227332 | bd  | bd    | bd  | 29668 | 3886  | 2026 |
| SD9  | 89 | -20,966 | 178,643  | 2015-03-09 | 21  |         | 329    | 30   | 127739 | bd  | bd    | bd  | 34626 | 28861 | 4694 |
| SD9  | 89 | -20,966 | 178,643  | 2015-03-09 | 45  |         | 7617   | 1283 | 163509 | dnq | bd    | bd  | 5467  | 1802  | dnq  |
| SD9  | 89 | -20,966 | 178,643  | 2015-03-09 | 90  |         | 2249   | 242  | 5010   |     | bd    |     | dnq   | dnq   | bd   |
| SD9  | 89 | -20,966 | 178,643  | 2015-03-09 | 131 |         | dnq    | 301  | 2120   |     | bd    | bd  | dnq   | bd    | bd   |
| SD10 | 93 | -20,448 | -178,513 | 2015-03-10 | 0   | 910515  | bd     | bd   | 1138   |     | bd    | bd  | 4910  | 856   | 131  |
| SD10 | 93 | -20,448 | -178,513 | 2015-03-10 | 5   | 903433  | bd     | bd   | 761    |     | bd    | bd  | 7412  | 7926  | 481  |
| SD10 | 93 | -20,448 | -178,513 | 2015-03-10 | 12  | 711040  | bd     | bd   | 1055   |     | bd    | bd  | 13656 | 3742  | 1413 |
| SD10 | 93 | -20,448 | -178,513 | 2015-03-10 | 21  | 397017  | bd     | bd   | 712    |     | bd    | bd  | 7930  | 1789  | 3188 |

|          |     |         |              |                |     |        |       |      |            |  |      |     |      |     |     |
|----------|-----|---------|--------------|----------------|-----|--------|-------|------|------------|--|------|-----|------|-----|-----|
| SD1<br>0 | 93  | -20,448 | -<br>178,513 | 2015-<br>03-10 | 45  | 127081 | 1658  | 122  | 1842<br>2  |  | bd   | bd  | 834  | bd  | 797 |
| SD1<br>0 | 93  | -20,448 | -<br>178,513 | 2015-<br>03-10 | 90  | 975    | 1502  | 130  | 315        |  | bd   | bd  | bd   | bd  | bd  |
| SD1<br>0 | 93  | -20,448 | -<br>178,513 | 2015-<br>03-10 | 133 | dnq    | dnq   | dnq  | 281        |  | bd   | bd  | 346  | bd  | bd  |
| SD1<br>1 | 97  | -19,986 | -<br>175,667 | 2015-<br>03-11 | 0   | 170749 | bd    | bd   | 1304<br>3  |  | bd   | bd  | dnq  | 178 | bd  |
| SD1<br>1 | 97  | -19,986 | -<br>175,667 | 2015-<br>03-11 | 5   | 508743 | dnq   | dnq  | 3290<br>5  |  | bd   | bd  | 6441 | 406 | bd  |
| SD1<br>1 | 97  | -19,986 | -<br>175,667 | 2015-<br>03-11 | 12  | 267357 | dnq   | dnq  | 1023<br>6  |  | bd   | bd  | 663  | 368 | bd  |
| SD1<br>1 | 97  | -19,986 | -<br>175,667 | 2015-<br>03-11 | 21  | 350025 | 20    | bd   | 3440<br>8  |  | bd   | bd  | bd   | dnq | bd  |
| SD1<br>1 | 97  | -19,986 | -<br>175,667 | 2015-<br>03-11 | 44  | 28957  | 479   | 29   | 1065<br>65 |  | bd   | bd  | 1857 | bd  | bd  |
| SD1<br>1 | 97  | -19,986 | -<br>175,667 | 2015-<br>03-11 | 90  | 309    | 493   | 53   | 266        |  | bd   | bd  | 3221 | bd  | 153 |
| SD1<br>1 | 97  | -19,986 | -<br>175,667 | 2015-<br>03-11 | 135 | 552    | bd    | bd   | 192        |  | bd   | bd  | bd   | bd  | bd  |
| SD1<br>2 | 101 | -19,503 | -<br>172,798 | 2015-<br>03-12 | 0   | 129711 | bd    | bd   | 1150<br>87 |  | bd   | bd  | bd   | bd  | bd  |
| SD1<br>2 | 101 | -19,503 | -<br>172,798 | 2015-<br>03-12 | 4   | 72883  | dnq   | dnq  | 1298<br>95 |  | bd   | bd  | bd   | bd  | bd  |
| SD1<br>2 | 101 | -19,503 | -<br>172,798 | 2015-<br>03-12 | 11  | 175793 | dnq   | bd   | 1087<br>98 |  | bd   | bd  | 735  | dnq | bd  |
| SD1<br>2 | 101 | -19,503 | -<br>172,798 | 2015-<br>03-12 | 19  | 459153 | 41    | bd   | 3774<br>66 |  | bd   | bd  | bd   | 191 | bd  |
| SD1<br>2 | 101 | -19,503 | -<br>172,798 | 2015-<br>03-12 | 45  | 294698 | 31279 | 5136 | 2127<br>07 |  | 2233 | 497 | 1091 | dnq | bd  |
| SD1<br>2 | 101 | -19,503 | -<br>172,798 | 2015-<br>03-12 | 85  | dnq    | 108   | dnq  | 315        |  | bd   | bd  | bd   | bd  | dnq |

|          |     |         |              |                |     |        |     |     |           |    |    |     |      |     |     |
|----------|-----|---------|--------------|----------------|-----|--------|-----|-----|-----------|----|----|-----|------|-----|-----|
| SD1<br>2 | 101 | -19,503 | -<br>172,798 | 2015-<br>03-12 | 128 | dnq    | dnq | dnq | 211       |    | bd | bd  | dnq  | bd  | bd  |
| LD<br>B  | 106 | -18,241 | -<br>170,857 | 2015-<br>03-15 | 0   | 288955 | bd  | bd  | 576       |    | bd | bd  | 406  | 18  | dnq |
| LD<br>B  | 106 | -18,241 | -<br>170,857 | 2015-<br>03-15 | 5   | 189366 | bd  | bd  | 255       | bd | bd | bd  | 404  | dnq | dnq |
| LD<br>B  | 106 | -18,241 | -<br>170,857 | 2015-<br>03-15 | 7   | 292950 | bd  | bd  | 1349      | bd | bd | bd  | 585  | dnq | dnq |
| LD<br>B  | 106 | -18,241 | -<br>170,857 | 2015-<br>03-15 | 12  | 493288 | bd  | bd  | 1528      | bd | bd | bd  | 823  | dnq | dnq |
| LD<br>B  | 106 | -18,241 | -<br>170,857 | 2015-<br>03-15 | 27  | 502542 | bd  | bd  | 1781      | bd | bd | bd  | 4234 | 41  | bd  |
| LD<br>B  | 106 | -18,241 | -<br>170,857 | 2015-<br>03-15 | 56  | 10461  | 12  | dnq | 126       |    | bd | bd  | 14   | bd  | bd  |
| LD<br>B  | 106 | -18,241 | -<br>170,857 | 2015-<br>03-15 | 82  | 683    | bd  | bd  | 111       |    | bd | bd  | bd   | bd  | bd  |
| SD1<br>3 | 152 | -18,199 | -<br>169,073 | 2015-<br>03-21 | 0   |        |     |     |           |    |    |     |      |     |     |
| SD1<br>3 | 152 | -18,199 | -<br>169,073 | 2015-<br>03-21 | 5   | 6409   | bd  | bd  | 9095      | bd | bd | bd  | dnq  | dnq | bd  |
| SD1<br>3 | 152 | -18,199 | -<br>169,073 | 2015-<br>03-21 | 15  | 51425  | bd  | bd  | 1964<br>9 | bd | bd | bd  | dnq  | bd  | bd  |
| SD1<br>3 | 152 | -18,199 | -<br>169,073 | 2015-<br>03-21 | 25  | 14177  | bd  | bd  | 9236      | bd | bd | bd  | bd   | bd  | bd  |
| SD1<br>3 | 152 | -18,199 | -<br>169,073 | 2015-<br>03-21 | 45  | bd     | bd  | bd  | 328       | bd | bd | dnq | 38   | bd  | bd  |
| SD1<br>3 | 152 | -18,199 | -<br>169,073 | 2015-<br>03-21 | 65  | bd     | bd  | bd  | 182       |    | bd | bd  | bd   | bd  | bd  |
| SD1<br>3 | 152 | -18,199 | -<br>169,073 | 2015-<br>03-21 | 85  | dnq    | bd  | bd  | 181       |    | bd | bd  | 76   | bd  | bd  |
| LD<br>C  | 160 | -18,427 | -<br>165,923 | 2015-<br>03-23 | 0   | dnq    | dnq | bd  | 4203      |    | bd | bd  | 3877 | 181 | 168 |

|          |     |         |              |                |     |     |       |       |            |    |      |      |      |     |      |
|----------|-----|---------|--------------|----------------|-----|-----|-------|-------|------------|----|------|------|------|-----|------|
| LD<br>C  | 160 | -18,427 | -<br>165,923 | 2015-<br>03-23 | 6   | dnq | bd    | bd    | 3643       | bd | bd   | bd   | 2997 | 872 | 307  |
| LD<br>C  | 160 | -18,427 | -<br>165,923 | 2015-<br>03-23 | 16  | dnq | bd    | bd    | 1757       | bd | bd   | bd   | 6349 | 471 | 1006 |
| LD<br>C  | 160 | -18,427 | -<br>165,923 | 2015-<br>03-23 | 27  | dnq | dnq   | dnq   | 1951       | bd | bd   | bd   | 3366 | 204 | 2032 |
| LD<br>C  | 160 | -18,427 | -<br>165,923 | 2015-<br>03-23 | 60  | 743 | 31978 | 85336 | 5785<br>49 | bd | 6187 | 3358 | 421  | dnq | 625  |
| LD<br>C  | 160 | -18,427 | -<br>165,923 | 2015-<br>03-23 | 120 |     | dnq   | bd    | 338        |    | bd   | bd   | bd   | bd  | bd   |
| LD<br>C  | 160 | -18,427 | -<br>165,923 | 2015-<br>03-23 | 180 |     | bd    | bd    | dnq        |    | bd   | bd   | bd   | bd  | bd   |
| SD1<br>4 | 208 | -18,409 | -<br>162,998 | 2015-<br>03-29 | 0   | bd  | bd    | bd    | 349        |    | bd   | bd   | dnq  | bd  | bd   |
| SD1<br>4 | 208 | -18,409 | -<br>162,998 | 2015-<br>03-29 | 5   | bd  | bd    | bd    | bd         |    | bd   | bd   | bd   | bd  | bd   |
| SD1<br>4 | 208 | -18,409 | -<br>162,998 | 2015-<br>03-29 | 15  | bd  | bd    | bd    | dnq        |    | bd   | bd   | dnq  | bd  | bd   |
| SD1<br>4 | 208 | -18,409 | -<br>162,998 | 2015-<br>03-29 | 25  | dnq | bd    | bd    | 247        |    | bd   | bd   | bd   | dnq | bd   |
| SD1<br>4 | 208 | -18,409 | -<br>162,998 | 2015-<br>03-29 | 56  | bd  | bd    | bd    | dnq        |    | bd   | bd   | 28   | dnq | bd   |
| SD1<br>4 | 208 | -18,409 | -<br>162,998 | 2015-<br>03-29 | 110 | bd  | bd    | bd    | 183        |    | bd   | bd   | 106  | dnq | bd   |
| SD1<br>4 | 208 | -18,409 | -<br>162,998 | 2015-<br>03-29 | 165 | bd  | bd    | bd    | dnq        |    | bd   | bd   | bd   | bd  | bd   |
| SD1<br>5 | 211 | -18,267 | -<br>160,000 | 2015-<br>03-30 | 0   | bd  | bd    | bd    | 180        |    | bd   | bd   | bd   | bd  | bd   |
| SD1<br>5 | 211 | -18,267 | -<br>160,000 | 2015-<br>03-30 | 6   | dnq | bd    | bd    | 122        | bd | bd   | bd   | bd   | bd  | bd   |
| SD1<br>5 | 211 | -18,267 | -<br>160,000 | 2015-<br>03-30 | 16  | bd  | bd    | bd    | dnq        | bd | bd   | bd   | bd   | bd  | bd   |

|          |     |         |              |                |     |                               |            |                     |     |    |    |    |                 |      |                 |
|----------|-----|---------|--------------|----------------|-----|-------------------------------|------------|---------------------|-----|----|----|----|-----------------|------|-----------------|
| SD1<br>5 | 211 | -18,267 | -<br>160,000 | 2015-<br>03-30 | 26  | dnq                           | bd         | bd                  | 470 | bd | bd | bd | bd              | bd   | bd              |
| SD1<br>5 | 211 | -18,267 | -<br>160,000 | 2015-<br>03-30 | 58  | bd                            | bd         | bd                  | dnq | bd | bd | bd | bd              | bd   | bd              |
| SD1<br>5 | 211 | -18,267 | -<br>160,000 | 2015-<br>03-30 | 116 | bd                            | bd         | bd                  | dnq |    | bd | bd | bd              | bd   | bd              |
| SD1<br>5 | 211 | -18,267 | -<br>160,000 | 2015-<br>03-30 | 174 | bd                            | bd         | bd                  | dnq |    | bd | bd | bd              | bd   | bd              |
|          |     |         |              |                |     |                               |            |                     |     |    |    |    |                 |      |                 |
|          |     |         |              |                |     | bd                            | 84         | 97                  |     |    |    |    | 49              | 69   | 71              |
|          |     |         |              |                |     | total                         | 120        | 120                 |     |    |    |    | 120             | 120  | 120             |
|          |     |         |              |                |     | % of<br>samples<br>BD         | 70         | 80,83<br>33333<br>3 |     |    |    |    | 40,833<br>33333 | 57,5 | 59,166<br>66667 |
|          |     |         |              |                |     |                               |            |                     |     |    |    |    |                 |      |                 |
|          |     |         |              |                |     | averagg<br>e when<br>detected | 30967<br>2 | 10563<br>2          |     |    |    |    |                 |      |                 |
|          |     |         |              |                |     | so<br>exclude<br>0's          | 8602       | 4592,<br>69565<br>2 |     |    |    |    |                 |      |                 |



| (b) Parameter        |    | Depth<br>(m) | Temp     | Flourescence          | PAR<br>(mmol<br>photons<br>m <sup>-2</sup> s <sup>-2</sup> ) | Salinity<br>(PSU) | Oxygen<br>(ml L <sup>-1</sup> ) | DIP      | DIN      | DiSi     |
|----------------------|----|--------------|----------|-----------------------|--------------------------------------------------------------|-------------------|---------------------------------|----------|----------|----------|
|                      |    |              | (°C)     | (mg L <sup>-1</sup> ) |                                                              |                   |                                 | μM       | mM       | mM       |
| <i>Trichodesmium</i> | CC | -0.478**     | 0.477**  | 0.010                 | 0.578**                                                      | -0.587**          | 0.127                           | -0.803** | -0.491** | -0.717** |
|                      | p  | <0.001       | <0.001   | 0.921                 | <0.001                                                       | <0.001            | 0.216                           | <0.001   | <0.001   | <0.001   |
| UCYN-B               | CC | -0.406**     | 0.355**  | -0.098                | 0.356**                                                      | -0.424**          | 0.222*                          | -0.485** | -0.409** | -0.380** |
|                      | p  | <0.001       | <0.001   | 0.313                 | 0.002                                                        | <0.001            | 0.021                           | <0.001   | <0.001   | <0.001   |
| UCYN-A1              | CC | 0.240**      | -0.315** | 0.244*                | -0.285*                                                      | 0.243*            | 0.554**                         | -0.094   | -0.055   | -0.026   |
|                      | p  | 0.008        | 0.001    | 0.011                 | 0.015                                                        | 0.011             | <0.001                          | 0.355    | 0.596    | 0.793    |
| UCYN-A2              | CC | 0.309**      | -0.313** | 0.187                 | -0.343**                                                     | 0.221*            | 0.584**                         | -0.112   | -0.075   | -0.028   |
|                      | p  | 0.001        | 0.001    | 0.053                 | 0.003                                                        | 0.021             | <0.001                          | 0.269    | 0.470    | 0.779    |
| UCYN-A1 host         | CC | 0.144        | -0.129   | 0.029                 | -0.128                                                       | 0.138             | 0.344**                         | 0.008    | -0.022   | 0.100    |
|                      | p  | 0.116        | 0.182    | 0.765                 | 0.284                                                        | 0.154             | <0.001                          | 0.937    | 0.835    | 0.317    |
| UCYN-A2 host         | CC | 0.090        | -0.082   | 0.042                 | -0.110                                                       | 0.100             | 0.298**                         | -0.060   | -0.069   | 0.055    |
|                      | p  | 0.330        | 0.401    | 0.673                 | 0.365                                                        | 0.310             | 0.002                           | 0.555    | 0.511    | 0.581    |
| het-1                | CC | -0.476**     | 0.400**  | -0.098                | 0.480**                                                      | -0.370**          | 0.141                           | -0.613** | -0.487** | -0.548** |
|                      | p  | <0.001       | <0.001   | 0.311                 | <0.001                                                       | <0.001            | 0.146                           | <0.001   | <0.001   | <0.001   |
| het-2                | CC | -0.464**     | 0.390**  | -0.171                | 0.417**                                                      | -0.452**          | 0.048                           | -0.559** | -0.410** | -0.479** |
|                      | p  | <0.001       | <0.001   | 0.076                 | <0.001                                                       | <0.001            | 0.623                           | <0.001   | <0.001   | <0.001   |
| het-3                | CC | -0.154       | 0.159    | 0.004                 | 0.165                                                        | -0.266**          | 0.125                           | -0.261** | -0.156   | -0.091   |
|                      | p  | 0.093        | 0.100    | 0.965                 | 0.167                                                        | 0.005             | 0.197                           | 0.009    | 0.134    | 0.362    |

Table S5. Summary of the microscopy cell abundances and qualitative observations of various diazotrophs. *Trichodesmium* spp. as free filaments, colonies, and *T. pelagicum* were enumerated at LD A, B and C.

| sample ID | Station | Depth (m) | Light (%) | <i>Trichodesmium</i> spp.      |                          | <i>T. pelagicum</i>            | <i>Richelia</i>                | <i>C. watsonii</i> like | Qualitative observations                                                                                                                                                                                              |
|-----------|---------|-----------|-----------|--------------------------------|--------------------------|--------------------------------|--------------------------------|-------------------------|-----------------------------------------------------------------------------------------------------------------------------------------------------------------------------------------------------------------------|
|           |         |           |           | free filaments L <sup>-1</sup> | colonies L <sup>-1</sup> | free filaments L <sup>-1</sup> | free filaments L <sup>-1</sup> | cells L <sup>-1</sup>   |                                                                                                                                                                                                                       |
| 8712      | A       | 0         | 100       | 5.8*                           |                          | 0.4*                           | 0.4*                           |                         | <i>Trichodesmium</i> filaments are short and/or broken (5-10 cells); <i>C. watsonii</i> -like cells present but difficult to distinguish due to poor fluorescence and interference with background of cellular debris |
| 8715      | A       | 4         | 75        | 3.4*                           |                          |                                | 0.2*                           |                         | Several <i>Trichodesmium</i> filaments under viral attach; <i>C. watsonii</i> -like cells present but cell diameter is smaller than usual (e.g. > 3µm).                                                               |
| 8718      | A       | 6         | 54        | 8*                             |                          | 1.4*                           |                                |                         | <i>Trichodesmium</i> filaments are short and/or broken (5-10 cells); lots of cellular debris                                                                                                                          |
| 8721      | A       | 16        | 36        | 5.2*                           |                          |                                |                                | 4416,5                  |                                                                                                                                                                                                                       |
| 8724      | A       | 0         | 100       | 4.4*                           |                          | 1.2*                           |                                |                         |                                                                                                                                                                                                                       |
| 8727      | A       | 5         | 75        | 86,4                           | 0.2*                     | 1*                             |                                |                         | <i>Trichodesmium</i> filaments are short and/or broken (5-10 cells)                                                                                                                                                   |
| 8730      | A       | 9         | 54        | 8.4*                           |                          |                                |                                |                         | <i>Trichodesmium</i> filaments are short and/or broken (5-10 cells)                                                                                                                                                   |





|                                                                                    |   |    |     |      |  |  |  |  |                                                                        |
|------------------------------------------------------------------------------------|---|----|-----|------|--|--|--|--|------------------------------------------------------------------------|
| 8847                                                                               | C | 0  | 100 |      |  |  |  |  | Low biomass; lots of cellular debris (broken frustules); dead copepods |
| 8850                                                                               | C | 6  | 75  | 0.6* |  |  |  |  | high density of picoeukaryotes but not evenly distributed on filter    |
| 8853                                                                               | C | 16 | 54  | 0.2* |  |  |  |  | less density of picoeukaryotes than 75% light                          |
| 8856                                                                               | C | 26 | 36  | 0.8* |  |  |  |  | low general biomass                                                    |
|                                                                                    |   |    |     |      |  |  |  |  |                                                                        |
| 8865                                                                               | C | 0  | 100 | 4*   |  |  |  |  | lots of cellular debris                                                |
| 8868                                                                               | C | 5  | 75  | 0.6* |  |  |  |  | high density of picoeukaryotes                                         |
| 8871                                                                               | C | 7  | 54  | 3*   |  |  |  |  | less density of picoeukaryotes than 75% light                          |
| 8874                                                                               | C | 13 | 36  | 1.4* |  |  |  |  |                                                                        |
| 8876                                                                               | C | 27 | 10  |      |  |  |  |  | presence of pico-eukaryotes; cellular debris                           |
|                                                                                    |   |    |     |      |  |  |  |  |                                                                        |
|                                                                                    |   |    |     |      |  |  |  |  |                                                                        |
| *, indicates that counts were less than 50 per filter (area=1734 mm <sup>2</sup> ) |   |    |     |      |  |  |  |  |                                                                        |

Table S6. Summary of environmental factors influencing the distribution of various diazotrophic targets reported here in the WTSP, and the global datasets. Parameters with positive, negative or no significant correlation are designated with +, - and 0, respectively (Spearman's Rho  $p < 0.05$ ): Parameters noted as nr have no recorded data, and parameters noted as bd have been sampled but were below detection. The following region abbreviations are used: NEP (North East Pacific), WTSP (South West Pacific), TA (Tropical Atlantic), NA (North Atlantic), WTNA (Western Tropical North Atlantic, EEA (East Equatorial Atlantic), NSCS (Northern South China Sea) and SSCS (Southern South China Sea). \* and \*\* marks positive and negative correlations respectively, which have small sample sizes ( $N < 33$ ) and are nearly significant ( $p < 0.095$ ). The overall between parameters effect ( $< 0.2$ =low,  $0.2-0.5$ =moderate,  $> 0.5$ =high) is the estimate of the effect size in a meta-analysis, where † marks statistical significance ( $p < 0.05$ ).

| Parameter            | Region | Study                                | Depth | Temp | Chl a | Salinity | DIP | DIN | <i>Trichodesmium</i> | UCYN-A | UCYN-B | Het-1 | Het-2 |
|----------------------|--------|--------------------------------------|-------|------|-------|----------|-----|-----|----------------------|--------|--------|-------|-------|
| <i>Trichodesmium</i> | NEP    | Church et al. 2005                   | -     | nr   | nr    | nr       | nr  | nr  |                      | +      | -      | 0     | nr    |
|                      |        | Church et al. 2008                   | 0     | 0    | 0     | nr       | nr  | 0   |                      | +      | +      | 0*    | +     |
|                      | SWP    | Moisander et al. 2010 (Tropical)     | -     | +    | 0     | -        | -   | -   |                      | 0*     | +      | +     | nr    |
|                      |        | Moisander et al. 2010 (Sub-tropical) | -     | +    | 0     | 0        | -   | -   |                      | +      | +      | +     | nr    |
|                      |        | This study                           | -     | +    | 0     | -        | -   | -   |                      | 0      | +      | +     | +     |
|                      | TA     | Goebel et al. 2010                   | -     | +    | nr    | -        | -   | 0   |                      | 0      | 0      | 0*    | 0     |
|                      | NA     | Langlois et al. 2008                 | -     | +    | nr    | -        | -   | -   |                      | +      | +      | nr    | nr    |

|                |        |                                      |                    |                   |       |                    |                    |                    |                      |                   |                   |                   |                   |
|----------------|--------|--------------------------------------|--------------------|-------------------|-------|--------------------|--------------------|--------------------|----------------------|-------------------|-------------------|-------------------|-------------------|
|                |        | Benavides et al. 2016                | nr                 | 0                 | 0     | 0                  | 0                  | 0                  |                      | -                 | nr                | 0                 | nr                |
|                | WTNA   | Foster et al. 2007                   | -                  | 0                 | nr    | 0                  | nr                 | nr                 |                      | +                 | +                 | +                 | +                 |
|                | EEA    | Foster et al. 2009                   | 0                  | +                 | nr    | -                  | nr                 | nr                 |                      | 0                 | +                 | 0                 | 0                 |
|                | NSCS   | Kong et al. 2011                     | 0                  | 0                 | 0     | 0                  | 0                  | 0                  |                      | 0                 | 0*                | 0                 | nr                |
|                | SSCS   | Moisander et al. 2008                | -                  | nr                | nr    | nr                 | nr                 | nr                 |                      | 0                 | +                 | 0                 | +                 |
|                |        | Bombar et al. 2011                   | 0                  | 0                 | 0     | 0                  | 0                  | 0                  |                      | bd                | 0*                | +                 | +                 |
| <b>Overall</b> | Global | ALL                                  | -0,41 <sup>†</sup> | 0,56 <sup>†</sup> | -0,03 | -0,33 <sup>†</sup> | -0,56 <sup>†</sup> | -0,39 <sup>†</sup> |                      | 0,25 <sup>†</sup> | 0,50 <sup>†</sup> | 0,52 <sup>†</sup> | 0,55 <sup>†</sup> |
| Parameter      | Region | Study                                | Depth              | Temp              | Chl a | Salinity           | DIP                | DIN                | <i>Trichodesmium</i> | UCYN-A            | UCYN-B            | Het-1             | Het-2             |
| UCYN-A         | NEP    | Church et al. 2005                   | -                  | nr                | nr    | nr                 | nr                 | nr                 | +                    |                   | -                 | 0                 | nr                |
|                |        | Church et al. 2008                   | 0                  | 0                 | 0     | nr                 | nr                 | 0                  | +                    |                   | +                 | +                 | 0                 |
|                | SWP    | Moisander et al. 2010 (Tropical)     | -                  | 0                 | 0     | 0                  | -                  | 0                  | 0*                   |                   | +                 | 0                 | nr                |
|                |        | Moisander et al. 2010 (Sub-tropical) | -                  | +                 | 0     | 0                  | -                  | -                  | +                    |                   | +                 | +                 | nr                |

|                |        |                       |                    |      |       |          |                    |                    |                      |        |                   |                   |       |
|----------------|--------|-----------------------|--------------------|------|-------|----------|--------------------|--------------------|----------------------|--------|-------------------|-------------------|-------|
|                |        | This study            | +                  | -    | +     | +        | 0                  | 0                  | 0                    |        | +                 | 0                 | 0     |
|                | TA     | Goebel et al. 2010    | -                  | 0    | nr    | +        | -                  | 0                  | 0                    |        | +                 | 0                 | 0     |
|                | NA     | Langlois et al. 2008  | 0                  | 0    | nr    | +        | -                  | -                  | +                    |        | +                 | nr                | nr    |
|                |        | Benavides et al. 2016 | nr                 | -    | +     | 0        | 0                  | 0                  | -                    |        | nr                | 0                 | nr    |
|                | WTNA   | Foster et al. 2007    | 0                  | 0    | nr    | 0        | nr                 | nr                 | +                    |        | +                 | +                 | 0     |
|                | EEA    | Foster et al. 2009    | 0                  | 0    | nr    | 0        | nr                 | nr                 | 0                    |        | 0                 | 0                 | 0     |
|                | NSCS   | Kong et al. 2011      | -                  | +    | 0     | -        | -                  | -                  | 0                    |        | +                 | +                 | nr    |
|                | SSCS   | Moisander et al. 2008 | 0                  | nr   | nr    | nr       | nr                 | nr                 | 0                    |        | 0                 | 0                 | 0     |
|                |        | Bombar et al. 2011    | bd                 | bd   | bd    | bd       | bd                 | bd                 | bd                   |        | bd                | bd                | bd    |
| <b>Overall</b> | Global | ALL                   | -0,28 <sup>†</sup> | 0,09 | 0,02  | 0,09     | -0,34 <sup>†</sup> | -0,32 <sup>†</sup> | 0,25 <sup>†</sup>    |        | 0,35 <sup>†</sup> | 0,28 <sup>†</sup> | 0,03  |
| Parameter      | Region | Study                 | Depth              | Temp | Chl a | Salinity | DIP                | DIN                | <i>Trichodesmium</i> | UCYN-A | UCYN-B            | Het-1             | Het-2 |
| UCYN-B         | NEP    | Church et al. 2005a   | 0                  | nr   | nr    | nr       | nr                 | nr                 | -                    | -      |                   | -                 | nr    |
|                |        | Church et al. 2008    | 0                  | 0    | 0     | nr       | nr                 | 0                  | +                    | +      |                   | +                 | +     |

|                |        |                                      |                    |                   |                    |          |                    |                    |                      |                   |        |                   |                   |
|----------------|--------|--------------------------------------|--------------------|-------------------|--------------------|----------|--------------------|--------------------|----------------------|-------------------|--------|-------------------|-------------------|
|                | SWP    | Moisander et al. 2010 (Tropical)     | -                  | +                 | -                  | -        | -                  | -                  | +                    | +                 |        | +                 | nr                |
|                |        | Moisander et al. 2010 (Sub-tropical) | -                  | +                 | -                  | -        | -                  | -                  | +                    | +                 |        | +                 | nr                |
|                |        | This study                           | -                  | +                 | 0                  | -        | -                  | -                  | +                    | +                 |        | +                 | +                 |
|                | TA     | Goebel et al. 2010                   | 0                  | 0                 | nr                 | 0        | 0                  | 0                  | 0                    | +                 |        | 0                 | 0                 |
|                | NA     | Langlois et al. 2008                 | 0                  | 0                 | 0                  | nr       | -                  | -                  | +                    | +                 |        | nr                | nr                |
|                | WTNA   | Foster et al. 2007                   | 0                  | +                 | nr                 | 0        | nr                 | nr                 | +                    | +                 |        | +                 | +                 |
|                | EEA    | Foster et al. 2009                   | 0                  | +                 | nr                 | 0        | nr                 | nr                 | +                    | 0                 |        | 0                 | 0                 |
|                | NSCS   | Kong et al. 2011                     | -                  | +                 | -                  | -        | -                  | -                  | 0*                   | +                 |        | +                 | nr                |
|                | SSCS   | Moisander et al. 2008                | -                  | nr                | nr                 | nr       | nr                 | nr                 | +                    | 0                 |        | 0                 | 0                 |
|                |        | Bombar et al. 2011                   | 0*                 | 0                 | 0**                | 0*       | 0**                | 0                  | 0*                   | bd                |        | +                 | 0                 |
| <b>Overall</b> | Global | ALL                                  | -0,32 <sup>†</sup> | 0,47 <sup>†</sup> | -0,25 <sup>†</sup> | -0,20    | -0,40 <sup>†</sup> | -0,50 <sup>†</sup> | 0,50 <sup>†</sup>    | 0,35 <sup>†</sup> |        | 0,38 <sup>†</sup> | 0,29 <sup>†</sup> |
| Parameter      | Region | Study                                | Depth              | Temp              | Chl a              | Salinity | DIP                | DIN                | <i>Trichodesmium</i> | UCYN-A            | UCYN-B | Het-1             | Het-2             |

|       |      |                                      |     |    |     |     |    |    |    |    |    |  |    |
|-------|------|--------------------------------------|-----|----|-----|-----|----|----|----|----|----|--|----|
| Het-1 | NEP  | Church et al. 2005                   | 0   | nr | nr  | nr  | nr | nr | 0  | 0  | -  |  | nr |
|       |      | Church et al. 2008                   | 0   | 0  | 0   | nr  | nr | 0  | 0* | +  | +  |  | 0* |
|       | SWP  | Moisander et al. 2010 (Tropical)     | -   | +  | 0   | -   | -  | -  | +  | 0  | +  |  | nr |
|       |      | Moisander et al. 2010 (Sub-tropical) | -   | +  | 0** | 0** | -  | -  | +  | +  | +  |  | nr |
|       |      | This study                           | -   | +  | 0   | -   | -  | -  | +  | 0  | +  |  | +  |
|       | TA   | Goebel et al. 2010                   | 0   | 0  | nr  | 0   | nr | nr | 0* | 0  | 0  |  | 0* |
|       | NA   | Benavides et al. 2016                | nr  | 0  | 0   | 0   | 0  | 0  | 0  | 0  | nr |  | nr |
|       | WTNA | Foster et al. 2007                   | -   | +  | nr  | -   | nr | nr | +  | +  | +  |  | +  |
|       | EEA  | Foster et al. 2009                   | 0** | 0  | nr  | 0   | nr | nr | 0  | 0  | 0  |  | 0  |
|       | NSCS | Kong et al. 2011                     | -   | +  | 0   | -   | -  | -  | 0  | +  | +  |  | nr |
|       | SSCS | Moisander et al. 2008                | 0   | nr | nr  | nr  | nr | nr | 0  | 0  | 0  |  | 0  |
|       |      | Bombar et al. 2011                   | +   | -  | 0** | +   | -  | -  | +  | bd | +  |  | +  |

|                |        |                       |                    |                   |                    |                    |                    |                    |                      |                   |                   |                   |                   |
|----------------|--------|-----------------------|--------------------|-------------------|--------------------|--------------------|--------------------|--------------------|----------------------|-------------------|-------------------|-------------------|-------------------|
| <b>Overall</b> | Global | ALL                   | -0,37 <sup>†</sup> | 0,30 <sup>†</sup> | -0,19 <sup>†</sup> | -0,22 <sup>†</sup> | -0,62 <sup>†</sup> | -0,51 <sup>†</sup> | 0,52 <sup>†</sup>    | 0,28 <sup>†</sup> | 0,41 <sup>†</sup> |                   | 0,48 <sup>†</sup> |
| Parameter      | Region | Study                 | Depth              | Temp              | Chl a              | Salinity           | DIP                | DIN                | <i>Trichodesmium</i> | UCYN-A            | UCYN-B            | Het-1             | Het-2             |
| Het-2          | NEP    | Church et al. 2008    | 0*                 | 0                 | 0                  | nd                 | nd                 | nd                 | +                    | 0                 | +                 | 0*                |                   |
|                | SWP    | This study            | -                  | +                 | 0                  | -                  | -                  | -                  | +                    | 0                 | +                 | +                 |                   |
|                | TA     | Goebel et al. 2010    | 0                  | +                 | nd                 | 0                  | nd                 | nd                 | 0                    | 0                 | 0                 | 0*                |                   |
|                | WTNA   | Foster et al. 2007    | -                  | 0                 | nd                 | -                  | nd                 | nd                 | +                    | 0                 | +                 | +                 |                   |
|                | TEA    | Foster et al. 2009    | 0                  | 0                 | nd                 | 0                  | nd                 | nd                 | 0                    | 0                 | 0                 | 0                 |                   |
|                | SSCS   | Moisander et al. 2008 | 0                  | nd                | nd                 | nd                 | nd                 | nd                 | +                    | 0                 | 0                 | 0                 |                   |
|                |        | Bombar et al. 2011    | 0                  | 0                 | 0                  | 0                  | 0                  | 0                  | 0**                  | +                 | UD                | 0                 | +                 |
| <b>Overall</b> | Global | ALL                   | -0,15              | 0,30 <sup>†</sup> | -0,16              | -0,31 <sup>†</sup> | -0,4               | -0,34 <sup>†</sup> | 0,55 <sup>†</sup>    | 0,03              | 0,29 <sup>†</sup> | 0,48 <sup>†</sup> |                   |
