# Supplementary material for: Distribution and drivers of symbiotic and free-living diazotrophic cyanobacteria in the Western Tropical South Pacific
Source: Copernicus journal article supplement (doi:10.5194/bg-2017-63), 2017-03-10
Supplement: Supplementary file [file Manuscript_MS_revised.pdf › Manuscript_MS_revised.pdf]

**Distribution and drivers of symbiotic and free-living  
diazotrophic cyanobacteria in the Western Tropical South  
Pacific**

Marcus Stenegren<sup>1</sup>, Andrea Caputo<sup>1</sup>, Carlo Berg<sup>2</sup>, Sophie Bonnet<sup>3,4</sup>, Rachel A Foster<sup>1</sup>

<sup>1</sup> Stockholm University, Department of Ecology, Environment and Plant Sciences. Stockholm, Sweden

<sup>2</sup> Science for Life Laboratory/Department of Biology and Environmental Science, Linnaeus University, Kalmar,  
Sweden

<sup>3</sup> Aix Marseille Université, Centre National de la Recherche Scientifique. Marseille/Noumea, New Caledonia,  
France

<sup>4</sup> Mediterranean Institute of Oceanography, Institut de Recherche pour le Développement. Marseille, France

*Correspondence to:* Marcus Stenegren (marcus.stenegren@su.se)

## Abstract

The abundance and distribution of cyanobacterial diazotrophs were quantified in two regions (Melanesian archipelago, MA and subtropical gyre, SG) of the Western Tropical South Pacific using *nifH* qPCR assays. UCYN-A1 and A2 host populations were quantified using 18S rRNA qPCR assays including one newly developed assay. All phylotypes were detected in the upper photic zone (0-50 m), with higher abundances in the MA region. *Trichodesmium* and UCYN-B dominated, when detected *nifH* copies ranged  $2.18 \times 10^2$ - $9.41 \times 10^6$  and  $1.10 \times 10^2$  –  $2.78 \times 10^6$  copies L<sup>-1</sup>, respectively. Het-1 (symbiont of *Rhizosolenia* diatoms) was the next most abundant ( $1.40 \times 10^1$ - $1.74 \times 10^5$  *nifH* copies L<sup>-1</sup>), and co-occurred with het-2 and het-3. UCYN-A1 and A2 were the least abundant diazotrophs and were below detection (bd) in 84 and 97, respectively, of 120 samples. UCYN-A1 and A2 were detected while their respective hosts were bd, suggesting a lower partner fidelity or free-living state. Pairwise comparisons of the *nifH* abundances and various environmental parameters supported two groups: deep dwelling (45 m) comprised of UCYN-A1 and A2 and surface group (0-15m) comprised of *Trichodesmium*, het-1 and het-2. Temperature and PAR were positively correlated the surface group; while UCYN-A1 and A2 were positively correlated with depth, salinity and oxygen. Similar results were identified in a meta-analysis of 11 external datasets, where temperature seemed to have a major impact. Combined, our results indicate that conditions favoring the UCYN-A symbiosis differ from those of diatom diazotroph associations and free-living cyanobacterial diazotrophs.

## 1 Introduction

Biological di-nitrogen (N<sub>2</sub>) fixation is considered a major source of new nitrogen (N) to oceanic ecosystems (Karl et al., 1997). N<sub>2</sub> fixation is an energetically expensive process, where N<sub>2</sub> gas is reduced to bioavailable ammonia (Howard and Rees, 1996) and is performed by a small but diverse group of bacteria and archaea. The nitrogenase enzyme, which is encoded by a suite of *nif*-genes, mediates N<sub>2</sub> fixation (Jacobson et al., 1989; Young, 2005). Nitrogenase has a high iron (Fe) requirement (Howard and Rees, 1996), and often N<sub>2</sub> fixers, or diazotrophs, are Fe- limited (Kustka et al., 2003; Raven, 1988). Nitrogenase is also sensitive to oxygen (O<sub>2</sub>), which has been shown to negatively influence N<sub>2</sub> fixation efficiency (Meyerhof and Burk, 1928; Stewart, 1969). Thus, autotrophic diazotrophs (e.g. cyanobacteria) have evolved strategies, such as temporal and spatial separation of the fixation process, to protect their nitrogenase from O<sub>2</sub> evolution during photosynthesis (Berman-Frank et al., 2001; Haselkorn, 1978; Mitsui et al., 1986). N<sub>2</sub> fixation is widespread and occurs in marine, limnic and terrestrial habitats. In marine ecosystems it mainly occurs in the photic zone, closest to the surface, however, more recently, evidence has shown activity in deeper depths below the photic zone, including oxygen minimum zones (Benavides et al., 2016; Bonnet et al., 2013; Fernandez et al., 2011; Halm et al., 2009; Löscher et al., 2015).

N<sub>2</sub> fixation in the photic zone is often attributed to a diverse group of cyanobacteria. Traditionally, marine, photic dwelling diazotrophs are divided into two groups based on cell diameter, e.g. > 10 µm and < 10 µm size fractions. Diatom diazotroph associations (DDAs), symbioses between heterocystous cyanobacteria and a variety of diatom genera, and large filamentous non-heterocystous *Trichodesmium* spp., compose the larger size fraction (>10 µm). *Trichodesmium* spp. occurs as free filaments or often in two morphologies of colonies: tufts/rafts and puffs. There are three defined lineages of symbionts of DDAs based on their *nifH* phylogeny: het-1 and het-2 refers to the two the *Richelia intracellularis* lineages which

associate with diatom genera, *Rhizosolenia* and *Hemiaulus*, respectively, while the third lineage, het-3, is a symbiosis between the heterocystous *Calothrix rhizosoleniae* and *Chaetoceros compressus* diatoms (Foster et al., 2010; Foster and Zehr, 2006).

The unicellular diazotrophic cyanobacterial groups are divided into: UCYN-A, UCYN-B, and UCYN-C groups and are representatives of the <10 µm size fraction. The UCYN-A (*Candidatus Atelocyanobacterium thalassa*) group can be further delineated into [6](#) sublineages ([Thompson et al., 2014; Turk-Kubo et al., 2017](#)), two (UCYN-A1, UCYN-A2) are identified as symbiotic with small prymnesiophyte microalgae (reviewed by Farnelid et al., 2016, see references within). The UCYN-B group has its closest cultured relative as *Crocospaera watsonii* and lives freely, colonially, and also in symbiosis with the diatom *Climacodium frauenfeldianum* (Bench et al., 2013; Carpenter and Janson, 2000; Webb et al., 2009; Zehr et al., 2001). Often overlooked, is the observation that UCYN-B, when colonial or symbiotic could also be associated with the > 10µm size fraction. Less is known about the UCYN-C, and given that its *nifH* nucleotide sequence is 90% similar (Foster et al., 2007) to *Cyanothece* spp. ATCC51142, it is assumed to be analogous, and thus co-occur with the other < 10 µm size fraction. A diverse group of free-living heterotrophic bacteria (e.g. gamma proteobacteria) (Berthelot et al., 2015; Bombar et al., 2016; Halm et al., 2012; Langlois et al., 2005) and archaea (Zehr et al., 2005) are also within the < 10 µm size fraction.

The distribution and activity of diazotrophs in open ocean ecosystems are governed by different ambient environmental factors, including macronutrient availability (Moutin et al., 2008; Sañudo-Wilhelmy et al., 2001) and temperature (Messer et al., 2016; Moisander et al., 2010). There are also simultaneous influences by several factors (i.e. co-limitation of nutrients, Mills et al., 2004). Moreover, most oceanic models of N<sub>2</sub> fixation assume that all diazotrophs are equally controlled by the same environmental parameters (Deutsch et al., 2007; Hood et al., 2004; Landolfi et al., 2015), despite well recognized differences in genetic repertoires for

assimilating dissolved nutrient pools (e.g. dissolved organic phosphate, Dyhrman et al., 2006; Dyhrman and Ruttenberg, 2006), life histories (free, symbiotic, colonial), and cell sizes ( $\mu\text{m}$  to mm). A better understanding of these differences would benefit oceanic models of  $\text{N}_2$  fixation, our understanding of marine  $\text{N}_2$  budgets and the impact of  $\text{N}_2$  fixation in oceanic surface waters and their communities.

The Tropical South Pacific Ocean (TSP) is considered one of the most oligotrophic regions in the World's oceans (Claustre and Maritorena, 2003) with a widespread N deficiency (Deutsch et al., 2007; Raimbault et al., 2007) and in the central SP gyre, some of the lowest concentrations of dissolved Fe in the world have been reported (Blain et al., 2008). One exception is the Western Tropical South Pacific (WTSP), harboring many islands with Fe rich sediments adding to an island mass effect (Shiozaki et al., 2014) and being influenced by multiple ocean currents, both surface and subsurface, that drive the distribution of dissolved nutrients, micronutrients, and the biota (Fitzsimmons et al., 2014; Gourdeau et al., 2008; Marchesiello and Estrade, 2010; Wells et al., 1999). The structure of these currents also promotes shearing instabilities and strong eddies (Qiu et al., 2009). Moreover, Van Den Broeck et al. (2004) suggested that the WTSP is phosphate limited, while Law et al. (2011) hypothesized that primary production and  $\text{N}_2$  fixation in the WTSP follows the seasonality of cyclones, which in their wake, enrich surface waters with phosphate, and fuel primary and new production. An earlier investigation along a transect in the western equatorial Pacific estimated that 74% of the total  $\text{N}_2$  fixation could be attributed to the  $<10 \mu\text{m}$  size fraction as abundances of unicellular cyanobacteria were high ( $17 \text{ cells mL}^{-1}$ ) (Bonnet et al., 2009). However, diazotroph quantification is lacking further South in tropical waters, despite being recently recognized as a hot spot of  $\text{N}_2$  fixation, with average rates of  $\sim 570 \mu\text{mol N m}^{-2} \text{ d}^{-1}$  (Bonnet et al., this issue), i.e. in the upper range ( $100\text{--}1000 \mu\text{mol N m}^{-2} \text{ d}^{-1}$ ) of rates gathered in the global  $\text{N}_2$  fixation MAREDAT database (Luo et al., 2012).

The primary aim of this study was to quantify diazotroph abundance and distribution in the WTSP with an emphasis on symbiotic N<sub>2</sub>-fixing populations; both by 'at sea' and lab based quantitative approaches. [Since earlier expeditions to the SW Pacific identified it as a potential 'hotspot' for diazotrophy \(Bonnet et al., 2015; 2016; 2017; Moisaner et al., 2010\), the 'at sea' qPCR was performed in order to make informed decisions about the presence, absence, and relative abundance of diazotrophs so that stations could be selected for other assays and characterization of the hydrographic conditions \(e.g. incubation experiments, sediment and drifter deployments \(see Bonnet et al. \[this issue\]\(#\)\).](#) For a more comprehensive investigation of the symbiotic diazotrophs we developed a new primer and probe set for quantification of the UCYN-A1 host. We also identified key environmental parameters, both biotic and abiotic, which influenced the distribution of diazotrophs in the WTSP and tested the congruency of these parameters in an additional 11 publicly available datasets. We hypothesized that the distribution and the underlying factors of the diazotrophic symbioses should differ due to the major differences in host taxonomy (e.g. diatom vs. prymnesiophyte), size (1-2 µm to 100's µm), and life history (free vs. symbiotic; chain forming). For comparison and for similarly divergent characteristics (symbiotic vs. free; colonial vs. single), several free-living (UCYN-B, *Trichodesmium* spp.) cyanobacterial diazotrophs were also included.

## 2 Materials and Methods

### 2.1 Sampling

Sampling was conducted on a transect in the WTSP during austral summer (19 Feb-5 Apr, 2015), on board the R/V *L'Atalante* (Fig. 1a). Nucleic acid samples were taken from 18 stations: three long duration (LD A, B and C) stations (approximately eight days duration) and 15 short duration (SD 1-15) stations (approximately eight hours duration). [The LD stations were selected according to the following: regions with low advection to better estimate](#)

[biogeochemical budgets, contrasting diazotrophic community \(e.g. \*Trichodesmium\* spp. dominated vs. UCYN dominated\), and along a trophic and N<sub>2</sub> fixation gradient from west to east \(Moutin et al., \[this issue\]\(#\)\)](#). The cruise transect was divided into two geographic regions (Fig. 1a). The first region (Melanesian archipelago, MA) included SD 1-12, LD A and LD B stations (160° E-178° E and 170°-175° W). The second region (subtropical gyre, SG) included SD 13-15 and LD C stations (160° W-169° W). LD stations were chosen based on hydrographic conditions, satellite imagery, microscopic analyses of >10 µm cyanobacterial diazotrophs and the results of ‘at sea’ qPCR analyses of four unicellular diazotrophic targets (UCYN-A1, UCYN-A2, UCYN-B and UCYN-C) (see below and Moutin et al., [this issue](#)).

### **[2.1.1 Nucleic acids](#)**

Seawater (2.5 L) was collected into clean (10% bleach rinsed) 2.75 L polycarbonate bottles from 6-7 discrete depths based on surface incident light intensity (100, 75, 54, 36, 10, 1, and 0.1%) once per station at both SD and LD stations using Niskin bottles (12 L) arranged on a Conductivity Temperature Depth (CTD; [Seabird 911](#)) rosette.

After collection from the CTD rosette, [2.5L](#) seawater was immediately filtered onto a 0.2 µm pore size Supor filter (Pall Corporation, Pall Norden AB, Lund, Sweden) held within a 25 mm diameter swinnex filter holder (Merck Millipore, Solna, Sweden) using a peristaltic pump (Cole-Parmer, Masterflex, Easy-load II, USA). [In case the filters clogged with too much material, the remaining volume was measured and noted for later calculations.](#) The filters were placed in pre-sterilized bead beater tubes (Biospec Bartlesville, OK, USA) containing 30 µL of 0.1 mm and 0.5 mm glass bead mixture, flash frozen in liquid nitrogen and archived at -80 °C. Four additional DNA samples were collected from 4 discrete depths, (75, 50, 36, 10 % light), at 11 of the 18 stations, for the ‘at sea’ qPCR (see below) and filtered as described above. [The ‘at sea’ samples were extracted and processed for qPCR immediately after collection \(see below\).](#)

### **2.1.2 Cell abundances and microscopy observations**

At the LD stations, 5 L of seawater was collected at the same depths [in](#) parallel with the nucleic acid samples from the CTD-rosette. Two sets of samples, one set each day, were taken on day 1 and 3 at each LD station and immediately filtered onto a 47 mm diameter Poretics (millipore) membrane filter with a pore size of 5  $\mu\text{m}$  using a peristaltic pump.

At the SD stations, the same collection was implemented, however a 25 mm diameter Poretics membrane filter was used. The high densities of cells on the latter made it impossible to properly enumerate the various cyanobacterial diazotrophs and as such these samples were used only for qualitative observations (see below). Immediately after filtration, samples were fixed in 1 % paraformaldehyde (v/v) for 30 min prior to storing at -20 °C. For enumeration, the filter was mounted on a glass slide and examined under an Olympus BX60 microscope equipped with a filter for blue (460-490 nm) and green (545-580 nm) excitation wavelengths. Three areas (area = 0.94 mm<sup>2</sup>) per filter were counted separately and values were averaged. When abundances were low, the entire filter (area = 1734 mm<sup>2</sup>) was observed and cells enumerated. Due to weak fluorescence, only *Trichodesmium* colonies and free-filaments could be accurately estimated by microscopy and in addition, the larger cell diameter *Trichodesmium*, hereafter referred to as *Katagynemene pelagicum*, was enumerated separately as these were often present albeit at lower cell densities. Other cyanobacterial diazotrophs, e.g. *C. watsonii*-like, *C. rhizosoleniae* (het-3), and *R. intracellularis* (het-1, het-2) were also present on the larger 47 mm diameter samples, however fluorescence was weak and therefore difficult to enumerate. Pico-eukaryote populations, identified as round 1-3  $\mu\text{m}$  diameter cells, with red excitation under the blue filter set, were also observed. For the latter populations, qualitative observations of presence and some details on cell integrity (e.g. fluorescence, diatom frustule, free-living or symbiotic form) are included.



## 2.2 Nutrient analyses

Seawater for nutrient analyses was collected from each station using the CTD rosette at the same depths as those collected for the nucleic acids. Seawater for inorganic nutrient analysis were collected in 20 mL high-density polyethylene HCL-rinsed bottles and poisoned with  $\text{HgCl}_2$  to a final concentration of  $20 \mu\text{g L}^{-1}$  and stored at  $4^\circ\text{C}$  until analysis. [The samples were returned to the laboratory frozen within 4 months for analysis.](#) Dissolved nitrate and nitrite ( $\text{NO}_3^- + \text{NO}_2^-$ , DIN), phosphate ( $\text{PO}_4^{3-}$ , DIP) and silicate ( $\text{Si (OH)}_4$ , DiSi) concentrations were determined by standard colorimetric techniques using a segmented flow analyzer according to Aminot and K  rouel (2007) on a SEAL Analytical AA3 HR system (SEAL Analytica, Serblabo Technologies, Entraigues Sur La Sorgue, France). Quantification limits for nitrate, phosphate and silicate were all  $0.05 \mu\text{mol L}^{-1}$ .

## 2.3 DNA extraction

The DNA from the 120 archived samples was extracted as described in Moisander et al. (2008), with a 30 second reduction in the agitation step in a Fast Prep cell disrupter (Thermo, Model FP120; Qbiogene, Inc. Cedex, France) and an elution volume of  $70 \mu\text{L}$ . The nucleic acid samples collected for the ‘at sea’ qPCR were extracted immediately after filtration using a modified version of the DNAeasy plant kit (Qiagen) total DNA extraction protocol. The modifications were an initial 2-minute agitation step using a bead beater (Biospec MiniBeadBeater-16, Model 607EUR; Biospec), [10 min proteinase K incubation](#) and final elution volume was  $25 \mu\text{L}$ .

## 2.4 Oligonucleotide design

A new primer and probe set was designed to amplify the UCYN-A1 host and was based on published 18S rRNA sequence (accession number JX291893) reported from N. Pacific gyre (station ALOHA) (Thompson et al., 2012). The design utilized the same 96 bp target region of the 18S rRNA used to amplify UCYN-A2 hosts described in Thompson et al. 2014 (Suppl.

Table 1). The primers and probe for the UCYN-A1 host 18S rRNA gene assay are as follows:  
 Forward, 5' AGGTTTGCCGGTCTGCCGAT-3'; Reverse, 5'  
 GAGCGGGTGTCGGAGACGGAT-3'; Probe, 5'-FAM-CTGGTAGAACTGTCCT-  
 TAMRA-3'. The forward, reverse and probe contain 2-4, 1, and 5 mismatches, respectively,  
 to UCYN-A2 host sequences (accession number KF771248-KF771254) and the following  
 closely related sequences (98-100%): uncultured eukaryote clones (station ALHOA:  
 EU50069; Cariaco Basin: GU824119) *Chrysochromulina parkeae*: AM490994),  
*Braarudosphaera bigelowii* TP056a: AB250784 *B. bigelowii* Furue-15: AB478413; *B.*  
*bigelowii* Funahama T3: AB478413; *B. bigelowii* Yastushiro-1 AB478414. The UCYN-A1  
 oligonucleotides specificity was tested *de nova* against the following closely related sequences  
 derived from uncultured eukaryotic clonal sequences (accession numbers: EU500067-68;  
 FJ537341; EU500138-39; EF695227; EU500141; EU499958; EF695229; EF695220). Only  
 one mismatch was found in the forward probe for one sequence (EU500138) ([Suppl. Table 1](#)).  
[The nucleotide sequence identity for UCYN-A1 and UCYN-A2 host sequences is 97.95%.](#)  
 Finally, a cross reactivity test between the newly designed UCYN-A1 host oligonucleotides  
 and a dilution series of the UCYN-A2 host template was run (see below).

## 2.5 Quantitative PCR

Abundances of selected diazotrophs *nifH* gene copies (UCYN-A1, UCYN-A2, UCYN-B,  
 UCYN-C, het-1, het-2, het-3 and *Trichodesmium* spp.) and the 18S rRNA of UCYN-A1 and  
 A2 hosts were performed using previously published oligonucleotides and TaqMAN assays  
 (Church et al., 2005; Foster et al., 2007; Moisander et al., 2010; Thompson et al., 2014) and  
 the newly designed UCYN-A1 host oligonucleotides (Suppl. Table 1). The qPCRs were  
 conducted in a StepOnePlus system (Applied Biosystems, Life Technologies, Stockholm  
 Sweden) in fast (>40 min) mode with the following parameters: 95 °C for 20 s, followed by  
 45 cycles of 95 °C for 1 s and 60 °C for 20 s.

Cross reactivity tests were run on two of the heterocystous symbiont (het-1 and het-2) oligonucleotides, the UCYN-A1 and UCYN-A2 oligonucleotides, and the newly designed UCYN-A1 host oligonucleotides and UCYN-A2 host primer and probe set. [Cross reactivity tests for het-3 were omitted as previously published tests \(Foster et al., 2007\) showed no cross-reaction with het-1 or het-2.](#) The standard curve for a particular target was run in reactions with the other primers and probe sets. For example, the UCYN-A1 TaqMAN host primers and probes were run in reactions with UCYN-A2 template DNA. The cross reactivity for the het-1 and het-2 primer and probe sets has been previously reported (Foster et al. 2007), however only when the assay is run in standard mode. Standard mode runs the holding, denaturation and annealing stages at the following longer intervals than in Fast mode: 11 min and 40 s, 14 s, and 40 s, respectively. Hence, we tested the cross-reactivity for the het primers and probes when run in fast mode, as the fast mode was used in our study. Similarly, the cross-reactivity between UCYN-A1 and UCYN-A2 were tested in fast mode at two annealing temperatures 60 °C and 64 °C; 64 °C is the recommended annealing temperature for the UCYN-A2 assay (Thompson et al. 2014).

Reaction volume was 20 µL in all qPCRs and consisted of 10 µL of 2X TaqMan fast buffer (Applied Biosystems, 5.5 µL of nuclease free water (Sigma Aldrich Sweden AB, Stockholm Sweden), 1 µL each of the forward and reverse primers (10 µM), 0.5 µL of fluorogenic probe (10 µM) and 2 µL of DNA extract. For standard mode runs, the latter master mix was identical with the exception of replacing the fast 2X buffer with the standard 2X buffer. For reactions quantifying *Trichodesmium* spp. *nifH* copies, SD 9 was excluded and 1 µL of DNA template was used for the remaining stations due to low template volume, and total reaction volume was adjusted by addition of 1 µL of nuclease free water. Reactions were performed in duplicates for the ‘at sea’ qPCR and in triplicates for the archived samples and lab based qPCR. For the ‘at sea’ qPCR, only four targets (UCYN-A1, UCYN-A2, UCYN-B, and

UCYN-C) were quantified and only at the SD stations. No assays were processed at SD 5-6, 10-12, and 14 for the ‘at sea’ qPCR due to no potential LD station selection for these sites.

Two  $\mu\text{L}$  of nuclease free water was used as template in no template controls (NTCs); no *nifH* copies were detected in the NTCs.

Gene copy abundance was calculated from the mean Ct value of the 3 replicates and the standard curve for the appropriate oligonucleotides in the lab based qPCRs. For the ‘at sea’ qPCR, a mean Ct value of 2 replicates was used to maximize the number of samples run on one amplification plate (96 well). In samples where 1 or 2 out of 3 replicates produced an amplification, signals were noted as detectable, but not quantifiable (dnq) and no amplification was noted as below detection (bd).

## 2.6 Standard curves and PCR efficiency

Standard curves were plotted and analyzed in Excel for each target based on the qPCR cycle threshold (Ct) values from known dilutions of synthesized target gene fragments (gBlocks®; Integrated DNA Technologies, Leuven Belgium) (359 bp *nifH* and 733 bp 18S rRNA for UCYN-A hosts). Tenfold dilutions were made starting with  $10^8$  to  $10^1$  gene copies  $\text{L}^{-1}$ . The PCR efficiency, for identification of possible interfering contaminants in our samples, was determined as previously described (Short et al., 2004) for 12 samples run on the het-1, het-2, and het-3 primers and probe tests. The qPCR efficiency ranged from 90-99 % with an average of 94 % efficiency for the diazotroph targets het-1, het-2 and het-3.

## 2.7 Statistics and data analysis

Skewness and normal distribution tests by descriptive statistics was performed in IBM SPSS (ver. 23) on the following parameters recorded during sample collection in the WTSP from the CTD package: depth (m), oxygen ( $\text{ml L}^{-1}$ ), temperature ( $^{\circ}\text{C}$ ), chlorophyll fluorescence ( $\mu\text{g L}^{-1}$ ), photosynthetically active radiation (PAR;  $\mu\text{mol photons m}^{-2} \text{s}^{-1}$ ), salinity (PSU), and gene

1 copy abundances determined by qPCR. Significant skew was noted when skewness, divided  
2 by its standard deviation, exceeded 1.95. All but three targets (het-1, UCYN-B and  
3 *Trichodesmium* spp.) and three environmental parameters (temperature, salinity and oxygen)  
4 were significantly skewed (not normally distributed) even after LOG10 transformation.  
5 Therefore a non-parametric Spearman's rank correlation was conducted to test possible  
6 correlations between the targets and environmental parameters, where we assume that the het  
7 groups and UCYN-A clade is symbiotic, while UCYN-B is free living. The resulting  
8 correlation matrices were visualized in the form of a heat map of hierarchical clustering in R  
9 (ver. 3.2.2) using packages 'hmisc' and 'gplots'. Multivariate statistics by redundancy  
10 analysis (RDA) was conducted using the R package 'vegan'. T-tests, in IBM SPSS (ver. 23)  
11 were performed to characterize the different regions along the cruise transect based on  
12 environmental parameters, including nutrients, measured between stations and was reported as  
13 mean concentrations. For meta-analysis on the external dataset from 11 publically available  
14 datasets, sampled in the Atlantic, Pacific and South China Sea, data was acquired from the  
15 PANGAEA database and previous publications (Benavides et al., 2016; Bombar et al., 2011;  
16 Church et al., 2005, 2008, Foster et al., 2007, 2009; Goebel et al., 2010; Kong et al., 2011;  
17 Langlois et al., 2008; Moisander et al., 2008, 2010). We included only datasets with a  
18 minimum of 10 datapoints on the previously mentioned diazotrophic targets. Note that in all  
19 datasets the two UCYN-A phylotypes (A1 and A2) were not distinguished, and het-3 was  
20 excluded since it was rarely quantified. The meta-analysis was conducted using the software  
21 OpenMEE ([Wallace et al., 2016](#)) (based on R package 'metafor'), where correlation  
22 coefficients from Spearman's rank were z-transformed (Fisher's) and tested using weighted  
23 random effect models. Graphical visualization of the mean abundances of the most numerous  
24 diazotrophs across the cruise transect was also performed in IBM SPSS (ver. 23).

## 3 Results

### 3.1 Hydrographic conditions

Near surface (0-5m) DIN concentrations were below the quantification limit (bq) in both the MA and SG regions, while the mean surface DIP and DiSi concentrations were below the quantification limit or low across all stations in the MA (bq-0.08  $\mu$ M and 0.54-0.56  $\mu$ M, respectively) and significantly ( $p < 0.001$ ; t-test) higher ( $0.18 \pm 0.07$   $\mu$ M and  $0.79 \pm 0.04$   $\mu$ M, respectively) at the stations in the SG (Table 1). The upper 25-30 m of depth throughout the cruise transect had stable temperatures of 29-30 °C, but declined differently in deeper waters of the MA compared to the SG (Suppl. Fig. 2). The depth of the deep chlorophyll maximum (DCM) was between 70-165 m, except for LD B (DCM at 35 m), which was sampled during a degrading surface phytoplankton bloom, and a 30-day composite of the surface chlorophyll *a* (Chl *a*) confirmed the decreasing level of surface fluorescence measured by the CTD package at LD B (data not shown).

### 3.2 Cross reactivity tests

No amplification was detected for the newly designed UCYN-A1 host oligonucleotides run with the UCYN-A2 as template DNA and vice versa (Suppl. Fig. 1a-b).

Running the het assay in fast mode showed a lower cross-reactivity between the het-1 assay and the het-2 template than vice versa (the het-2 assay and het-1 template) (Suppl. Fig. 1e-f).

In fact, no amplification was detected in the last two template additions and the Ct differences were  $> 9$  when het-1 assay was run with het-2 templates. The UCYN-A2 assay detected the UCYN-A1 template in all but the last template addition and with Ct differences  $> 3$  (1 order of magnitude) while there was a 18-20 difference in Ct value (less gene copies) when UCYN-A1 assay was run in fast mode with UCYN-A2 templates at either annealing temperature (60° C or 64° C) and only the first three template additions ( $10^8$ - $10^6$  *nifH* copies  $\mu$ L<sup>-1</sup>) were detected (Suppl. Fig. 1c-d).

### 3.3 Comparison of ‘at sea’ and lab-based qPCR

In order expedite the sample processing for the ‘at sea’ qPCR, a shortened and modified DNA extraction protocol was performed, 4 depths were sampled, and 4 targets run (UCYN groups).

In total, 44 samples can be compared with results from the parallel archive samples and we considered only when there was at least one order of magnitude difference in detection. A summary of the comparison, including the difference in *nifH* copy abundance is provided in Suppl. Table 2.

In general, the ‘at sea’ and lab based qPCR were similar in quantifying the targets.

Discrepancies were noted in 7, 8 and 11 samples, which had higher detection in the ‘at sea’ analyses for UCYN-A1, UCYN-A2 and UCYN-B, respectively. There were fewer instances (3, 4, and 5, respectively) of samples processed in the lab with the full extraction that had higher abundances for the UCYN-A1, UCYN-A2 and UCYN-B, respectively.

### 3.4 Horizontal and vertical distributions

*Trichodesmium* and UCYN-B were the most abundant diazotrophs and abundances ranged  $10^4$ - $10^6$  *nifH* copies L<sup>-1</sup> at multiple depths (4-6 depths) in the upper water column (0-35 m) (Fig. 1-2; Suppl. Table 3). *Trichodesmium* represented 80-99% of total *nifH* genes detected at 9 out of 17 stations with highest detection in the MA and low to bd in the SG. Microscopy observations and abundances of *Trichodesmium* spp. confirmed a high abundance of free filaments of *Trichodesmium* and *C. watsonii*-like cells at LD B, while colonies were in general rarely observed (Suppl. Table 5).

At stations where *Trichodesmium* was not the most abundant diazotroph (e.g. SD 2, 6, 7, 14, 15, and LD C), UCYN-B had the highest depth integrated *nifH* copy abundance. UCYN-B was also the most consistently detected diazotroph, and was quantifiable from all stations sampled accounting for for 81-100% of the total detected *nifH* gene copies in the SG.

1 There was also a depth dependency for maximum abundance such that the average depth  
2 maximas of *Trichodesmium* ( $1.88 \times 10^6$  *nifH* copies L<sup>-1</sup>) and UCYN-B ( $5.03 \times 10^5$  *nifH* copies  
3 L<sup>-1</sup>) at the stations in the MA were 10 and 25 m, respectively. In the SG, the average depth  
4 maximum for UCYN-B ( $1.50 \times 10^5$  *nifH* copies L<sup>-1</sup>) was the same (25 m), while the average  
5 depth of the *Trichodesmium* maximum ( $1.30 \times 10^4$  *nifH* copies L<sup>-1</sup>) deepened to 31m.

6 Of the three heterocystous cyanobacterial symbiont lineages (het-1, het-2, het-3), het-1  
7 was the most dominant (60% detection in total samples, 72 of 120 samples), and similar to  
8 *Trichodesmium*, had higher detection in the stations of the MA region. For example, at  
9 stations SD 2, 4 and 9, het-1 represented 10-15% of the total *nifH* genes quantified in the  
10 depth profiles, but in the total *nifH* genes quantified across the entire transect, het-1 only  
11 represented 1.5 %. Abundances for het-1 ranged between  $10^3$ - $10^5$  *nifH* copies L<sup>-1</sup> (15 of the 18  
12 stations) at multiple depths (0-90 m) and the average depth maximum at MA stations ( $3.11 \times$   
13  $10^4$  *nifH* copies L<sup>-1</sup>) was closer to the surface (15 m) compared to the SG stations ( $1.63 \times 10^3$   
14 *nifH* copies L<sup>-1</sup>; 60 m) (Fig. 1; Suppl. Table 3). Het-2 and het-3 co-occurred with het-1,  
15 however at lower abundances ( $10^2$ - $10^4$  *nifH* copies L<sup>-1</sup>) and often bd. For example, het 2 and  
16 het-3 were bd at all depths sampled in 1 and 3 stations, respectively, located in the SG. The  
17 average depth of maximum abundance (17 m) for het-2 ( $3.89 \times 10^3$  *nifH* copies L<sup>-1</sup>) was similar  
18 to het-1 (15 m), while het-3 ( $1.53 \times 10^3$  *nifH* copies L<sup>-1</sup>) was deeper at 33 m (considering only  
19 the MA stations). Microscopy observations confirmed the presence of *R. intracellularis* at 5  
20 SD stations of the MA and LD B and absence at the SD stations and LD C of the SG.  
21 Noticeable was the co-occurrence of free filaments of *R. intracellularis* and degrading diatom  
22 cells (mainly belonging to the genus *Rhizosolenia*), especially at the SD 5, 6 and 7.

23 The unicellular symbiotic groups, UCYN-A1 and A2 (and their respective hosts), were  
24 the least detected targets. For example, UCYN-A1 was bd in 53% (63 of 120 samples) and  
25 UCYN-A2 was bd in 66% (79 of 120 samples) of samples. UCYN-A1 and A2 represented <



0.4 % of total *nifH* genes detected and UCYN-A symbionts were bd in the SG, except at LD C. When detected, average *nifH* abundance for UCYN-A1 and A2 were  $8.60 \times 10^4$  and  $4.60 \times 10^4$  *nifH* copies L<sup>-1</sup>, respectively, and usually accounted for <1.0-1.5 % of the total *nifH* copies enumerated per station. One exception was at LD C in the SG, when UCYN-A1 and A2 accounted for 4 and 11%, respectively, of the total *nifH* gene copies, and were the second most abundant diazotroph ( $3.19 \times 10^4$  and  $8.53 \times 10^4$  *nifH* copies L<sup>-1</sup>). The average depth of maximum *nifH* abundance for the UCYN-A1 ( $1.60 \times 10^4$  *nifH* copies L<sup>-1</sup>) and A2 ( $5.76 \times 10^3$  *nifH* copies L<sup>-1</sup>) symbionts was consistently recorded at deeper depths (55 and 58 m, respectively; 10 % light level).

The detection of the UCYN-A1 and A2 hosts mirrored the detection of their respective symbionts. However, in 22 and 15 samples, respectively, the UCYN-A1 and A2 symbionts were quantified while their hosts were bd. The UCYN-A hosts were never detected in samples where their respective symbionts were bd or dnq. When both UCYN-A host and symbiont were present, the abundances of the hosts were always one order of magnitude less than their respective symbionts, with the exception of two samples for UCYN-A1 symbionts where their respective host abundances were half, or nearly equal in abundance. UCYN-C was the least abundant unicellular diazotroph and was only quantified in the ‘at-sea’ qPCR where detection was poor and limited to the MA region (3 of 11 stations: 1-3 of 4 depths sampled) and abundances never exceeded  $10^2$  *nifH* copies L<sup>-1</sup> (Suppl. Table 3).

### **3.5 Diazotroph and UCYN-A host covariation**

Several significant correlations between the target diazotrophs and hosts were identified (Fig. 3; Suppl. Table 4a). The *nifH* gene copy abundances of *Trichodesmium* and UCYN-B were significantly positively correlated with each other ( $N=108$ ,  $p<0.01$ ). In addition, UCYN-B *nifH* gene copy abundance was significantly positively correlated with those of both UCYN-A symbionts (A1 and A2;  $N=120$ ,  $p<0.01$ ) and UCYN-A2 host abundance ( $N=118$ ,  $p<0.04$ ).

Abundances of UCYN-A1 and A2 were significantly positively correlated with each other, and in addition, with their respective host abundances (N=118-120, p<0.01). Lastly, the *nifH* copy abundances for het-1, het-2 and het-3 were significantly positively correlated with one another, and with the *nifH* copy abundances of *Trichodesmium* and UCYN-B (N=108-120, p<0.01). The only correlations that were not significant were between the UCYN-A (including their hosts) and *Trichodesmium* and the het-groups (with the exception of het-3, which correlated with the UCYN-A2 host (N=118, p<0.04)).

### **3.6 Influence of environmental conditions on diazotroph and UCYN-A host abundances in the WTSP**

The abundances of UCYN-A1 and A2 were significantly positively correlated with salinity (N=107, p<0.02 and N=107, p<0.03, respectively) and depth (N=118, p<0.01 and N=118, p<0.002, respectively) (Fig. 3; Suppl. Table 4b). However, except for het-3 (regarding depth), all other diazotrophs were significantly negatively correlated with salinity (N=97-108, p<0.006) and depth (N=108-120, p<0.001). Moreover, *Trichodesmium*, UCYN-B, and the het-group (except het-3) were significantly positively correlated with PAR (N=63-72, p<0.003) and temperature (N=97-108, p<0.001) while UCYN-A1 and A2 were significantly negatively correlated (N=72-108, p<0.02) with the latter parameters. All diazotrophic targets, except UCYN-A1, UCYN-A2, and het-3, were significantly negatively correlated with DIN concentration (N=90-94, p<0.02). Similarly, all diazotrophs, except UCYN-A2, were significantly negatively correlated with DIP concentration (N=96-100, p<0.02), and all diazotrophs except UCYN-A1, A2 and het-3 were significantly negatively correlated with DiSi concentration (N=97-102, p<0.001). The abundances of UCYN-A hosts, UCYN-A1 and UCYN-A2, and UCYN-B were significantly correlated with dissolved oxygen (UCYN-A and hosts, N=106-108, p<0.003 and UCYN-B, N=108, p<0.03). In general, the correlations

1 between abundances and several hydrographic parameters divided the diazotrophs into two  
2 groups: the UCYN-A symbionts (and respective hosts) and all other diazotrophs.

3 Hierarchical clustering based on the Spearman's rank analyses resulted in the two major  
4 groups: (1) a shallow and (2) deeper euphotic zone, inferred from the negative and positive  
5 correlations, respectively, with depth (Fig. 3). For example, *Trichodesmium* and the symbiotic  
6 het-1 and het-2 lineages characterize an upper water column group 1 with significant  
7 clustering and positive correlations with temperature (N=97-108,  $p<0.001$ ) and PAR (N=63-  
8 72,  $p<0.003$ ), while only UCYN-A1 and A2 symbionts and their respective hosts represent  
9 group 2. UCYN-B was unique in an overlapping distribution, and resulted in positive  
10 significant correlations with both the shallow (group 1) and deep (group 2) euphotic zone  
11 diazotrophs (e.g. *Trichodesmium*, N=108,  $p<0.001$  and UCYN-A1, N=120,  $p<0.004$ ,  
12 respectively). The deeper dwelling group 2 significantly clustered and correlated positively  
13 with oxygen, depth, salinity and fluorescence (N=108-120,  $p<0.03$ , except for UCYN-A2 and  
14 fluorescence, N=108,  $p=0.053$ ). Despite clustering with group 1, het-3 was less robust in a  
15 negative correlation with salinity (N=108,  $p=0.005$ ).

16 The results from the Spearman's rank correlations were further confirmed and  
17 visualized in the RDA biplot (Fig. 4a), which explains parameter importance (Fig. 4b).  
18 Correlations with nutrients and PAR were omitted due to the limited number of data points.  
19 Fluorescence, depth and salinity correlated positively with each other and negatively with  
20 temperature, while oxygen was not significantly correlated with any other environmental  
21 parameters. The response variables UCYN-A1 and A2 and their respective hosts clustered  
22 with the explanatory variables: fluorescence, salinity and depth, with a dependency towards  
23 oxygen. On the other hand, the shallower euphotic group 1 (response variables  
24 *Trichodesmium*, het-1 and het-2) clustered closer to explanatory variable temperature. In  
25 addition, most of the observed variance is explained by the two axes RDA1 (72 %) and RDA2

(22 %), indicative of depth and temperature, respectively, as the most important environmental parameters for diazotroph abundance in our study. Together they form a depth-temperature gradient (RDA1) where *Trichodesmium* occupies the warmest and shallowest waters, and UCYN-A occupies the coldest and deepest waters, among the investigated cyanobacterial diazotrophs.

### **3.7 Global drivers of diazotrophic abundance**

We found consistency between our results in the WTSP and the correlations identified in the 11 external datasets by the non-parametric correlation analyses and meta-analyses (Fig. 5a-d; Suppl. Table 6). For example, in three of the external datasets, abundances of *Trichodesmium* spp., UCYN-B, and het-1, were significantly positively correlated with temperature and negatively correlated with the same three parameters as in our study in the WTSP: salinity, DIP, and DIN. The latter correlations were identified in two regions of the WTSP (tropical and subtropical) and in the northern South China Sea (NSCS). In contrast to a significant positive correlation between UCYN-A abundance and depth reported here in the WTSP, UCYN-A abundance was negatively correlated with depth in 4 of the 11 external datasets (two regions of the WTSP, Tropical Atlantic (TA), and NSCS). Moreover, and consistent with several of the other diazotrophs (*Trichodesmium*, UCYN-B, het-1), UCYN-A abundance was negatively correlated with DIP and DIN concentrations (5 and 3 additional external datasets, respectively) (Suppl. Table 6).

Meta-analysis revealed similar groupings (e.g. shallow and deep) as observed in the WTSP, however, the significance was less robust (Fig. 5a-d; Suppl. Table 6). For example abundances of *Trichodesmium* and het-1 and het-2 were significantly positively correlated with temperature and negatively correlated with salinity ( $p < 0.05$ ). No significance was found for UCYN-A abundance for the latter parameters, and UCYN-B abundance was not significantly correlated with salinity and significantly positively correlated with temperature

( $p < 0.05$ ). In addition, UCYN-A was the only diazotroph that was not significantly correlated with het-2, while all other diazotrophs had a significant positive correlation with het-2 ( $p < 0.05$ ). Similar to our findings reported for the WTSP, all diazotrophs, except UCYN-A, correlated significantly negatively with depth, DIP and DIN concentrations ( $p < 0.05$ ) (except het-2 with DIP which was not significant). Finally, UCYN-B and het-1 abundances were significantly negatively correlated with chl *a* ( $p < 0.05$ ), while *Trichodesmium*, UCYN-A and het-2 were not.

## **4 Discussion**

### **4.1 Environmental conditions in the WTSP**

The SP is one of the most oligotrophic regions of the world's oceans with chronically low dissolved nutrient concentrations, especially DIN, and thus, is considered an area primed for  $N_2$  fixation. Likewise, we encountered surface hydrographic conditions in the WTSP that were consistently low in dissolved nutrient concentrations and similar to earlier reports for the equatorial Pacific (Bonnet et al., 2009; Dufour et al., 1999; Moutin et al., 2008; Van Den Broeck et al., 2004). The conservative tracers of temperature and salinity remained constant in the surface between the MA and SG regions, hence the elevated nutrient concentrations in the SG is likely not related to an eddy intrusion. The deviation away from a 16:1 relationship (Redfield ratio) (data not shown) in the upper 125 m in both regions (MA and SG) was indicative of DIN limitation. The low DIP concentrations in MA waters suggest utilization of DIP by diazotrophs in the absence of DIN, and likely other sources of nitrogen were available, e.g. dissolved organic nitrogen or  $N_2$  fixation (Karl et al., 2001).

### **4.2 Detection of diazotrophs and application of 'at sea' qPCR**

*Trichodesmium*, UCYN-B, and the het-groups are easily identifiable by standard epi-fluorescence microscopy, and so these populations can readily be observed 'at sea'. However, the UCYN-A1 and UCYN-A2, and their respective hosts, require a lengthy fluorescent *in situ*

1 hybridization (FISH) protocol that is difficult to implement in the field. On the other hand,  
2 nowadays oceanographers have a suite of other molecular genetic tools, some of which are  
3 also ‘sea-going’ and autonomous (e.g. Robidart et al. 2014; Ottesen et al. 2013; Preston et al.  
4 2011), thereby making quantification of microscopically unidentified microorganisms  
5 tangible by quantifying their genes, simultaneous with collection of hydrographic data. Here,  
6 we showed a rather efficient, steadfast (within 3 hrs of sample collection), and ‘sea-going’  
7 nucleic acid extraction and qPCR to quantify diazotrophs by their *nifH* gene, which was used  
8 in real time during the OUTPACE cruise to help locate the LD stations for the purpose of the  
9 project (see Moutin et al., this issue). The comparisons of the ‘at sea’ assays to the lab-based  
10 full extraction protocol and qPCR on archived samples indicated that the assays were  
11 consistent ([Suppl. Fig. 3a-c](#)), and surprisingly the shortened DNA extraction performed ‘at sea’  
12 had higher abundances for all three targets (UCYN-A1, UCYN-A2 and UCYN-B) in 16-25 %  
13 of the samples processed, depending on the target diazotroph.

14 [The disparity between the enumerations made ‘at sea’ and in the lab-based samples could](#)  
15 [result from technical and/or sampling differences. For example, we do not know the DNA](#)  
16 [extraction efficiency of either method used \(‘at sea vs. lab based\), nor if extraction efficiency](#)  
17 [varies for a particular target e.g. UCYN-A or UCYN-B. Variations between samples or](#)  
18 [replicates could be attested to different DNA extractions varying in their efficiencies based on](#)  
19 [target organism \(Boström et al., 2004\). Some strains of UCYN-B are known to secrete thick](#)  
20 [extracellular matrix \(ECM\) \(Sohm et al. 2011\), while others form dense colonies, and some](#)  
21 [are symbiotic with diatoms \(Carpenter and Janson, 1999\). Moreover, the UCYN-A symbioses](#)  
22 [are considered fragile and easily dismantled \(Thompson et al., 2012\). The latter observations](#)  
23 [could potentially result in differences in extraction efficiency, which is supported by](#)  
24 [significant disparities in all samples where the UCYN-A hosts were enumerated. However we](#)  
25 [find no clear pattern in higher detection for one method \(‘at sea’ vs. lab-based assays\) or one](#)

particular target. Despite taking the samples from the same niskin bottle for the archived and ‘at sea’ assays, we cannot discount the natural heterogeneity of plankton and differences in settling, and that perhaps some samples were more enriched than others. Seldom are replicates processed in qPCR studies as those presented here, and so the disparity reported here highlights the need to address variation derived from sampling and/or extraction efficiencies. Nonetheless, ‘at sea’ (and lab-based) qPCRs could also be appended with a multi-plexing approach to both increase and broaden the number of metabolic pathways (e.g. *narB*, *rbcL*, *nirS*) and/or phylotypes quantified simultaneously.

#### 4.3 Abundance and vertical distribution of diazotrophs in the WTSP

Earlier work based on N isotope ratios ( $\delta^{15}\text{N}$ ) of suspended particulate matter and dissolved organic N (DON) in the WTSP suggested that new production is likely fueled by  $\text{N}_2$  fixation in this region (Hansell and Feely, 2000; Yoshikawa et al., 2005). The SP is also an area where high abundances of the unicellular diazotrophs, in particular UCYN-A and UCYN-B, have been previously reported (Biegala and Raimbault, 2008; Bonnet et al., 2009, 2015; Moisander et al., 2010) and account for a significant (74%) portion of the areal  $\text{N}_2$  fixation (Bonnet et al., 2009). Hence, it was likely to encounter the presence of diazotrophic populations.

Recently UCYN-A and its various lineages have been highlighted as one of the most widespread and abundant diazotrophs (Farnelid et al., 2016 and references therein), which has led to the dramatic shift in the canonical paradigm of *Trichodesmium* as the only significant diazotroph. Surprisingly, here, we report abundances of the UCYN-A1 and UCYN-A2 lineages that are comparatively lower than earlier reports. In fact, UCYN-A1 and A2 were the least detected diazotrophs. Both UCYN-A phylotypes were largely restricted to the MA, with the exception of high densities ( $3.2 \times 10^4$  and  $8.5 \times 10^4$  *nifH* copies  $\text{L}^{-1}$ , respectively) found at one depth (60 m) of LD C, which borders the MA region. Consistent with higher UCYN-A

biomass at depth at LD C were microscopy observations of high abundances of picoeukaryotes similar in size and shape previously reported for the UCYN-A hosts (Krupke et al. 2013). The vertical distribution of UCYN-A1 (and A2) was similar to Moisander's et al. (2010) and others, including earlier studies in the North Pacific Ocean (NP) and NA, where maximum abundances of UCYN-A are common to deeper depths in the euphotic zone (below 45 m) (e.g. Bonnet et al., 2015; Foster et al., 2007; Goebel et al., 2010; Needoba et al., 2007). Likewise, we also observed as others (Cabello et al., 2016) that the UCYN-A based symbioses co-occur and typically have decreased abundance towards the DCM, and maximum abundances slightly above the nitracline.

Unlike UCYN-A phylotypes, UCYN-B and *Trichodesmium* were the most abundant diazotrophs in the WTSP, and UCYN-B in particular was the most detected phylotype (99% detection; dnq or higher in 119 of 120 samples). High abundances of *Trichodesmium* in the upper 10 m, including presence of surface slicks and free filaments, was widespread in the MA region and consistent with earlier observations of high surface densities further north in the SP (Moisander et al., 2010; Shiozaki et al., 2014). Surface slicks have also been reported elsewhere, e.g. the North Atlantic (NA) (Goebel et al., 2010; Langlois et al., 2005). The depth of maximum abundance for *Trichodesmium* deepened from the MA (10 m) region to the open gyre (SG, 31 m), which was similar to earlier reports in the equatorial Pacific (Bonnet et al., 2009). A niche partitioning has been suggested for *Trichodesmium* and unicellular diazotrophs in the SP (Bonnet et al., 2015; Moisander et al., 2010) and elsewhere (Goebel et al., 2010; Langlois et al., 2005; Messer et al., 2015). However, here in the WTSP, *Trichodesmium* abundance was correlated with UCYN-B, which is consistent with previous studies in other ocean basins, e.g. Atlantic Ocean (Foster et al., 2007, 2009; Langlois et al., 2008), and the South China Sea (Moisander et al., 2008). UCYN-B co-occurred with *Trichodesmium* in the surface samples, although at lesser *nifH* copy abundances, and more often UCYN-B had



1 subsurface maxima (35-70 m) in both regions (MA and SG) of the transect. The latter is also  
2 consistent with Moisander et al. (2010) who observed maximum abundances of UCYN-B  
3 north of the Fijian islands at 37m.

4 All 3 heterocystous symbiont phylotypes co-occurred and were widespread in the MA,  
5 with het-1 as the most abundant and most highly detected het group (70% detection or 84 of  
6 120 samples). The early work of Moisander et al. (2010) detected het-1 in all but one of 26  
7 stations sampled (56% detected, or 56 of 100 samples), and highest *nifH* copy densities were  
8 reported north east of our cruise transect. Moreover, Bonnet et al. (2015) detected het-1 and  
9 het-2 at the surface of one out of 10 stations west (approximately 10 degrees W) of our cruise  
10 transect. Het-2 and het-3 were not quantified by Moisander et al. (2010) and het-3 was not  
11 quantified by Bonnet et al. (2015). Therefore our study is among the first to report on the  
12 abundances and distributions for all 3 heterocystous diazotrophs in a large expanse of the SP.  
13 The 3 het phylotypes were however recently reported from a mesocosm (enclosed design)  
14 experiment in the Noumea lagoon, a low nutrient low chlorophyll (LNLC) region located  
15 along the New Caledonian coast (Turk-Kubo et al., 2015). In fact, het-1 and het-2 were among  
16 the most abundant diazotrophs in the first half of the experiment (Turk-Kubo et al., 2015).  
17 Two additional earlier studies have also reported microscopic observations of free-living  
18 *Richelia* in the same lagoon (Biegala and Raimbault, 2008; Garcia et al., 2007).

19 Highest densities ( $10^4$ - $10^6$  *nifH* copies L<sup>-1</sup>) of the *Richelia* phylotypes were restricted to  
20 the western region of the MA, and in the upper 12 m, which is shallower than the subsurface  
21 maximum (25 m) commonly reported for het-1 (and het-2) in the Western Tropical North  
22 Atlantic (WTNA) and NP (Church et al., 2005; Foster et al., 2007; Goebel et al., 2010). Our  
23 microscopy observations from SD 5-7 and LD A indicated that near surface *Rhizosolenia*  
24 populations were in a moribund state since frustules were broken and free filaments of  
25 *Richelia* were observed. Our observations also coincide with a region of high backscattering

measurements in the upper water column (5-30 m) (Dupouy et al., this issue). Het-1 *nifH* copies were 4 orders of magnitude higher in abundance in the moored sediment traps of LD A (325 m:  $2.0 \times 10^7$  *nifH* copies L<sup>-1</sup>) and LD B (325 and 500m:  $5.8 \times 10^6$  and  $1.10 \times 10^7$  *nifH* copies L<sup>-1</sup>, respectively) (Caffin et al., this issue) than the *nifH* copies detected in the overlying waters ( $3.11 \times 10^3$  *nifH* copies L<sup>-1</sup> and  $4.1 \times 10^2$  *nifH* copies L<sup>-1</sup>, respectively). Combined, the latter observations suggest that a higher density of the het-1 population was likely present prior to our sampling and perhaps derived from a ‘seed’ population originating in the coastal regions of New Caledonia, and that they play an important role for export production in this region, as has previously been shown in e.g. the NP (Karl et al., 2012).

The UCYN-C phylotype was poorly detected in the ‘at sea’ assays (61% samples were bd and maximum abundance was  $5.0 \times 10^2$  *nifH* copies L<sup>-1</sup>), and as such was not enumerated in the archived samples. The low detection of UCYN-C is consistent with Taniuchi et al. (2012), who estimated that UCYN-C only represented a small portion of diazotrophs detected in the western Pacific (Kuroshio Current). However, a recent study reported relatively high UCYN-C abundances in the open waters of the Solomon Sea (north of the MA) (Berthelot et al., submitted). UCYN-C has also been observed in the New Caledonian lagoon (Turk-Kubo et al., 2015), where it was the most dominant diazotroph in the first part of the aforementioned mesocom experiment (Turk-Kubo et al., 2015). Moreover, Turk-Kubo et al. (2015) reviewed the specificity of the UCYN-C assay used in our study (Foster et al., 2007) and concluded that it does quantify a majority of UCYN-C phylotypes. Hence, like most plankton, abundances can be patchy as was observed with UCYN-C in our study.

#### **4.4 UCYN-A and host (co)-occurrence**

Earlier and recent work has suggested a high host dependency (e.g. smaller and streamlined genomes), and selectivity in the UCYN-A based symbioses (Cabello et al., 2016; Cornejo-Castillo et al., 2016; Farnelid et al., 2016; Krupke et al., 2013, 2014; Thompson et al., 2012;

1 Tripp et al., 2010). Moreover, the UCYN-A partnerships are also considered mutualistic,  
2 where the host and symbiont both benefit by exchange of metabolites (e.g. reduced C and N,  
3 respectively) (Krupke et al., 2014; Thompson et al., 2012); hence one would expect parallel  
4 distributions for both partners. Some have argued that the partnership is also obligatory since  
5 few observations of free-living hosts have been reported and abundances of free symbionts  
6 assumed to be derived from disruption during sample preparation are always correlated with  
7 their hosts (Cabello et al., 2016; Krupke et al., 2014; Thompson et al., 2012). Thus, by use of  
8 our newly designed oligonucleotides for the UCYN-A1 host and previously designed  
9 oligonucleotides for the UCYN-A2 host (Thompson et al., 2014), we unexpectedly found that  
10 both UCYN-A1 and A2 were often (89% and 59%, respectively; not considering dnq)  
11 detected in the absence (or bd) of their respective hosts, while the hosts, when detected,  
12 always coincided with increased UCYN-A abundance. Our observations could result if the  
13 UCYN-A lineages can live freely, or in either a loose association, or perhaps with a wider  
14 range of hosts than previously thought and detected by the UCYN-A host assays. Presence of  
15 UCYN-A in the absence of their respective hosts could also indicate that the growth of  
16 symbiont and host is asynchronous, a pattern reported once in the *het-1* or *Rhizosolenia*-  
17 *Richelia* symbioses (Villareal 1989).

18         The number of cells per partner lineage is considered specific as well, such that 1-2  
19 UCYN-A1 cell is associated with a prymnesiophyte partner (UCYN-A1 host) and the larger *B.*  
20 *bigelowii* (UCYN-A2 host) host associates with multiple and variable numbers of UCYN-A2  
21 cells to compensate for its higher N requirement (Cornejo-Castillo et al., 2016). On the  
22 contrary, we found evidence that there are multiple UCYN-A1 and A2 symbionts in both host  
23 types, which is somewhat surprising given that the host target gene (18S rRNA) is a multiple  
24 copy gene, meaning that we would expect higher gene copy numbers for each host.  
25 Nonetheless, we consistently observed higher abundances for the UCYN-A1 and A2

symbionts than their respective hosts. UCYN-A1 and A2 were 2-10 and 6-34 times, respectively, more abundant than their hosts. A symbiosome-like compartment has also been described attached to the UCYN-A2 host or residing free (Cornejo-Castillo et al., 2016). Thus, one plausible explanation for the higher abundances of the UCYN-A2, in particular, in the absence of their respective host, could result if our assays quantified UCYN-A2 residing in a dislodged free-floating symbiosome, or an overestimate of the UCYN-A2 due to cross-reactivity with UCYN-A3 lineage as expected by *in silico* tests (Farnelid et al. 2016). It is less likely that the UCYN-A2 was overquantified due to cross-reaction with UCYN-A1 templates since our cross-reactivity tests showed a weak cross reaction (see below).

#### **4.5 Environmental influence on diazotroph abundances and distributions**

The annual N inputs through biological N<sub>2</sub> fixation in the oceans is considered high, ranging 100-200 Tg N (Eugster and Gruber, 2012; Luo et al., 2012), yet large uncertainties remain in what factor(s) influence the abundance, distribution, and activity of marine diazotrophs. Initially, we hypothesized that conditions favoring a particular cyanobacterial diazotroph would differ given the contrasting life histories (free-living, colonial, and symbiotic). Moreover, we also suspected that the conditions promoting DDAs would differ from those influencing the UCYN-A based symbioses given the vast differences in the symbionts and hosts (e.g. genome content of symbiont, cell size of symbiont and hosts in the two systems; expected number of symbionts/host; host phylogeny: diatom vs. prymnesiophyte). Thus, determining the condition or sets of conditions that drive cyanobacterial diazotroph distribution, abundance, and activity is of great interest.

Hydrographic conditions and dissolved nutrient concentrations measured at the time of sampling were used to correlate diazotrophic abundance with various environmental parameters. Consistently, in two independent statistical tests, two groups emerged in the WTSP: 1) UCYN-A1 and A2 and their respective hosts 2) het-1, het-2 and het-3, UCYN-B

1 and *Trichodesmium*. Thus, agreeing with our initial hypothesis that conditions favoring the  
2 UCYN-A based symbioses does differ from the conditions for DDAs, and in addition for the  
3 free-living cyanobacterial diazotrophs.

4 Temperature is often cited as the most important driver of diazotroph abundance and  
5 distribution (Messer et al., 2016; Moisander et al., 2010). As shown earlier in the WTSP, both  
6 *Trichodesmium* spp. and UCYN-B were most abundant in warmer surface waters (> 27 °C) in  
7 the north, while UCYN-A dominated in the cooler (24-26 °C) southern waters of WTSP  
8 (Bonnet et al., 2015; Moisander et al., 2010). Likewise, we found similar abundances and  
9 temperature optima for the latter three diazotrophs and significant correlations between the  
10 various diazotrophs and temperature. In fact, all diazotrophs, except the UCYN-A lineages  
11 were significantly positively correlated with temperature in the WTSP. In addition to  
12 temperature, environmental parameters PAR, salinity and depth were also significantly  
13 influencing abundance and distribution. Moreover, the latter two variables drove the  
14 abundances of UCYN-A symbioses (A1 and A2) apart from the rest of the diazotrophs in the  
15 WTSP, including both free-living phylotypes and the symbiotic heterocystous lineages.

16 The maximum abundances at depth for UCYN-A1 and UCYN-A2 were slightly above  
17 or at the nitracline and coincided with higher measures of fluorescence from the CTD. The  
18 latter is consistent with observations of high UCYN-A abundances in coastal habitats  
19 (Bombar et al., 2014), estuaries (Messer et al., 2015), or in waters that are recently entrained  
20 with new nutrients (Moisander et al., 2010). Increased *nifH* copies and/or *nifH* gene  
21 expression for UCYN-A have also been reported from bioassay experiments amended with  
22 nutrients, including DIN, phosphate and iron (Krupke et al., 2015; Langlois et al., 2012;  
23 Moisander et al., 2012). The latter is in contrast with the data reported here in the WTSP  
24 (including the meta-analysis) and several of the external datasets (e.g. WTSP, TA, NA,  
25 NSCS), which finds a negative correlation between DIN and DIP concentrations and

1 abundance of most of the diazotrophs, including UCYN-A. In the WTNA, waters with high  
2 DiSi concentration and low N:P ratios, driven by a disproportionate utilization of N relative to  
3 P, results in consistent and widespread blooms of the *Hemiaulus-Richelina* symbioses (het-2)  
4 (Foster et al., 2007; Subramaniam et al., 2008). Across the cruise transect, DIP and DiSi  
5 concentrations were considered not limiting (Thierry Moutin, this issue), while DIN was  
6 below detection, hence conditions favoring symbiotic diatoms, and as reported here, the  
7 higher abundances of het-1 *nifH* gene copies and observations of *Rhizosolenia* hosts in the  
8 MA.

9 All the diazotrophs described here are either photoautotrophic or associated with  
10 photoautotrophic partners (UCYN-A, het-group). Therefore, light irradiance (e.g PAR) and  
11 availability will impact the abundance and distribution of the diazotrophic populations.  
12 Moreover, and related to light availability is the influence of day length or changes in the  
13 photoperiod which can influence diazotroph distribution, in particular the symbiotic diatoms  
14 (Karl et al., 2012). Results from CARD-FISH observations of the UCYN-A1 and A2  
15 symbioses have reported a strong dependency on light intensity, which results in higher  
16 abundances nearer to the surface (Cabello et al., 2016). Presence in shallower waters is also  
17 thought to be strategic for avoiding competition (Cabello et al. 2016). However, in the WTSP,  
18 in 11 of the 14 stations where UCYN-A1 and A2 were detected at sub-surface depth maxima,  
19 the same lineages (and corresponding hosts) were undetected at the surface and a negative  
20 correlation was found with PAR. Microscopy observations also confirmed higher numbers of  
21 pico-eukaryotes at depth. Hence, it would appear that low light was a pre-requisite for high  
22 abundances of UCYN-A; while the other free-living diazotrophs and symbiotic het-1 and het-  
23 2 were positively correlated with PAR, and had maxima closer to the surface with higher PAR.  
24 Interestingly and unexpected was the lack of correlation between PAR and the UCYN-A host  
25 lineages, especially since it is the host partners that require light for photosynthesis.

1 In an attempt to identify the consistency in the correlation patterns identified in the  
2 WTSP with other regions of the world's ocean, the same statistical analyses were performed  
3 on 11 publically available datasets and subsequently run through a meta-analysis. Our  
4 statistical analyses provided coefficients and p-values for easy evaluation and comparisons  
5 between data sets for the influence of environmental parameter(s) and diazotrophs abundance.  
6 It confirmed that UCYN-A indeed stands out from the other diazotrophs in terms of  
7 environmental parameter influence, mainly by not being significantly correlated with  
8 temperature, which for all other diazotrophs was a significant positive correlation. In terms of  
9 temperature, UCYN-A has the lowest temperature optimum among the cyanobacterial  
10 diazotrophs, which will influence their distributions and subsequent correlation with  
11 temperature both regionally and vertically. The studies in the meta-analysis was conducted in  
12 a wide geographical range where a majority, in all ocean basins included, had no significant  
13 correlation for UCYN-A and temperature. For most other environmental parameters the  
14 pattern for UCYN-A in the WTSP does not hold true in the meta-analysis. However, for the  
15 other diazotrophs depth and salinity follow the same pattern as observed in the WTSP (except  
16 for UCYN-B which was not significantly correlated with salinity). Interestingly, UCYN-B  
17 seems to be mostly detected in the Pacific, where it also was found to be significantly  
18 negatively correlated with salinity, while in the Atlantic, perhaps due to lower detections or  
19 riverine impact, it was not significantly correlated resulting in no significant correlation in the  
20 meta-analysis overall. Furthermore, what did unify all diazotrophs in the meta-analysis were  
21 their consistent significant positive correlations with each other and significant negative  
22 correlations between abundance and concentrations of DIP and DIN, which was also observed  
23 in the WTSP, and again UCYN-A was the exception.

24 In summary, the correlations observed in the WTSP were not always consistent with the  
25 meta-analysis of the external datasets. We attribute the inconsistencies in part to seasonal

differences in sample collections, and the impact of an individual environmental parameter or sets of parameters on a local and regional scale, particularly for coastal studies, that make it difficult to unambiguously explain the abundance and distribution patterns. Unlike our initial hypotheses, determining the condition or sets of conditions favoring one diazotroph or life history strategy (free-living vs. symbiotic) is complex and likely not all diazotrophs are influenced by the same condition in time and space.

#### **4.6 Estimation of diazotrophs by nifH qPCR**

When interpreting abundance estimates by qPCR there are a few assumptions to keep in mind.

A caveat of qPCR assays assumes that there is one gene copy per cell. However, recent evidence in filamentous and heterocystous cyanobacteria reports evidence of polyploidy dependent on cell cycle (Griese et al., 2011; Sargent et al., 2016; Sukenik et al., 2012). Moreover, *Trichodesmium* may contain up to 100 genome copies per cell (Sargent et al., 2016), thus a potential for overestimation. On the other hand, underestimation by qPCR is also plausible if one considers that DNA extraction efficiency is not 100% and can vary between species and DNA extraction kits (Mumy and Findlay, 2004), and if high probe specificity favors exclusion of closely related phylotypes for a particular target or lineage.

A final consideration with qPCR as shown here, is the degree of cross-reactivity in assays targeting closely related lineages (e.g. UCYN-A and het). Oligonucleotide specificity as a source of underestimation of the UCYN-A lineages was recently reviewed by a *de nova* analyses (Farnelid et al., 2016) showing the potential to underestimate UCYN-A sublineages since the widely used oligonucleotides for UCYN-A1 contains several mismatches to the other UCYN-A sublineages. The latter becomes important when the sublineages co-occur. Here, however, we highlight the potential to overestimate. For example, UCYN-A2 oligonucleotides amplified the UCYN-A1 templates, indicating a tendency to overquantify UCYN-A2 in the presence of A1. Moreover, when the annealing temperature was set to 64 °C,



1 to distinguish between UCYN-A1 and A2 as recommended by Thompson et al. (2014), the  
2 assay still failed to separate the two sub-lineages when run in fast mode. Thus, the fast mode  
3 feature has a shortcoming that could influence a wider range of targets than the ones presented  
4 here. We observed the same cross-reactivity reported earlier (Foster et al., 2007) for het-1 and  
5 het-2 when run in fast mode and highlights the potential to overestimate het-2 if het-1 co-  
6 occurs at densities approximately  $10^6$  *nifH* copies L<sup>-1</sup>. The latter observation has never been  
7 reported.

## 8 **Conclusions**

9 Consistent with earlier observations in the WTSP, we found diazotrophic cyanobacteria  
10 to be abundant. The most abundant cyanobacterial diazotrophs were UCYN-B,  
11 *Trichodesmium* and the symbiotic *Richelia* lineage het-1. Although the cell integrity and  
12 detection of het-1 in water column samples and those from depth (e.g. sediment traps)  
13 indicated that the populations were in a senescent state, our work represents one of the first  
14 documentation of the three DDA populations in a wide expanse of the WTSP. In contrast to  
15 earlier work in the SP and other recent reports from global ocean surveys (Farnelid et al.,  
16 2016; Martínez-Pérez et al., 2016), we observed low abundances and poor detection of both  
17 UCYN-A (A1 and A2) lineages. According to our qPCR results, UCYN-A was also  
18 enumerated when their respective hosts were below detection, which contrasts to the assumed  
19 high fidelity and dependency in the partnerships; however, we cannot discount that the  
20 disparity in host-symbiont detection was not a result from qPCR oligonucleotide assay bias  
21 and/or overestimations indicated by our cross-reactivity tests.

22 Our initial hypothesis was that the condition or sets of conditions, which promote the  
23 distribution of one diazotroph, would differ. Moreover, the parameters for symbiotic  
24 diazotrophs should also differ from that of free-living phylotypes, and given the vast  
25 difference in hosts (diatoms and prymnesiophyte, respectively) and genome content for the het

1 and UCYN-A symbionts, we further hypothesized divergent conditions favoring one  
2 symbiosis over another. In the WTSP, the same conditions favored abundances of both the  
3 free-living phylotypes and the diatom (het groups) symbioses. However, the same conditions  
4 impacted the abundance of UCYN-A based symbiosis negatively, hence, somewhat  
5 supporting our initial hypothesis that conditions for one symbiosis type would differ. In the  
6 external datasets, however, we observed differences in environmental conditions favoring  
7 abundances of the investigated diazotrophs compared to the WTSP, which underscores that  
8 diazotrophs are not similarly influenced by the same condition in time and space.

9       Multivariate approaches on numerous parameters and with high spatial resolution are  
10 required to understand the complex and often indirect effects that govern species distribution.  
11 Finally, this study highlights reliable quantification of *nifH* genes for various N<sub>2</sub> fixing  
12 cyanobacteria ‘at sea’ in the tropical open ocean and how environmental parameters influence  
13 distribution and abundance of diazotrophs differently both regionally and across ocean basins.  
14 However, it is of great interest to know, if the same parameters influence gene expressions  
15 (e.g. *nifH*), and ultimately N<sub>2</sub> fixation rates, in the same manner, thus, understanding the  
16 weight of environmental parameters influencing diazotrophic abundance and distribution.  
17 Given the global significance of N<sub>2</sub> fixation as a major new source of N to the oceans, the  
18 metanalysis presented here could be directly applicable to improving parameter constraints on  
19 model-based approaches for predicting areas prone to diazotrophy.

## Competing interests

The authors declare that they have no conflict of interest.

## Acknowledgements

The participation (MS and AC), sample processing, and work presented here is supported by Knut and Alice Wallenberg foundation (to RAF). This is a contribution to the OUTPACE (Oligotrophy from Ultra-oligoTrophy PACific Experiment) project funded by the French research national agency (ANR-14-CE01-0007-01), the LEFE-CyBER program (CNRS-INSU), the GOPS program (IRD) and the CNES (BC T23, ZBC 4500048836). The OUTPACE cruise (<http://dx.doi.org/10.17600/15000900>) was managed by T. Moutin and S. Bonnet from the MIO (Mediterranean Institute of Oceanography). T. Moutin is specifically thanked for invaluable input and feedback on this paper. The authors thank the crew of the R/V *L'Atalante* for outstanding shipboard operation. G. Rougier and M. Picheral are thanked for their efficient help in CTD rosette management and data processing, as is Catherine Schmechtig for the LEFE CYBER database management. All data and metadata are available at the following web address: <http://www.obs-vlfr.fr/proof/php/outpace/outpace.php>. Special acknowledgement to Andreas Krupke (formerly of WHOI), Kyle Frischkorn (WHOI), Mar Benavides (MIO/IRD), Hugo Berthelot (MIO), and Mathieu Caffin (MIO). Olivier Grosso (MIO) and Sandra Hélias (MIO) are acknowledged for nutrient analyses. Additionally we thank Dr. Lotta Berntzon for assisting in sample processing and Konrad Karlsson for assistance with the multivariate statistics. Lastly, we thank Dr. Bethany Jenkins and Prof. Anders Bignert for invaluable feedback and suggestions on improvement.

## References

- Aminot, A. and K  rouel, R.: Dosage automatique des nutriments dans les eaux marines: m  thodes en flux continu, in M  thodes d'analyse en milieu marin, edited by Ifremer, p. 188. [online] Available from: <http://cat.inist.fr/?aModele=afficheN&cpsidt=18706171> (Accessed 1 December 2016), 2007.
- Benavides, M., Bonnet, S., Hern  ndez, N., Mart  nez-P  rez, A. M., Nieto-Cid, M.,   lvarez-Salgado, X. A., Ba  os, I., Montero, M. F., Mazuecos, I. P., Gasol, J. M., Osterholz, H., Dittmar, T., Berman-Frank, I. and Ar  stegui, J.: Basin-wide N<sub>2</sub> fixation in the deep waters of the Mediterranean Sea, *Glob. Biogeochem. Cycles*, 30(6), 2015GB005326, doi:10.1002/2015GB005326, 2016.
- Bench, S. R., Heller, P., Frank, I., Arciniega, M., Shilova, I. N. and Zehr, J. P.: Whole genome comparison of six *Crocospaera watsonii* strains with differing phenotypes, *J. Phycol.*, 49(4), 786–801, doi:10.1111/jpy.12090, 2013.
- Berman-Frank, I., Lundgren, P., Chen, Y.-B., K  pper, H., Kolber, Z., Bergman, B. and Falkowski, P.: Segregation of Nitrogen Fixation and Oxygenic Photosynthesis in the Marine Cyanobacterium *Trichodesmium*, *Science*, 294(5546), 1534–1537, doi:10.1126/science.1064082, 2001.
- Berthelot, H., Moutin, T., L'Helguen, S., Leblanc, K., H  lias, S., Grosso, O., Leblond, N., Charri  re, B. and Bonnet, S.: Dinitrogen fixation and dissolved organic nitrogen fueled primary production and particulate export during the VAHINE mesocosm experiment (New Caledonia lagoon), *Biogeosciences*, 12(13), 4099–4112, doi:10.5194/bg-12-4099-2015, 2015.
- Berthelot, H., Benavides, M., Moisander, P., Grosso, O., Bonnet, S.: Extremely high Nitrogen fixation rates in the particulate and dissolved pools in the Southwestern Pacific. Submitted to *Geophysical Research Letters*.
- Biegala, I. C. and Raimbault, P.: High abundance of diazotrophic picocyanobacteria (<3   m) in a Southwest Pacific coral lagoon, *Aquat. Microb. Ecol.*, 51(1), 45–53, doi:10.3354/ame01185, 2008.
- Blain, S., Sarthou, G. and Laan, P.: Distribution of dissolved iron during the natural iron-fertilization experiment KEOPS (Kerguelen Plateau, Southern Ocean), *Deep Sea Res. Part II Top. Stud. Oceanogr.*, 55(5–7), 594–605, doi:10.1016/j.dsr2.2007.12.028, 2008.
- Bombar, D., Moisander, P. H., Dippner, J. W., Foster, R. A., Voss, M., Karfeld, B. and Zehr, J. P.: Distribution of diazotrophic microorganisms and nifH gene expression in the Mekong River plume during intermonsoon, *Mar. Ecol. Prog. Ser.*, 424, 39–52, doi:10.3354/meps08976, 2011.
- Bombar, D., Heller, P., Sanchez-Baracaldo, P., Carter, B. J. and Zehr, J. P.: Comparative genomics reveals surprising divergence of two closely related strains of uncultivated UCYN-A cyanobacteria, *ISME J.*, 8(12), 2530–2542, doi:10.1038/ismej.2014.167, 2014.
- Bombar, D., Paerl, R. W. and Riemann, L.: Marine Non-Cyanobacterial Diazotrophs: Moving beyond Molecular Detection, *Trends Microbiol.*, 24(11), 916–927, doi:10.1016/j.tim.2016.07.002, 2016.

- Bonnet, S., Biegala, I. C., Dutrieux, P., Slemons, L. O. and Capone, D. G.: Nitrogen fixation in the western equatorial Pacific: Rates, diazotrophic cyanobacterial size class distribution, and biogeochemical significance, *Glob. Biogeochem. Cycles*, 23(3), GB3012, doi:10.1029/2008GB003439, 2009.
- Bonnet, S., Dekaezemacker, J., Turk-Kubo, K. A., Moutin, T., Hamersley, R. M., Grosso, O., Zehr, J. P. and Capone, D. G.: Aphotic N<sub>2</sub> Fixation in the Eastern Tropical South Pacific Ocean, *PLOS ONE*, 8(12), e81265, doi:10.1371/journal.pone.0081265, 2013.
- Bonnet, S., Rodier, M., Turk-Kubo, K. A., Germineaud, C., Menkes, C., Ganachaud, A., Cravatte, S., Raimbault, P., Campbell, E., Qu  rou  , F., Sarthou, G., Desnues, A., Maes, C. and Eldin, G.: Contrasted geographical distribution of N<sub>2</sub> fixation rates and nifH phylotypes in the Coral and Solomon Seas (southwestern Pacific) during austral winter conditions, *Glob. Biogeochem. Cycles*, 29(11), 2015GB005117, doi:10.1002/2015GB005117, 2015.
- [Bonnet, S., Berthelot, H., Turk-Kubo, K., Cornet-Barthaux, V., Fawcett, S., Berman-Frank, I., Barani, A., Gr  gori, G., Dekaezemacker, J., Benavides, M. and Capone, D.G.: Diazotroph derived nitrogen supports diatom growth in the South West Pacific: a quantitative study using nanoSIMS. \*Limnol. Oceanogr.\*, 61\(5\), pp.1549-1562, 2016.](#)
- [Bonnet, S., Caffin, M., Berthelot, H. and Moutin, T.: Hot spot of N<sub>2</sub> fixation in the western tropical South Pacific pleads for a spatial decoupling between N<sub>2</sub> fixation and denitrification. \*PNAS\*, 114\(14\), E2800-E2801, 2017.](#)
- Bonnet, S., Caffin, M., Berthelot, H., Grosso, O., Guieu, C. and Moutin, T.: Contribution of dissolved and particulate fractions to the Hot Spot of N<sub>2</sub> fixation in the Western Tropical South Pacific Ocean (OUTPACE cruise). This issue.
- [Bostr  m, K. H., Simu, K., Hagstr  m,   . and Riemann, L.: Optimization of DNA extraction for quantitative marine bacterioplankton community analysis. \*Limnol. Oceanogr-Meth.\*, 2\(11\), 365-373, 2004.](#)
- Cabello, A. M., Cornejo-Castillo, F. M., Raho, N., Blasco, D., Vidal, M., Audic, S., de Vargas, C., Latasa, M., Acinas, S. G. and Massana, R.: Global distribution and vertical patterns of a prymnesiophyte–cyanobacteria obligate symbiosis, *ISME J.*, 10(3), 693–706, doi:10.1038/ismej.2015.147, 2016.
- Caffin, M., Foster, R., Berthelot, H., Stenegren, M., Caputo, A. and Bonnet, S.: Fate of diazotroph-derived nitrogen across trophic gradients in the Western Tropical South Pacific. This issue
- Carpenter, E. J. and Janson, S.: Intracellular Cyanobacterial Symbionts in the Marine Diatom *Climacodium frauenfeldianum* (bacillariophyceae), *J. Phycol.*, 36(3), 540–544, doi:10.1046/j.1529-8817.2000.99163.x, 2000.
- Church, M. J., Jenkins, B. D., Karl, D. M. and Zehr, J. P.: Vertical distributions of nitrogen-fixing phylotypes at Stn Aloha in the oligotrophic North Pacific Ocean, *Aquat. Microb. Ecol.*, 38(1), 3–14, doi:10.3354/ame038003, 2005.
- Church, M. J., Bj  rkman, K. M., Karl, D. M., Saito, M. A. and Zehr, J. P.: Regional distributions of nitrogen-fixing bacteria in the Pacific Ocean, *Limnol. Oceanogr.*, 53(1), 63–77, doi:10.4319/lo.2008.53.1.0063, 2008.

- 1 Claustre, H. and Maritorena, S.: The Many Shades of Ocean Blue, *Science*, 302(5650), 1514–  
2 1515, doi:10.1126/science.1092704, 2003.
- 3 Cornejo-Castillo, F. M., Cabello, A. M., Salazar, G., Sánchez-Baracaldo, P., Lima-Mendez,  
4 G., Hingamp, P., Alberti, A., Sunagawa, S., Bork, P., Vargas, C. de, Raes, J., Bowler, C.,  
5 Wincker, P., Zehr, J. P., Gasol, J. M., Massana, R. and Acinas, S. G.: Cyanobacterial  
6 symbionts diverged in the late Cretaceous towards lineage-specific nitrogen fixation factories  
7 in single-celled phytoplankton, *Nat. Commun.*, 7, 11071, doi:10.1038/ncomms11071, 2016.
- 8 Deutsch, C., Sarmiento, J. L., Sigman, D. M., Gruber, N. and Dunne, J. P.: Spatial coupling of  
9 nitrogen inputs and losses in the ocean, *Nature*, 445(7124), 163–167,  
10 doi:10.1038/nature05392, 2007.
- 11 Dufour, P., Charpy, L., Bonnet, S. and Garcia, N.: Phytoplankton nutrient control in the  
12 oligotrophic South Pacific subtropical gyre (Tuamotu Archipelago), *Mar. Ecol. Prog. Ser.*,  
13 179, 285–290, doi:10.3354/meps179285, 1999.
- 14 Dupouy, C., Frouin, R., Maillard, M., Tedetti, M., Charriere, B., Roettgers, R., Martias, C.,  
15 Rodier, M., Pujo-Pay, M., Duhamel, S., Guidi, L. and Sempere, R.: Influence of cyanobacteria  
16 on Longitudinal and short-term variations in UV-Vis optical properties in the Western  
17 Tropical South Pacific Ocean. This issue.
- 18 Dyhrman, S. T. and Ruttenberg, K. C.: Presence and regulation of alkaline phosphatase  
19 activity in eukaryotic phytoplankton from the coastal ocean: Implications for dissolved  
20 organic phosphorus remineralization, *Limnol. Oceanogr.*, 51(3), 1381–1390,  
21 doi:10.4319/lo.2006.51.3.1381, 2006.
- 22 Dyhrman, S. T., Chappell, P. D., Haley, S. T., Moffett, J. W., Orchard, E. D., Waterbury, J. B.  
23 and Webb, E. A.: Phosphonate utilization by the globally important marine diazotroph  
24 *Trichodesmium*, *Nature*, 439(7072), 68–71, doi:10.1038/nature04203, 2006.
- 25 Eugster, O. and Gruber, N.: A probabilistic estimate of global marine N-fixation and  
26 denitrification, *Glob. Biogeochem. Cycles*, 26(4), GB4013, doi:10.1029/2012GB004300,  
27 2012.
- 28 Farnelid, H., Turk-Kubo, K., Muñoz-Marín, M. del C. and Zehr, J. P.: New insights into the  
29 ecology of the globally significant uncultured nitrogen-fixing symbiont UCYN-A, *Aquat.*  
30 *Microb. Ecol.*, 77(3), 125–138, doi:10.3354/ame01794, 2016.
- 31 Fernandez, C., Farías, L. and Ulloa, O.: Nitrogen Fixation in Denitrified Marine Waters,  
32 *PLOS ONE*, 6(6), e20539, doi:10.1371/journal.pone.0020539, 2011.
- 33 Fitzsimmons, J. N., Boyle, E. A. and Jenkins, W. J.: Distal transport of dissolved  
34 hydrothermal iron in the deep South Pacific Ocean, *Proc. Natl. Acad. Sci.*, 111(47), 16654–  
35 16661, doi:10.1073/pnas.1418778111, 2014.
- 36 Foster, R. A. and Zehr, J. P.: Characterization of diatom–cyanobacteria symbioses on the  
37 basis of *nifH*, *hetR* and 16S rRNA sequences, *Environ. Microbiol.*, 8(11), 1913–1925,  
38 doi:10.1111/j.1462-2920.2006.01068.x, 2006.
- 39 Foster, R. A., Subramaniam, A., Mahaffey, C., Carpenter, E. J., Capone, D. G. and Zehr, J. P.:  
40 Influence of the Amazon River plume on distributions of free-living and symbiotic

1 cyanobacteria in the western tropical north Atlantic Ocean, *Limnol. Oceanogr.*, 52(2), 517–  
2 532, doi:10.4319/lo.2007.52.2.0517, 2007.

3 Foster, R. A., Subramaniam, A. and Zehr, J. P.: Distribution and activity of diazotrophs in the  
4 Eastern Equatorial Atlantic, *Environ. Microbiol.*, 11(4), 741–750, doi:10.1111/j.1462-  
5 2920.2008.01796.x, 2009.

6 Foster, R. A., Goebel, N. L. and Zehr, J. P.: Isolation of *Calothrix Rhizosoleniae*  
7 (cyanobacteria) Strain Sc01 from *Chaetoceros* (bacillariophyta) Spp. Diatoms of the  
8 Subtropical North Pacific Ocean1, *Journal of Phycology*, 46(5), 1028–1037,  
9 doi:10.1111/j.1529-8817.2010.00885.x, 2010.

10 Garcia, N., Raimbault, P. and Sandroni, V.: Seasonal nitrogen fixation and primary  
11 production in the Southwest Pacific: nanoplankton diazotrophy and transfer of nitrogen to  
12 picoplankton organisms, *Mar. Ecol. Prog. Ser.*, 343, 25–33, doi:10.3354/meps06882, 2007.

13 Goebel, N. L., Turk, K. A., Achilles, K. M., Paerl, R., Hewson, I., Morrison, A. E., Montoya,  
14 J. P., Edwards, C. A. and Zehr, J. P.: Abundance and distribution of major groups of  
15 diazotrophic cyanobacteria and their potential contribution to N<sub>2</sub> fixation in the tropical  
16 Atlantic Ocean, *Environ. Microbiol.*, 12(12), 3272–3289, doi:10.1111/j.1462-  
17 2920.2010.02303.x, 2010.

18 Gourdeau, L., Kessler, W. S., Davis, R. E., Sherman, J., Maes, C. and Kestenare, E.: Zonal  
19 Jets Entering the Coral Sea, *J. Phys. Oceanogr.*, 38(3), 715–725, doi:10.1175/2007JPO3780.1,  
20 2008.

21 Griesse, M., Lange, C. and Soppa, J.: Ploidy in cyanobacteria, *FEMS Microbiol. Lett.*, 323(2),  
22 124–131, doi:10.1111/j.1574-6968.2011.02368.x, 2011.

23 Halm, H., Musat, N., Lam, P., Langlois, R., Musat, F., Peduzzi, S., Lavik, G., Schubert, C. J.,  
24 Singha, B., LaRoche, J. and Kuypers, M. M. M.: Co-occurrence of denitrification and  
25 nitrogen fixation in a meromictic lake, Lake Cadagno (Switzerland), *Environ. Microbiol.*,  
26 11(8), 1945–1958, doi:10.1111/j.1462-2920.2009.01917.x, 2009.

27 Halm, H., Lam, P., Ferdelman, T. G., Lavik, G., Dittmar, T., LaRoche, J., D’Hondt, S. and  
28 Kuypers, M. M.: Heterotrophic organisms dominate nitrogen fixation in the South Pacific  
29 Gyre, *ISME J.*, 6(6), 1238–1249, doi:10.1038/ismej.2011.182, 2012.

30 Hansell, D. A. and Feely, R. A.: Atmospheric Intertropical Convergence impacts surface  
31 ocean carbon and nitrogen biogeochemistry in the western tropical Pacific, *Geophys. Res.*  
32 *Lett.*, 27(7), 1013–1016, doi:10.1029/1999GL002376, 2000.

33 Haselkorn, R.: Heterocysts, *Annu. Rev. Plant Physiol.*, 29(1), 319–344,  
34 doi:10.1146/annurev.pp.29.060178.001535, 1978.

35 Hood, R. R., Coles, V. J. and Capone, D. G.: Modeling the distribution of *Trichodesmium* and  
36 nitrogen fixation in the Atlantic Ocean, *J. Geophys. Res. Oceans*, 109(C6), C06006,  
37 doi:10.1029/2002JC001753, 2004.

38 Howard, J. B. and Rees, D. C.: Structural Basis of Biological Nitrogen Fixation, *Chem. Rev.*,  
39 96(7), 2965–2982, doi:10.1021/cr9500545, 1996.

1 Jacobson, M. R., Brigle, K. E., Bennett, L. T., Setterquist, R. A., Wilson, M. S., Cash, V. L.,  
2 Beynon, J., Newton, W. E. and Dean, D. R.: Physical and genetic map of the major nif gene  
3 cluster from *Azotobacter vinelandii*, *J. Bacteriol.*, 171(2), 1017–1027, 1989.

4 Karl, D., Letelier, R., Tupas, L., Dore, J., Christian, J. and Hebel, D.: The role of nitrogen  
5 fixation in biogeochemical cycling in the subtropical North Pacific Ocean, *Nature*, 388(6642),  
6 533–538, doi:10.1038/41474, 1997.

7 Karl, D. M., Björkman, K. M., Dore, J. E., Fujieki, L., Hebel, D. V., Houlihan, T., Letelier, R.  
8 M. and Tupas, L. M.: Ecological nitrogen-to-phosphorus stoichiometry at station ALOHA,  
9 *Deep Sea Res. Part II Top. Stud. Oceanogr.*, 48(8–9), 1529–1566, doi:10.1016/S0967-  
10 0645(00)00152-1, 2001.

11 Karl, D. M., Church, M. J., Dore, J. E., Letelier, R. M. and Mahaffey, C.: Predictable and  
12 efficient carbon sequestration in the North Pacific Ocean supported by symbiotic nitrogen  
13 fixation, *Proc. Natl. Acad. Sci.*, 109(6), 1842–1849, doi:10.1073/pnas.1120312109, 2012.

14 Kong, L., Jing, H., Kataoka, T., Sun, J. and Liu, H.: Phylogenetic diversity and spatio-  
15 temporal -distribution of nitrogenase genes (nifH) in the northern South China Sea, *Aquat.*  
16 *Microb. Ecol.*, 65(1), 15–27, doi:10.3354/ame01531, 2011.

17 Krupke, A., Musat, N., LaRoche, J., Mohr, W., Fuchs, B. M., Amann, R. I., Kuypers, M. M.  
18 M. and Foster, R. A.: In situ identification and N<sub>2</sub> and C fixation rates of uncultivated  
19 cyanobacteria populations, *Syst. Appl. Microbiol.*, 36(4), 259–271,  
20 doi:10.1016/j.syapm.2013.02.002, 2013.

21 Krupke, A., Lavik, G., Halm, H., Fuchs, B. M., Amann, R. I. and Kuypers, M. M. M.:  
22 Distribution of a consortium between unicellular algae and the N<sub>2</sub> fixing cyanobacterium  
23 UCYN-A in the North Atlantic Ocean, *Environ. Microbiol.*, 16(10), 3153–3167,  
24 doi:10.1111/1462-2920.12431, 2014.

25 Krupke, A., Mohr, W., LaRoche, J., Fuchs, B. M., Amann, R. I. and Kuypers, M. M.: The  
26 effect of nutrients on carbon and nitrogen fixation by the UCYN-A–haptophyte symbiosis,  
27 *ISME J.*, 9(7), 1635–1647, doi:10.1038/ismej.2014.253, 2015.

28 Kustka, A. B., Sañudo-Wilhelmy, S. A., Carpenter, E. J., Capone, D., Burns, J. and Sunda, W.  
29 G.: Iron requirements for dinitrogen- and ammonium-supported growth in cultures of  
30 *Trichodesmium* (IMS 101): Comparison with nitrogen fixation rates and iron: carbon ratios of  
31 field populations, *Limnol. Oceanogr.*, 48(5), 1869–1884, doi:10.4319/lo.2003.48.5.1869,  
32 2003.

33 Landolfi, A., Koeve, W., Dietze, H., Kähler, P. and Oschlies, A.: A new perspective on  
34 environmental controls of marine nitrogen fixation, *Geophys. Res. Lett.*, 42(11),  
35 2015GL063756, doi:10.1002/2015GL063756, 2015.

36 Langlois, R., Mills, M. M., Ridame, C., Croot, P. and LaRoche, J.: Diazotrophic bacteria  
37 respond to Saharan dust additions, *Mar. Ecol. Prog. Ser.*, 470(doi:10.3354/meps10109), 1–14,  
38 doi:Langlois, Rebecca, Mills, M. M., Ridame, Celine, Croot, Peter and LaRoche, Julie  
39 (2012) Diazotrophic bacteria respond to Saharan dust additions *Marine Ecology Progress*  
40 *Series*, 470 . pp. 1-14. DOI 10.3354/meps10109 <<http://dx.doi.org/10.3354/meps10109>>.,  
41 2012.



- 1 Langlois, R. J., LaRoche, J. and Raab, P. A.: Diazotrophic Diversity and Distribution in the  
2 Tropical and Subtropical Atlantic Ocean, *Appl. Environ. Microbiol.*, 71(12), 7910–7919,  
3 doi:10.1128/AEM.71.12.7910-7919.2005, 2005.
- 4 Langlois, R. J., Hümmer, D. and LaRoche, J.: Abundances and Distributions of the Dominant  
5 *nifH* Phylotypes in the Northern Atlantic Ocean, *Appl. Environ. Microbiol.*, 74(6), 1922–1931,  
6 doi:10.1128/AEM.01720-07, 2008.
- 7 Law, C. S., Woodward, E. M. S., Ellwood, M. J., Marriner, A., Bury, S. J. and Safi, K. A.:  
8 Response of surface nutrient inventories and nitrogen fixation to a tropical cyclone in the  
9 southwest Pacific, *Limnol. Oceanogr.*, 56(4), 1372–1385, doi:10.4319/lo.2011.56.4.1372,  
10 2011.
- 11 Löscher, C. R., LaRoche, J. and Schmitz, R. A.: Underestimation of Marine Dinitrogen  
12 Fixation: A Novel Method and Novel Diazotrophic Habitats, in *Biological Nitrogen Fixation*,  
13 edited by F. J. de Bruijn, pp. 891–896, John Wiley & Sons, Inc. [online] Available from:  
14 <http://onlinelibrary.wiley.com/doi/10.1002/9781119053095.ch87/summary> (Accessed 29  
15 November 2016), 2015.
- 16 Luo, Y.-W., Doney, S. C., Anderson, L. A., Benavides, M., Berman-Frank, I., Bode, A.,  
17 Bonnet, S., Boström, K. H., Böttjer, D., Capone, D. G., Carpenter, E. J., Chen, Y. L., Church,  
18 M. J., Dore, J. E., Falcón, L. I., Fernández, A., Foster, R. A., Furuya, K., Gómez, F.,  
19 Gundersen, K., Hynes, A. M., Karl, D. M., Kitajima, S., Langlois, R. J., LaRoche, J., Letelier,  
20 R. M., Marañón, E., McGillicuddy, D. J., Moisander, P. H., Moore, C. M., Mouriño-  
21 Carballido, B., Mulholland, M. R., Needoba, J. A., Orcutt, K. M., Poulton, A. J., Rahav, E.,  
22 Raimbault, P., Rees, A. P., Riemann, L., Shiozaki, T., Subramaniam, A., Tyrrell, T., Turk-  
23 Kubo, K. A., Varela, M., Villareal, T. A., Webb, E. A., White, A. E., Wu, J. and Zehr, J. P.:  
24 Database of diazotrophs in global ocean: abundance, biomass and nitrogen fixation rates,  
25 *Earth Syst. Sci. Data*, 4(1), 47–73, doi:Luo, Y.-W.; Doney, S.C.; Anderson, L.A.; Benavides,  
26 M.; Berman-Frank, I.; Bode, A.; Bonnet, S.; Boström, K.H.; Böttjer, D.; Capone, D.G.;  
27 Carpenter, E.J.; Chen, Y.L.; Church, M.J.; Dore, J.E.; Falcón, L.I.; Fernández, A.; Foster,  
28 R.A.; Furuya, K.; Gómez, F.; Gundersen, K.; Hynes, A.M.; Karl, D.M.; Kitajima, S.; Langlois,  
29 R.J.; LaRoche, J.; Letelier, R.M.; Marañón, E.; McGillicuddy, D.J.; Moisander, P.H.; Moore,  
30 C.M.; Mouriño-Carballido, B.; Mulholland, M.R.; Needoba, J.A.; Orcutt, K.M.; Poulton, A.J.;  
31 Rahav, E.; Raimbault, P.; Rees, A.P.; Riemann, L.; Shiozaki, T.; Subramaniam, A.; Tyrrell,  
32 T.; Turk-Kubo, K.A.; Varela, M.; Villareal, T.A.; Webb, E.A.; White, A.E.; Wu, J.; Zehr, J.P..  
33 2012 Database of diazotrophs in global ocean: abundance, biomass and nitrogen fixation  
34 rates. *Earth System Science Data*, 4 (1). 47-73. 10.5194/essd-4-47-2012  
35 <<http://dx.doi.org/10.5194/essd-4-47-2012>>, 2012.
- 36 Marchesiello, P. and Estrade, P.: Upwelling limitation by onshore geostrophic flow, *J. Mar.*  
37 *Res.*, 68(1), 37–62, doi:10.1357/002224010793079004, 2010.
- 38 Martínez-Pérez, C., Mohr, W., Löscher, C. R., Dekaezemacker, J., Littmann, S., Yilmaz, P.,  
39 Lehnen, N., Fuchs, B. M., Lavik, G., Schmitz, R. A., LaRoche, J. and Kuypers, M. M. M.:  
40 The small unicellular diazotrophic symbiont, UCYN-A, is a key player in the marine nitrogen  
41 cycle, *Nat. Microbiol.*, 1, 16163, doi:10.1038/nmicrobiol.2016.163, 2016.
- 42 Messer, L. F., Doubell, M., Jeffries, T. C., Brown, M. V. and Seymour, J. R.: Prokaryotic and  
43 diazotrophic population dynamics within a large oligotrophic inverse estuary, *Aquat. Microb.*  
44 *Ecol.*, 74(1), 1–15, doi:10.3354/ame01726, 2015.

1 Messer, L. F., Mahaffey, C., Robinson, C. M., Jeffries, T. C., Baker, K. G., Bibiloni Isaksson,  
2 J., Ostrowski, M., Doblin, M. A., Brown, M. V. and Seymour, J. R.: High levels of  
3 heterogeneity in diazotroph diversity and activity within a putative hotspot for marine  
4 nitrogen fixation, *ISME J.*, 10(6), 1499–1513, doi:10.1038/ismej.2015.205, 2016.

5 Meyerhof, O. and Burk, D.: Über die Fixation des Luftstickstoffs durch *Azotobacter*, *Z. Phys.*  
6 *Chem. Abt A*, (139), 117–142, 1928.

7 Mills, M. M., Ridame, C., Davey, M., La Roche, J. and Geider, R. J.: Iron and phosphorus co-  
8 limit nitrogen fixation in the eastern tropical North Atlantic, *Nature*, 429(6989), 292–294,  
9 doi:10.1038/nature02550, 2004.

10 Mitsui, A., Kumazawa, S., Takahashi, A., Ikemoto, H., Cao, S. and Arai, T.: Strategy by  
11 which nitrogen-fixing unicellular cyanobacteria grow photoautotrophically, *Nature*, 323, 720–  
12 722, doi:10.1038/323720a0, 1986.

13 Moisander, P. H., Beinart, R. A., Voss, M. and Zehr, J. P.: Diversity and abundance of  
14 diazotrophic microorganisms in the South China Sea during intermonsoon, *ISME J.*, 2(9),  
15 954–967, doi:10.1038/ismej.2008.51, 2008.

16 Moisander, P. H., Beinart, R. A., Hewson, I., White, A. E., Johnson, K. S., Carlson, C. A.,  
17 Montoya, J. P. and Zehr, J. P.: Unicellular Cyanobacterial Distributions Broaden the Oceanic  
18 N<sub>2</sub> Fixation Domain, *Science*, 327(5972), 1512–1514, doi:10.1126/science.1185468, 2010.

19 Moisander, P. H., Zhang, R., Boyle, E. A., Hewson, I., Montoya, J. P. and Zehr, J. P.:  
20 Analogous nutrient limitations in unicellular diazotrophs and *Prochlorococcus* in the South  
21 Pacific Ocean, *ISME J.*, 6(4), 733–744, doi:10.1038/ismej.2011.152, 2012.

22 Moutin, T., Karl, D. M., Duhamel, S., Rimmelin, P., Raimbault, P., Mooy, V., S. B. A. and  
23 Claustre, H.: Phosphate availability and the ultimate control of new nitrogen input by nitrogen  
24 fixation in the tropical Pacific Ocean, , doi:10.5194/bg-5-95-2008, 2008.

25 Moutin, T., A. Doglioli, A. deVerneil, S. Bonnet.: The Oligotrophy to the UlTra-oligotrophy  
26 PACific Experiment (OUTPACE cruise, Feb. 18 to Apr. 3, 2015). This issue.

27 Mumy, K. L. and Findlay, R. H.: Convenient determination of DNA extraction efficiency  
28 using an external DNA recovery standard and quantitative-competitive PCR, *J. Microbiol.*  
29 *Methods*, 57(2), 259–268, doi:10.1016/j.mimet.2004.01.013, 2004.

30 Needoba, J. A., Foster, R. A., Sakamoto, C., Zehr, J. P. and Johnson, K. S.: Nitrogen fixation  
31 by unicellular diazotrophic cyanobacteria in the temperate oligotrophic North Pacific Ocean,  
32 *Limnol. Oceanogr.*, 52(4), 1317–1327, doi:10.4319/lo.2007.52.4.1317, 2007.

33 Ottesen, E. A., Young, C. R., Eppley, J. M., Ryan, J. P., Chavez, F. P., Scholin, C. A. and  
34 DeLong, E. F.: Pattern and synchrony of gene expression among sympatric marine microbial  
35 populations, *PNAS*, 110(6), E488–E497, doi:10.1073/pnas.1222099110, 2013.

36 Preston, C. M., Harris, A., Ryan, J. P., Roman, B., Iii, R. M., Jensen, S., Everlove, C., Birch,  
37 J., Dzenitis, J. M., Pargett, D., Adachi, M., Turk, K., Zehr, J. P. and Scholin, C. A.:  
38 Underwater Application of Quantitative PCR on an Ocean Mooring, *PLOS ONE*, 6(8),  
39 e22522, doi:10.1371/journal.pone.0022522, 2011.

- 1 Qiu, B., Chen, S. and Kessler, W. S.: Source of the 70-Day Mesoscale Eddy Variability in the  
2 Coral Sea and the North Fiji Basin, *J. Phys. Oceanogr.*, 39(2), 404–420,  
3 doi:10.1175/2008JPO3988.1, 2009.
- 4 Raimbault, P., Garcia, N. and Cerutti, F.: Distribution of inorganic and organic nutrients in the  
5 South Pacific Ocean - evidence for long-term accumulation of organic matter in nitrogen-  
6 depleted waters, *Biogeosciences Discuss.*, 4, 3041–3087, 2007.
- 7 Raven, J. A.: The iron and molybdenum use efficiencies of plant growth with different energy,  
8 carbon and nitrogen sources, *New Phytol.*, 109(3), 279–287, doi:10.1111/j.1469-  
9 8137.1988.tb04196.x, 1988.
- 10 Robidart, J. C., Church, M. J., Ryan, J. P., Ascani, F., Wilson, S. T., Bombar, D., Marin, R.,  
11 Richards, K. J., Karl, D. M., Scholin, C. A. and Zehr, J. P.: Ecogenomic sensor reveals  
12 controls on N<sub>2</sub>-fixing microorganisms in the North Pacific Ocean, *ISME J.*, 8(6), 1175–1185,  
13 doi:10.1038/ismej.2013.244, 2014.
- 14 Sañudo-Wilhelmy, S. A., Kustka, A. B., Gobler, C. J., Hutchins, D. A., Yang, M., Lwiza, K.,  
15 Burns, J., Capone, D. G., Raven, J. A. and Carpenter, E. J.: Phosphorus limitation of nitrogen  
16 fixation by *Trichodesmium* in the central Atlantic Ocean, *Nature*, 411(6833), 66–69,  
17 doi:10.1038/35075041, 2001.
- 18 Sargent, E. C., Hitchcock, A., Johansson, S. A., Langlois, R., Moore, C. M., LaRoche, J.,  
19 Poulton, A. J. and Bibby, T. S.: Evidence for polyploidy in the globally important diazotroph  
20 *Trichodesmium*, *FEMS Microbiol. Lett.*, 363(21), fnw244, doi:10.1093/femsle/fnw244, 2016.
- 21 Shiozaki, T., Kodama, T. and Furuya, K.: Large-scale impact of the island mass effect through  
22 nitrogen fixation in the western South Pacific Ocean, *Geophys. Res. Lett.*, 41(8),  
23 2014GL059835, doi:10.1002/2014GL059835, 2014.
- 24 Short, S. M., Jenkins, B. D. and Zehr, J. P.: Spatial and Temporal Distribution of Two  
25 Diazotrophic Bacteria in the Chesapeake Bay, *Appl. Environ. Microbiol.*, 70(4), 2186–2192,  
26 doi:10.1128/AEM.70.4.2186-2192, 2004.
- 27 Sohm, J. A., Webb, E. A. and Capone, D. G.: Emerging patterns of marine nitrogen fixation.  
28 *Nat. Rev. Microbiol.*, 9(7), 499-508, 2011.
- 29 Stewart, W. D. P.: Biological and Ecological Aspects of Nitrogen Fixation by Free-Living  
30 Micro-Organisms, *Proc. R. Soc. Lond. B Biol. Sci.*, 172(1029), 367–388, 1969.
- 31 Subramaniam, A., Yager, P. L., Carpenter, E. J., Mahaffey, C., Björkman, K., Cooley, S.,  
32 Kustka, A. B., Montoya, J. P., Sañudo-Wilhelmy, S. A., Shipe, R. and Capone, D. G.:  
33 Amazon River enhances diazotrophy and carbon sequestration in the tropical North Atlantic  
34 Ocean, *Proc. Natl. Acad. Sci.*, 105(30), 10460–10465, doi:10.1073/pnas.0710279105, 2008.
- 35 Sukenik, A., Kaplan-Levy, R. N., Welch, J. M. and Post, A. F.: Massive multiplication of  
36 genome and ribosomes in dormant cells (akinetes) of *Aphanizomenon ovalisporum*  
37 (Cyanobacteria), *ISME J.*, 6(3), 670–679, doi:10.1038/ismej.2011.128, 2012.
- 38 Taniuchi, Y., Chen, Y. L., Chen, H.-Y., Tsai, M.-L. and Ohki, K.: Isolation and  
39 characterization of the unicellular diazotrophic cyanobacterium Group C TW3 from the

1 tropical western Pacific Ocean, *Environ. Microbiol.*, 14(3), 641–654, doi:10.1111/j.1462-  
2 2920.2011.02606.x, 2012.

3 Thompson, A., Carter, B. J., Turk-Kubo, K., Malfatti, F., Azam, F. and Zehr, J. P.: Genetic  
4 diversity of the unicellular nitrogen-fixing cyanobacteria UCYN-A and its prymnesiophyte  
5 host, *Environ. Microbiol.*, 16(10), 3238–3249, doi:10.1111/1462-2920.12490, 2014.

6 Thompson, A. W., Foster, R. A., Krupke, A., Carter, B. J., Musat, N., Vaultot, D., Kuypers, M.  
7 M. M. and Zehr, J. P.: Unicellular Cyanobacterium Symbiotic with a Single-Celled  
8 Eukaryotic Alga, *Science*, 337(6101), 1546–1550, doi:10.1126/science.1222700, 2012.

9 Tripp, H. J., Bench, S. R., Turk, K. A., Foster, R. A., Desany, B. A., Niazi, F., Affourtit, J. P.  
10 and Zehr, J. P.: Metabolic streamlining in an open-ocean nitrogen-fixing cyanobacterium,  
11 *Nature*, 464(7285), 90–94, doi:10.1038/nature08786, 2010.

12 Turk-Kubo, K. A., Farnelid, H. M., Shilova, I. N., Henke, B. and Zehr, J. P.: Distinct  
13 ecological niches of marine symbiotic N<sub>2</sub>-fixing cyanobacterium *Candidatus*  
14 *Atelocyanobacterium thalassa* sublineages. *J. Phycol.*, 53(2), 451–461, 2017.

15 Turk-Kubo, K. A., Frank, I. E., Hogan, M. E., Desnues, A., Bonnet, S. and Zehr, J. P.:  
16 Diazotroph community succession during the VAHINE mesocosm experiment (New  
17 Caledonia lagoon), *Biogeosciences*, 12(24), 7435–7452, doi:10.5194/bg-12-7435-2015, 2015.

18 Van Den Broeck, N., Moutin, T., Rodier, M. and Bouteiller, A. L.: Seasonal variations of  
19 phosphate availability in the SW Pacific Ocean near New Caledonia, *Mar. Ecol. Prog. Ser.*,  
20 268, 1–12, doi:10.3354/meps268001, 2004.

21 Wallace, B. C., Lajeunesse, M. J., Dietz, G., Dahabreh, I.J., Trikalinos, T.A., Schmid, C.H.  
22 and Gurevitch, J.: OpenMEE: Intuitive, open-source software for meta analysis in ecology  
23 and evolutionary biology. *Methods Ecol. Evol.*, 2016.

24 Webb, E. A., Ehrenreich, I. M., Brown, S. L., Valois, F. W. and Waterbury, J. B.: Phenotypic  
25 and genotypic characterization of multiple strains of the diazotrophic cyanobacterium,  
26 *Crocospaera watsonii*, isolated from the open ocean, *Environ. Microbiol.*, 11(2), 338–348,  
27 doi:10.1111/j.1462-2920.2008.01771.x, 2009.

28 Wells, M. L., Vallis, G. K. and Silver, E. A.: Tectonic processes in Papua New Guinea and  
29 past productivity in the eastern equatorial Pacific Ocean, *Nature*, 398(6728), 601–604,  
30 doi:10.1038/19281, 1999.

31 Yoshikawa, C., Nakatsuka, T. and Kawahata, H.: Transition of low-salinity water in the  
32 Western Pacific Warm Pool recorded in the nitrogen isotopic ratios of settling particles,  
33 *Geophys. Res. Lett.*, 32(14), L14615, doi:10.1029/2005GL023103, 2005.

34 Young, J. P. W.: The Phylogeny and Evolution of Nitrogenases, in *Genomes and Genomics of*  
35 *Nitrogen-fixing Organisms*, edited by R. Palacios and W. E. Newton, pp. 221–241, Springer  
36 Netherlands. [online] Available from: [http://link.springer.com/chapter/10.1007/1-4020-3054-](http://link.springer.com/chapter/10.1007/1-4020-3054-1_14)  
37 [1\\_14](http://link.springer.com/chapter/10.1007/1-4020-3054-1_14) (Accessed 29 November 2016), 2005.

38 Zehr, J. P., Waterbury, J. B., Turner, P. J., Montoya, J. P., Omoregie, E., Steward, G. F.,  
39 Hansen, A. and Karl, D. M.: Unicellular cyanobacteria fix N<sub>2</sub> in the subtropical North Pacific  
40 Ocean, *Nature*, 412(6847), 635–638, doi:10.1038/35088063, 2001.

- 1 Zehr, J. P., Methe, B. and Foster, R.: New Nitrogen-Fixing Microorganisms from the Oceans:  
2 Biological Aspects and Global Implications, in Biological Nitrogen Fixation, Sustainable  
3 Agriculture and the Environment, pp. 361–365, Springer Netherlands. [online] Available  
4 from: [http://link.springer.com/chapter/10.1007/1-4020-3570-5\\_87](http://link.springer.com/chapter/10.1007/1-4020-3570-5_87) (Accessed 29 November  
5 2016), 2005.
- 6 Zehr, J. P., Bench, S. R., Carter, B. J., Hewson, I., Niazi, F., Shi, T., Tripp, H. J. and Affourtit,  
7 J. P.: Globally Distributed Uncultivated Oceanic N<sub>2</sub>-Fixing Cyanobacteria Lack Oxygenic  
8 Photosystem II, *Science*, 322(5904), 1110–1112, doi:10.1126/science.1165340, 2008.
- 9

1 Table 01. Summary of environmental conditions in the surface along the cruise transect.

| Region                                                                | Stations             | surface*<br>DIN‡<br>μM | surface*<br>DIP<br>μM | surface*<br>DiSi<br>μM | surface*<br>salinity<br>(PSU) | surface*<br>temp. °C |
|-----------------------------------------------------------------------|----------------------|------------------------|-----------------------|------------------------|-------------------------------|----------------------|
| Melanesian<br>archipelago<br>(MA)<br>160° E-178° E<br>170 °W - 175 °W | SD1-12<br>LDA<br>LDB | 0.02 ±<br>0.01         | 0.03 ±<br>0.02        | 0.55 ±<br>0.10         | 35.13 ±<br>0.27               | 29.33 ±<br>0.45      |
| Subtropical gyre<br>(SG)<br>160 °W- 169°W                             | SD13-<br>15<br>LDC   | 0.01 ±<br>0.01         | 0.18 ±<br>0.07        | 0.79 ±<br>0.04         | 35.12 ±<br>0.10               | 29.34 ±<br>0.18      |

2 \*5m depth, ‡NO<sub>2</sub>+NO

**Figure 1.** Sampling locations and the horizontal and vertical distributions of diazotrophs and the UCYN-A1 and UCYN-A-2 hosts in the study area. Sampling depths are indicated as black dots (white for LD stations) and the abundances are the log *nifH* gene copy L<sup>-1</sup> for the diazotrophs and 18S rRNA gene copies L<sup>-1</sup> for the UCYN-A host lineages. The boundary between the Melanesian archipelago and subtropical gyre in the transect map is marked with a dotted line.

**Figure 2 a-b.** LOG10 transformed mean abundances for the 4 most abundant diazotrophs across the transect: het-1 (blue), *Trichodesmium* (green), UCYN-A (yellow) and UCYN-B (red). The mean *nifH* abundance values (log *nifH* copies L<sup>-1</sup>) shown as a function of (a) percent (%) surface irradiance, depth (m) on the secondary y axis and (b) at each station. The solid black line in (b) indicates the transition between the Melanesian archipelago (MA) and the subtropical gyre (SG).

**Figure 3.** Hierarchical clustering heat map of Spearman's Rho results. The histogram shows negative (blue) and positive (green) values of correlation strength between parameters. Stars within cells mark significant correlations (p<0.05). In brackets are the two distinct groups in the WTSP.

**Figure 4 a-b.** Multivariate RDA biplot (a), which also depicts variance of included parameters (b). As can be seen, a majority of the variance in the dataset is explained by the RDA1 and RDA2 axes meaning that most of the variance observed is explained by the included environmental parameters. The arrows are the constrained explanatory vectors with the dots representing the superimposed unconstrained response variables. PAR and nutrients (DIP and DIN) were omitted due to limited data.

**Figure 5 a-d.** Meta-analysis bar graphs, a) *Trichodesmium*, b) UCYN-B, c) UCYN-A, d) het-1, with the significant (p<0.05) parameters for each diazotroph arranged as the strongest effect

- 1 to the left and weakest to the right (either positive or negative). Each parameter is color coded,
- 2 where the cyanobacterial diazotrophs have been assigned a spectrum of orange from
- 3 *Trichodesmium* (darkest) to het-2 (lightest). Red=temperature, blue=salinity, black=depth,
- 4 green=chlorophyll *a*, yellow=DIN and purple=DIP.
