# Supplementary material for: Distribution and drivers of symbiotic and free-living diazotrophic cyanobacteria in the Western Tropical South Pacific
Source: Copernicus journal article supplement (doi:10.5194/bg-2017-63), 2017-03-10
Supplement: Supplementary file [file Revised manuscript 2.pdf › Revised manuscript 2.pdf]

1 **Distribution and drivers of symbiotic and free-living**  
2 **diazotrophic cyanobacteria in the Western Tropical South**  
3 **Pacific**

4 Marcus Stenegren<sup>1</sup>, Andrea Caputo<sup>1</sup>, Carlo Berg<sup>2</sup>, Sophie Bonnet<sup>3,4</sup>, Rachel A Foster<sup>1</sup>

5 <sup>1</sup> Stockholm University, Department of Ecology, Environment and Plant Sciences. Stockholm, Sweden

6 <sup>2</sup> Science for Life Laboratory/Department of Biology and Environmental Science, Linnaeus University, Kalmar,  
7 Sweden

8 <sup>3</sup> Aix Marseille Université, Centre National de la Recherche Scientifique. Marseille/Noumea, New Caledonia,  
9 France

10 <sup>4</sup> Mediterranean Institute of Oceanography, Institut de Recherche pour le Développement. Marseille, France

11 *Correspondence to:* Marcus Stenegren (marcus.stenegren@su.se)

## 1 Abstract

2 The abundance and distribution of cyanobacterial diazotrophs were quantified in two regions  
3 (Melanesian archipelago, MA and subtropical gyre, SG) of the Western Tropical South  
4 Pacific using *nifH* qPCR assays. UCYN-A1 and A2 host populations were quantified using  
5 18S rRNA qPCR assays including one newly developed assay. All phylotypes were detected  
6 in the upper photic zone (0-50 m), with higher abundances in the MA region. *Trichodesmium*  
7 and UCYN-B dominated, ~~and~~ ranged  $2.18 \times 10^2$ – $9.41 \times 10^6$  and  $1.10 \times 10^2$ – $2.78 \times 10^6$  *nifH*  
8 copies L<sup>-1</sup>, respectively. Het-1 (symbiont of *Rhizosolenia* diatoms) was the next most  
9 abundant ( $1.40 \times 10^1$ – $1.74 \times 10^5$  *nifH* copies L<sup>-1</sup>), and co-occurred with het-2 and het-3.  
10 UCYN-A1 and A2 were the least abundant diazotrophs and were below detection (bd) in 63  
11 and 79, respectively, of 120 samples. ~~In addition, in up to 39% of samples where~~ UCYN-A1  
12 and A2 were detected, their respective hosts were bd. Pairwise comparisons of the *nifH*  
13 abundances and various environmental parameters supported two groups: ~~a~~ deep-dwelling  
14 ~~group~~ (45 m) comprised of UCYN-A1 and A2 and ~~a~~ surface group (0-15m) comprised of  
15 *Trichodesmium*, het-1 and het-2. Temperature and PAR were positively correlated with the  
16 surface group; while UCYN-A1 and A2 were positively correlated with depth, salinity and  
17 oxygen. ~~Similarly, in a~~ meta-analysis of 11 external datasets, ~~all diazotrophs, except UCYN-A~~  
18 ~~were correlated with temperature.~~ Combined, our results indicate that conditions favoring the  
19 UCYN-A symbiosis differ from those of diatom diazotroph associations and free-living  
20 cyanobacterial diazotrophs.

**Deleted:** detected *nifH* copies of the two

**Deleted:** Similar results were identified in aA

**Deleted:** determined temperature and depth were most commonly correlated with diazotrophs abundance

**Deleted:** . , where temperature and depth had a major impact on the diazotrophs in the ocean basins investigated.

## 1 Introduction

Biological di-nitrogen (N<sub>2</sub>) fixation is considered a major source of new nitrogen (N) to oceanic ecosystems (Karl et al., 1997). N<sub>2</sub> fixation is an energetically expensive process, where N<sub>2</sub> gas is reduced to bioavailable ammonia (Howard and Rees, 1996) and is performed by a small but diverse group of bacteria and archaea. The nitrogenase enzyme, which is encoded by a suite of *nif*-genes, mediates N<sub>2</sub> fixation (Jacobson et al., 1989; Young, 2005). Nitrogenase has a high iron (Fe) requirement (Howard and Rees, 1996), and often N<sub>2</sub> fixers, or diazotrophs, are Fe- limited (Kustka et al., 2003; Raven, 1988). Nitrogenase is also sensitive to oxygen (O<sub>2</sub>), which has been shown to negatively influence N<sub>2</sub> fixation efficiency (Meyerhof and Burk, 1928; Stewart, 1969). Thus, autotrophic diazotrophs (e.g. cyanobacteria) have evolved strategies, such as temporal and spatial separation of the fixation process, to protect their nitrogenase from O<sub>2</sub> evolution during photosynthesis (Berman-Frank et al., 2001; Haselkorn, 1978; Mitsui et al., 1986). N<sub>2</sub> fixation is widespread and occurs in marine, limnic and terrestrial habitats. In marine ecosystems it mainly occurs in the photic zone, closest to the surface; however, more recently, evidence has shown activity in deeper depths below the photic zone, including oxygen minimum zones (Benavides et al., 2016; Bonnet et al., 2013; Fernandez et al., 2011; Halm et al., 2009; Löscher et al., 2015).

N<sub>2</sub> fixation in the photic zone is often attributed to a diverse group of cyanobacteria. Traditionally, marine, photic-zone dwelling diazotrophs are divided into two groups based on cell diameter, e.g. > 10 µm and < 10 µm size fractions. Diatom diazotroph associations (DDAs), symbioses between heterocystous cyanobacteria and a variety of diatom genera, and large filamentous non-heterocystous *Trichodesmium* spp., compose the larger size fraction (>10 µm). *Trichodesmium* spp. occurs as free filaments or often in two morphologies of colonies: tufts/rafts and puffs. There are three defined lineages of symbionts of DDAs based on their *nifH* phylogeny: het-1 and het-2 refers to the two the *Richelia intracellularis* lineages

which associate with diatom genera, *Rhizosolenia* and *Hemiaulus*, respectively, while the third lineage, het-3, associates with the heterocystous *Calothrix rhizosoleniae* and *Chaetoceros compressus* diatoms (Foster et al., 2010; Foster and Zehr, 2006).

The unicellular diazotrophic cyanobacterial groups are divided into: UCYN-A, UCYN-B, and UCYN-C groups and are representatives of the <10 µm size fraction. The UCYN-A (*Candidatus Atelocyanobacterium thalassa*) group can be further delineated into 6 sublineages (Thompson et al., 2014; Turk-Kubo et al., 2017), two (UCYN-A1, UCYN-A2) are identified as symbiotic with small prymnesiophyte microalgae (reviewed by Farnelid et al., 2016, see references within). The UCYN-B group has its closest cultured relative as *Crocospaera watsonii* and lives freely, colonially, and also in symbiosis with the diatom *Climacodium frauenfeldianum* (Bench et al., 2013; Carpenter and Janson, 2000; Webb et al., 2009; Zehr et al., 2001). Often overlooked, is the observation that UCYN-B, when colonial or symbiotic could also be associated with the > 10µm size fraction. Less is known about the UCYN-C group, and given that its *nifH* nucleotide sequence is 90% similar (Foster et al., 2007) to *Cyanothece* spp. ATCC51142, it is assumed to be analogous, and thus co-occur with the other < 10 µm size fraction. A diverse group of free-living heterotrophic bacteria (e.g. gamma proteobacteria) (Berthelot et al., 2015; Bombar et al., 2016; Halm et al., 2012; Langlois et al., 2005) and archaea (Zehr et al., 2005) are also within the < 10 µm size fraction.

The distribution and activity of diazotrophs in open ocean ecosystems are governed by different ambient environmental factors, including macronutrient availability (Moutin et al., 2008; Sañudo-Wilhelmy et al., 2001) and temperature (Messer et al., 2016; Moisander et al., 2010). There are also simultaneous influences by several factors (i.e. co-limitation of nutrients, Mills et al., 2004). Moreover, most oceanic models of N<sub>2</sub> fixation assume that all diazotrophs are equally controlled by the same environmental parameters (Deutsch et al., 2007; Hood et al., 2004; Landolfi et al., 2015), despite well recognized differences in genetic

1   repertoires for assimilating dissolved nutrient pools (e.g. dissolved organic phosphate,  
2   Dyhrman et al., 2006; Dyhrman and Ruttenberg, 2006), life histories (free, symbiotic,  
3   colonial), and cell sizes ( $\mu\text{m}$  to  $\text{mm}$ ). A better understanding of these differences would  
4   benefit oceanic models of  $\text{N}_2$  fixation, our understanding of marine  $\text{N}_2$  budgets and the impact  
5   of  $\text{N}_2$  fixation in oceanic surface waters and their communities.

6       The Tropical South Pacific Ocean (TSP) is considered one of the most oligotrophic  
7   regions in the World's oceans (Claustre and Maritorena, 2003) with a widespread N  
8   deficiency (Deutsch et al., 2007; Raimbault et al., 2007) and the central SP gyre has some of  
9   the lowest reported concentrations of dissolved Fe (Blain et al., 2008). One exception is the  
10   Western Tropical South Pacific (WTSP), which harbors many islands with Fe rich sediments  
11   adding to an island mass effect (Shiozaki et al., 2014) and is influenced by multiple ocean  
12   currents, both surface and subsurface, that drive the distribution of dissolved nutrients,  
13   micronutrients, and the biota (Fitzsimmons et al., 2014; Gourdeau et al., 2008; Marchesiello  
14   and Estrade, 2010; Wells et al., 1999). The structure of these currents also promotes shearing  
15   instabilities and strong eddies (Qiu et al., 2009). Moreover, Van Den Broeck et al. (2004)  
16   suggested that the WTSP is phosphate limited, while Law et al. (2011) hypothesized that  
17   primary production and  $\text{N}_2$  fixation in the WTSP follows the seasonality of cyclones, which in  
18   their wake, enrich surface waters with phosphate, and fuel primary and new production. An  
19   earlier investigation along a transect in the western equatorial Pacific estimated that 74% of  
20   the total  $\text{N}_2$  fixation could be attributed to the  $<10 \mu\text{m}$  size fraction although abundances of  
21   unicellular cyanobacteria were moderate ( $17 \text{ cells mL}^{-1}$ ) (Bonnet et al., 2009). However,  
22   diazotroph quantification is lacking further South in tropical waters, despite being recently  
23   recognized as a hot spot of  $\text{N}_2$  fixation, with average rates of  $\sim 570 \mu\text{mol N m}^{-2} \text{ d}^{-1}$  (Bonnet et  
24   al., this issue), i.e. in the upper range ( $100\text{-}1000 \mu\text{mol N m}^{-2} \text{ d}^{-1}$ ) of rates gathered in the  
25   global  $\text{N}_2$  fixation MAREDAT database (Luo et al., 2012).

The primary aim of this study was to quantify diazotroph abundance and distribution in the WTSP, with an emphasis on symbiotic N<sub>2</sub>-fixing populations, both by 'at sea' and lab based quantitative approaches. Since earlier expeditions to the SW Pacific identified it as a potential 'hotspot' for diazotrophy (Bonnet et al., 2015; 2016; 2017; Moisander et al., 2010), the 'at sea' qPCR was performed in order to make informed decisions about the presence, absence, and relative abundance of diazotrophs so that stations could be selected for other assays and characterization of the hydrographic conditions (e.g. incubation experiments, sediment and drifter deployments (see Bonnet et al. this issue). For a more comprehensive investigation of the symbiotic diazotrophs we developed a new primer and probe set for quantification of the UCYN-A1 host. We also identified key environmental parameters, both biotic and abiotic, which influenced the distribution of diazotrophs in the WTSP and tested the congruency of these parameters in an additional 11 publicly available datasets. We hypothesized that the distribution and the environmental drivers of the diazotrophic symbioses should differ due to the major differences in host taxonomy (e.g. diatom vs. prymnesiophyte), size (1-2 µm to 100's µm), and life history (free vs. symbiotic; chain forming). For comparison and for similarly divergent characteristics (symbiotic vs. free; colonial vs. single), several free-living (UCYN-B, *Trichodesmium* spp. and UCYN-C) cyanobacterial diazotrophs were also included.

## 2 Materials and Methods

### 2.1 Sampling

Sampling was conducted on a transect in the WTSP during austral summer (19 Feb-5 Apr, 2015), on board the R/V *L'Atalante* (Fig. 1a). The cruise transect and stations were selected according to the following: regions with low advection to better estimate biogeochemical budgets, contrasting diazotrophic community (e.g. *Trichodesmium* spp. dominated vs. UCYN dominated), and along a trophic and N<sub>2</sub> fixation gradient from west to east (Moutin et al., this

**Deleted:** Nucleic acid samples were taken from 18 stations: three long duration (LD A, B and C) stations (approximately eight days duration) and 15 short duration (SD 1-15) stations (approximately eight hours duration).

1 issue). The cruise is divided into two geographic regions: Melanesian archipelago (MA; SD 1-  
 2 12, LD A and LD B stations, 160° E-178° E and 170°-175° W) and the subtropical gyre (SG;  
 3 SD 13-15 and LD C stations, 160° W-169° W). Long duration stations (LD) of 8 days were  
 4 chosen based on hydrographic conditions, satellite imagery, microscopic analyses of >10 µm  
 5 cyanobacterial diazotrophs and the results of our 'at sea' qPCR analyses of four unicellular  
 6 diazotrophic targets (UCYN-A1, UCYN-A2, UCYN-B and UCYN-C) (see below and Moutin  
 7 et al., this issue).

### 8 **2.1.1 Nucleic acids**

9 Seawater (2.5 L) was collected from 18 stations (LD A-C; SD 1-15) into clean (10% bleach  
 10 rinsed) 2.75 L polycarbonate bottles from 6-7 discrete depths based on surface incident light  
 11 intensity (100, 75, 54, 36, 10, 1, and 0.1%) once per station at both short duration (SD) and  
 12 LD stations using Niskin bottles (12 L) arranged on a Conductivity Temperature Depth (CTD;  
 13 Seabird 911) rosette.

14 After collection from the CTD rosette, 2.5L seawater was immediately filtered onto a  
 15 0.2 µm pore size Supor filter (Pall Corporation, Pall Norden AB, Lund, Sweden) held within a  
 16 25 mm diameter swinnex filter holder (Merck Millipore, Solna, Sweden) using a peristaltic  
 17 pump (Cole-Parmer, Masterflex, Easy-load II, USA). In case the filters clogged with too  
 18 much material, the remaining volume was measured and noted for later calculations. The  
 19 filters were placed in pre-sterilized bead beater tubes (Biospec Bartlesville, OK, USA)  
 20 containing 30 µL of 0.1 mm and 0.5 mm glass bead mixture, flash frozen in liquid nitrogen  
 21 and archived at -80 °C. Four additional DNA samples were collected from 4 discrete depths,  
 22 (75, 50, 36, 10 % light), at 11 of the 18 stations, for the 'at sea' qPCR (see below) and filtered  
 23 as described above. The 'at sea' samples were extracted and processed for qPCR immediately  
 24 after collection (see below).

### 25 **2.1.2 Cell abundances and microscopy observations**

**Deleted:** transect was divided

**Deleted:** (Fig. 1a). The first region (

**Deleted:** ,

**Deleted:** ) included

**Deleted:** (

**Deleted:** . The second region (

**Deleted:** ,

**Deleted:** ) included

**Deleted:** (

**Deleted:** D

1 At the LD stations, 5 L of seawater was collected at the same depths in parallel with the  
2 nucleic acid samples from the CTD-rosette. Two sets of samples, one set each day, were taken  
3 on day 1 and 3 at each LD station and immediately filtered onto a 47 mm diameter Poretics  
4 (millipore) membrane filter with a pore size of 5  $\mu\text{m}$  using a peristaltic pump.

5 At the SD stations, the same collection was implemented, however a 25 mm diameter  
6 Poretics membrane filter was used. The high densities of cells on the latter made it impossible  
7 to properly enumerate the various cyanobacterial diazotrophs and as such these samples were  
8 used only for qualitative observations (see below). Immediately after filtration, samples were  
9 fixed in 1 % paraformaldehyde (v/v) for 30 min prior to storing at -20 °C. For enumeration,  
10 the filter was mounted on a glass slide and examined under an Olympus BX60 microscope  
11 equipped with a filter for blue (460-490 nm) and green (545-580 nm) excitation wavelengths.  
12 Three areas (area = 0.94 mm<sup>2</sup>) per filter were counted separately and values were averaged.  
13 When abundances were low, the entire filter (area = 1734 mm<sup>2</sup>) was observed and cells  
14 enumerated. Due to weak fluorescence, only *Trichodesmium* colonies and free-filaments  
15 could be accurately estimated by microscopy and in addition, the larger cell diameter  
16 *Trichodesmium*, hereafter referred to as *Katagynemene pelagicum*, was enumerated separately  
17 as these were often present albeit at lower cell densities. Other cyanobacterial diazotrophs,  
18 e.g. *C. watsonii*-like, *C. rhizosoleniae* (het-3), and *R. intracellularis* (het-1, het-2) were also  
19 present on the larger 47 mm diameter samples, however fluorescence was weak and therefore  
20 difficult to enumerate. Pico-eukaryote populations, identified as round 1-3  $\mu\text{m}$  diameter cells,  
21 with red excitation under the blue filter set, were also observed. For the latter populations,  
22 qualitative observations of presence and some details on cell integrity (e.g. fluorescence,  
23 diatom frustule, free-living or symbiotic form) are included.



## 2.2 Nutrient analyses

Seawater for nutrient analyses was collected from each station using the CTD rosette at the same depths as those collected for the nucleic acids. Seawater for inorganic nutrient analysis were collected in 20 mL high-density polyethylene HCL-rinsed bottles and poisoned with  $\text{HgCl}_2$  to a final concentration of  $20 \mu\text{g L}^{-1}$  and stored at  $4^\circ\text{C}$  until analysis. The samples were frozen and returned to the laboratory for analysis within 4 months. Dissolved nitrate and nitrite ( $\text{NO}_3^- + \text{NO}_2^-$ , DIN), phosphate ( $\text{PO}_4^{3-}$ , DIP) and silicate ( $\text{Si (OH)}_4$ , DiSi) concentrations were determined by standard colorimetric techniques using a segmented flow analyzer according to Aminot and K  rouel (2007) on a SEAL Analytical AA3 HR system (SEAL Analytica, Serblabo Technologies, Entraigues Sur La Sorgue, France). Quantification limits for nitrate, phosphate and silicate were all  $0.05 \mu\text{mol L}^{-1}$ .

## 2.3 DNA extraction

The DNA from the 120 archived samples was extracted as described in Moisander et al. (2008), with a 30 second reduction in the agitation step in a Fast Prep cell disrupter (Thermo, Model FP120; Qbiogene, Inc. Cedex, France) and an elution volume of  $70 \mu\text{L}$ . The nucleic acid samples collected for the ‘at sea’ qPCR were extracted immediately after filtration using a modified version of the DNeasy plant kit (Qiagen) total DNA extraction protocol. The modifications were an initial 2-minute agitation step using a bead beater (Biospec MiniBeadBeater-16, Model 607EUR; Biospec), 10 min proteinase K incubation and final elution volume was  $25 \mu\text{L}$ .

## 2.4 Oligonucleotide design

A new primer and probe set was designed to amplify the UCYN-A1 host and was based on a published 18S rRNA sequence (accession number JX291893) reported from N. Pacific gyre (station ALOHA) (Thompson et al., 2012). The design utilized the same 96 bp target region of the 18S rRNA used to amplify UCYN-A2 hosts described in Thompson et al. 2014 (Suppl.

Table 1). The primers and probe for the UCYN-A1 host 18S rRNA gene assay are as follows:  
Forward, 5' AGGTTTGCCGGTCTGCCGAT-3'; Reverse, 5'  
GAGCGGGTGTCTGGAGACGGAT-3'; Probe, 5'-FAM-CTGGTAGAACTGTCCT-  
TAMRA-3'. The forward, reverse and probe contain 2-4, 1, and 5 mismatches, respectively,  
to UCYN-A2 host sequences (accession number KF771248-KF771254) and the following  
closely related sequences (98-100%): uncultured eukaryote clones (station ALHOA:  
EU50069; Cariaco Basin: GU824119) *Chrysochromulina parkeae*: AM490994),  
*Braarudospaera bigelowii* TP056a: AB250784 *B. bigelowii* Furue-15: AB478413; *B.*  
*bigelowii* Funahama T3: AB478413; *B. bigelowii* Yastushiro-1 AB478414. The UCYN-A1  
oligonucleotides specificity was tested *de nova* against the following closely related sequences  
derived from uncultured eukaryotic clonal sequences (accession numbers: EU500067-68;  
FJ537341; EU500138-39; EF695227; EU500141; EU499958; EF695229; EF695220). Only  
one mismatch was found in the forward probe for one sequence (EU500138) (Suppl. Table 1).  
The nucleotide sequence identity for UCYN-A1 and UCYN-A2 host sequences is 97.95%.  
Finally, a cross reactivity test between the newly designed UCYN-A1 host oligonucleotides  
and a dilution series of the UCYN-A2 host template was run (see below).

## 2.5 Quantitative PCR

Abundances of *nifH* gene copies from selected diazotrophic groups (UCYN-A1, UCYN-A2,  
UCYN-B, UCYN-C, het-1, het-2, het-3 and *Trichodesmium* spp.) and the 18S rRNA of  
UCYN-A1 and A2 hosts were quantified using previously published oligonucleotides and  
TaqMAN assays (Church et al., 2005; Foster et al., 2007; Moisander et al., 2010; Thompson  
et al., 2014) and the newly designed UCYN-A1 host oligonucleotides (Suppl. Table 1). The  
qPCRs were conducted in a StepOnePlus system (Applied Biosystems, Life Technologies,  
Stockholm Sweden) in fast (>40 min) mode with the following parameters: 95 °C for 20 s,  
followed by 45 cycles of 95 °C for 1 s and 60 °C for 20 s.

1 Cross reactivity tests were run on two of the heterocystous symbiont (het-1 and het-2)  
2 oligonucleotides, the UCYN-A1 and UCYN-A2 oligonucleotides, and the newly designed  
3 UCYN-A1 host oligonucleotides and UCYN-A2 host primer and probe set. Cross reactivity  
4 tests for het-3 were omitted as previously published tests (Foster et al., 2007) showed no  
5 cross-reaction with het-1 or het-2. The standard curve for a particular target was run in  
6 reactions with the other primers and probe sets. For example, the UCYN-A1 TaqMAN host  
7 primers and probes were run in reactions with UCYN-A2 template DNA. The cross reactivity  
8 for the het-1 and het-2 primer and probe sets has been previously reported (Foster et al. 2007),  
9 however only when the assay is run in standard mode. Standard mode runs the holding,  
10 denaturation and annealing stages at the following longer intervals than in Fast mode: 11 min  
11 and 40 s, 14 s, and 40 s, respectively. Hence, we tested the cross-reactivity for the het primers  
12 and probes when run in fast mode, as the fast mode was used in our study. Similarly, the  
13 cross-reactivity between UCYN-A1 and UCYN-A2 were tested in fast mode at two annealing  
14 temperatures 60 °C and 64 °C; 64 °C is the recommended annealing temperature for the  
15 UCYN-A2 assay (Thompson et al. 2014).

16 Reaction volume was 20 µL in all qPCRs and consisted of 10 µL of 2X TaqMan fast buffer  
17 (Applied Biosystems), 5.5 µL of nuclease free water (Sigma Aldrich Sweden AB, Stockholm  
18 Sweden), 1 µL each of the forward and reverse primers (10 µM), 0.5 µL of fluorogenic probe  
19 (10 µM) and 2 µL of DNA extract. For standard mode runs, the latter master mix was  
20 identical with the exception of replacing the fast 2X buffer with the standard 2X buffer. For  
21 reactions quantifying *Trichodesmium* spp. *nifH* copies, SD 9 was excluded and 1 µL of DNA  
22 template was used for the remaining stations due to low template volume, and total reaction  
23 volume was adjusted by addition of 1 µL of nuclease free water. Reactions were performed in  
24 duplicates for the 'at sea' qPCR and in triplicates for the archived samples and lab based  
25 qPCR. For the 'at sea' qPCR, only four targets (UCYN-A1, UCYN-A2, UCYN-B, and

1 UCYN-C) were quantified and only at the SD stations. No assays were processed at SD 5-6,  
2 10-12, and 14 for the 'at sea' qPCR due to no potential LD station selection for these sites.  
3 Two µL of nuclease free water was used as template in no template controls (NTCs); no *nifH*  
4 copies were detected in the NTCs.

5 Gene copy abundance was calculated from the mean Ct value of the 3 replicates and the  
6 standard curve for the appropriate oligonucleotides in the lab based qPCRs. For the 'at sea'  
7 qPCR, a mean Ct value of 2 replicates was used to maximize the number of samples run on  
8 one amplification plate (96 well). In samples where 1 or 2 out of 3 replicates produced an  
9 amplification, signals were noted as detectable, but not quantifiable (dnq) and no  
10 amplification was noted as below detection (bd).

## 11 **2.6 Standard curves and PCR efficiency**

12 Standard curves were plotted and analyzed in Excel for each target based on the qPCR cycle  
13 threshold (Ct) values from known dilutions of synthesized target gene fragments (gBlocks®;  
14 Integrated DNA Technologies, Leuven Belgium) (359 bp *nifH* and 733 bp 18S rRNA for  
15 UCYN-A hosts). Tenfold dilutions were made starting with  $10^8$  to  $10^1$  gene copies L<sup>-1</sup>. The  
16 PCR efficiency, for identification of possible interfering contaminants in our samples, was  
17 determined as previously described (Short et al., 2004) for 12 samples run on the het-1, het-2,  
18 and het-3 primers and probe tests. The qPCR efficiency ranged from 90-99 % with an average  
19 of 94 % efficiency for the diazotroph targets het-1, het-2 and het-3.

## 20 **2.7 Statistics and data analysis**

21 Skewness and normal distribution tests by descriptive statistics was performed in IBM SPSS  
22 (ver. 23) on the following parameters recorded during sample collection in the WTSP from  
23 the CTD package: depth (m), oxygen (ml L<sup>-1</sup>), temperature (°C), chlorophyll fluorescence (µg  
24 L<sup>-1</sup>), photosynthetically active radiation (PAR; µmol photons m<sup>-2</sup> s<sup>-1</sup>), salinity (PSU), and gene

1 copy abundances determined by qPCR. Since fewer samples and targets were processed in the  
2 'at sea' qPCR, only the lab based qPCR results from the archived samples was used for  
3 statistical analysis. Significant skew was noted when skewness, divided by its standard  
4 deviation, exceeded 1.95. All but three targets (het-1, UCYN-B and *Trichodesmium* spp.) and  
5 three environmental parameters (temperature, salinity and oxygen) were significantly skewed  
6 (not normally distributed) even after LOG10 transformation. Therefore a non-parametric  
7 Spearman's rank correlation was conducted to test possible correlations between the targets  
8 and environmental parameters, where we assume that the het groups and UCYN-A clade is  
9 symbiotic, while UCYN-B is free living. The resulting correlation matrices were visualized in  
10 the form of a heat map of hierarchical clustering in R (ver. 3.2.2) using packages 'hmisc' and  
11 'gplots'. Multivariate statistics by redundancy analysis (RDA) was conducted using the R  
12 package 'vegan'. T-tests, in IBM SPSS (ver. 23), were performed to characterize the MA and  
13 SG regions and used the mean concentrations of nutrients at each station as input. For meta-  
14 analysis on the external data from 11 publically available datasets, sampled in the Atlantic,  
15 Pacific and South China Sea, data was acquired from the PANGAEA database and previous  
16 publications (Benavides et al., 2016; Bombar et al., 2011; Church et al., 2005; 2008, Foster et  
17 al., 2007, 2009; Goebel et al., 2010; Kong et al., 2011; Langlois et al., 2008; Moisander et al.,  
18 2008, 2010). We included only datasets with a minimum of 10 data points on the previously  
19 mentioned diazotrophic targets. Note that in all datasets the two UCYN-A phylotypes (A1 and  
20 A2) were not distinguished, and het-3 was excluded since it was rarely quantified. The meta-  
21 analysis was conducted using the software OpenMEE (Wallace et al., 2016) (based on R  
22 package 'metafor'), where correlation coefficients from Spearman's rank were z-transformed  
23 (Fisher's) and tested using weighted random effect models. Graphical visualization of the  
24 mean abundances of the most numerous diazotrophs across the cruise transect was also  
25 performed in IBM SPSS (ver. 23).

**Deleted:** two different regions

**Deleted:** were

**Deleted:** along the cruise transect based on

**Deleted:** environmental parameters, including

**Deleted:** ,

### 3 Results

#### 3.1 Hydrographic conditions

Near surface (0-5m) DIN concentrations were below the quantification limit (bq) in both the MA and SG regions, while the mean surface DIP and DiSi concentrations were below the quantification limit or low across all stations in the MA (bq-0.08  $\mu\text{M}$  and 0.54-0.56  $\mu\text{M}$ , respectively) and significantly ( $p < 0.001$ ; t-test) higher ( $0.18 \pm 0.07 \mu\text{M}$  and  $0.79 \pm 0.04 \mu\text{M}$ , respectively) at the stations in the SG (Table 1). The upper 25-30 m of ~~the euphotic zone~~ had stable temperatures of 29-30  $^{\circ}\text{C}$ , ~~and the thermocline was deeper in the SG compared to the MA~~. The depth of the deep chlorophyll maximum (DCM) was between 70-165 m ~~throughout the cruise~~, except for LD B (DCM at 35 m), which was sampled during a degrading surface phytoplankton bloom. A 30-day composite of the surface chlorophyll *a* (Chl *a*) confirmed the decreasing level of surface fluorescence measured by the CTD package at LD B (data not shown).

**Deleted:** depth

**Deleted:** throughout the cruise transect

**Deleted:** but declined differently in deeper waters for individual stations of the MA compared to the SG as a whole (Suppl. Fig. 2)

#### 3.2 Cross reactivity tests

No amplification was detected for the newly designed UCYN-A1 host oligonucleotides run with the UCYN-A2 as template DNA and vice versa (Suppl. Fig. 1a-b).

Running the het assay in fast mode showed a lower cross-reactivity between the het-1 assay and the het-2 template than vice versa (the het-2 assay and het-1 template) (Suppl. Fig. 1e-f).

In fact, no amplification was detected in the last two template additions and the Ct differences were  $> 9$  when het-1 assay was run with het-2 templates. The UCYN-A2 assay detected the UCYN-A1 template in all but the last template addition and with Ct differences  $> 3$  (1 order of magnitude) while there was a 18-20 difference in Ct value (less gene copies) when UCYN-A1 assay was run in fast mode with UCYN-A2 templates at either annealing temperature (60 $^{\circ}\text{C}$  or 64 $^{\circ}\text{C}$ ) and only the first three template additions ( $10^8$ - $10^6$  *nifH* copies  $\mu\text{L}^{-1}$ ) were detected (Suppl. Fig. 1c-d).

### 3.3 Comparison of ‘at sea’ and lab-based qPCR

In order expedite the sample processing for the ‘at sea’ qPCR, a shortened and modified DNA extraction protocol was performed, 4 depths were sampled, and 4 targets run (UCYN groups).

In total, 44 samples can be compared with results from the parallel archived samples processed in the lab. Moreover, we considered the differences to be noteworthy only when there was at least one order of magnitude difference in detection. A summary of the comparison, including the difference in *nifH* copy abundance is provided in Suppl. Table 2. In addition, a graphical comparison shows a 1:1 relationship between the *nifH* gene copies detected in the ‘at sea’ and archived samples (Suppl. Fig. 3).

In general, the ‘at sea’ and lab based qPCR were similar in quantifying the targets. Discrepancies were noted in 7, 8 and 11 samples, which had higher detection in the ‘at sea’ analyses for UCYN-A1, UCYN-A2 and UCYN-B, respectively. There were fewer instances (3, 4, and 5, respectively) of samples processed in the lab with the full extraction that had higher *nifH* gene abundances for the UCYN-A1, UCYN-A2 and UCYN-B, respectively.

### 3.4 Horizontal and vertical distributions

*Trichodesmium* and UCYN-B were the most abundant diazotrophs and *nifH* gene abundances ranged  $10^4$ - $10^6$  *nifH* copies  $L^{-1}$  at multiple depths (4-6 depths) in the upper water column (0-35 m) (Fig. 1-2; Suppl. Table 3). *Trichodesmium* represented 80-99% of total *nifH* genes detected at 9 out of 17 stations with highest detection in the MA and low to bd in the SG. Microscopy observations and abundances of *Trichodesmium* spp. confirmed a high abundance of free filaments of *Trichodesmium* and *C. watsonii*-like cells at LD B, while colonies were in general rarely observed (Suppl. Table 5).

At stations where *Trichodesmium* was not the most abundant diazotroph (e.g. SD 2, 6, 7, 14, 15, and LD C), UCYN-B had the highest depth integrated *nifH* copy abundance.

1 UCYN-B was also the most consistently detected diazotroph, and was quantifiable from all  
2 stations sampled accounting for 81-100% of the total detected *nifH* gene copies in the SG.  
3 There was also a depth dependency for maximum *nifH* gene abundance such that the average  
4 depth maxima's of *Trichodesmium* ( $1.88 \times 10^6$  *nifH* copies L<sup>-1</sup>) and UCYN-B ( $5.03 \times 10^5$  *nifH*  
5 copies L<sup>-1</sup>) at the stations in the MA were 10 and 25 m, respectively. In the SG, the average  
6 depth maximum for UCYN-B ( $1.50 \times 10^5$  *nifH* copies L<sup>-1</sup>) was the same (25 m), while the  
7 average depth of the *Trichodesmium* maximum ( $1.30 \times 10^4$  *nifH* copies L<sup>-1</sup>) deepened to 31m.

8 Of the three heterocystous cyanobacterial symbiont lineages (het-1, het-2 and het-3),  
9 het-1 was the most dominant (60% detection in total samples, 72 of 120 samples), and similar  
10 to *Trichodesmium*, had higher detection in the stations of the MA region. For example, at  
11 stations SD 2, 4 and 9, het-1 represented 10-15% of the total *nifH* genes quantified in the  
12 depth profiles, but in the total *nifH* genes quantified across the entire transect, het-1 only  
13 represented 1.5 %. Abundances for het-1 ranged between  $10^3$ - $10^5$  *nifH* copies L<sup>-1</sup> (15 of the 18  
14 stations) at multiple depths (0-90 m) and the average depth maximum at MA stations ( $3.11 \times$   
15  $10^4$  *nifH* copies L<sup>-1</sup>) was closer to the surface (15 m) compared to the SG stations ( $1.63 \times 10^3$   
16 *nifH* copies L<sup>-1</sup>; 60 m) (Fig. 1; Suppl. Table 3). Het-2 and het-3 co-occurred with het-1,  
17 however at lower abundances ( $10^2$ - $10^4$  *nifH* copies L<sup>-1</sup>) and often bd. For example, het 2 and  
18 het-3 were bd at all depths sampled in 1 and 3 stations, respectively, located in the SG. The  
19 average depth of maximum abundance (17 m) for het-2 ( $3.89 \times 10^3$  *nifH* copies L<sup>-1</sup>) was  
20 similar to het-1 (15 m), while het-3 ( $1.53 \times 10^3$  *nifH* copies L<sup>-1</sup>) was deeper at 33 m  
21 (considering only the MA stations). Microscopy observations confirmed the presence of *R.*  
22 *intracellularis* at 5 SD stations of the MA and LD B and absence at the SD stations and LD C  
23 of the SG. Noticeable was the co-occurrence of free filaments of *R. intracellularis* and  
24 degrading diatom cells (mainly belonging to the genus *Rhizosolenia*), especially at the SD 5, 6  
25 and 7.



1           The unicellular symbiotic groups, UCYN-A1 and A2 (and their respective hosts), were  
2 the least detected targets. For example, UCYN-A1 was bd in 53% (63 of 120 samples) and  
3 UCYN-A2 was bd in 66% (79 of 120 samples) of samples. UCYN-A1 and A2 represented <  
4 0.4 % of total *nifH* genes detected and UCYN-A symbionts were bd in the SG, except at LD  
5 C. When detected, average *nifH* gene abundance for UCYN-A1 and A2 were  $8.60 \times 10^4$  and  
6  $4.60 \times 10^4$  *nifH* copies L<sup>-1</sup>, respectively, and usually accounted for <1.0-1.5 % of the total *nifH*  
7 gene copies enumerated per station. One exception was at LD C in the SG, when UCYN-A1  
8 and A2 accounted for 4 and 11%, respectively, of the total *nifH* gene copies, and were the  
9 second most abundant diazotroph ( $3.19 \times 10^4$  and  $8.53 \times 10^4$  *nifH* copies L<sup>-1</sup>). The average  
10 depth of maximum *nifH* gene abundance for the UCYN-A1 ( $1.60 \times 10^4$  *nifH* copies L<sup>-1</sup>) and  
11 A2 ( $5.76 \times 10^3$  *nifH* copies L<sup>-1</sup>) symbionts was consistently recorded at deeper depths (55 and  
12 58 m, respectively; 10 % light level).

13           The detection of the UCYN-A1 and A2 hosts mirrored the detection of their respective  
14 symbionts. However, in 22 and 15 samples, respectively, the UCYN-A1 and A2 symbionts  
15 were quantified while their hosts were bd. The UCYN-A hosts were never detected in samples  
16 where their respective symbionts were bd or dnq. When both UCYN-A host and symbiont  
17 were present, the abundances of the host's 18S rRNA genes were always one order of  
18 magnitude less than their respective symbiont's *nifH* genes, with the exception of two samples  
19 for UCYN-A1 symbionts where their respective host 18S rRNA gene abundances were half,  
20 or nearly equal in abundance. UCYN-C was the least abundant unicellular diazotroph and was  
21 only quantified in the 'at-sea' qPCR where detection was poor and limited to the MA region  
22 (3 of 11 stations: 1-3 of 4 depths sampled) and abundances never exceeded  $10^2$  *nifH* copies L<sup>-1</sup>  
23 (Suppl. Table 3).

### 3.5 Diazotroph and UCYN-A host covariation

Several significant correlations between the target diazotrophs and hosts were identified (Fig. 3; Suppl. Table 4a). The *nifH* gene abundances of *Trichodesmium* and UCYN-B were significantly positively correlated with each other (N=108,  $p<0.01$ ). In addition, UCYN-B *nifH* gene copy abundance was significantly positively correlated with those of both UCYN-A symbionts (A1 and A2; N=120,  $p<0.01$ ) and UCYN-A2 host abundance (N=118,  $p<0.04$ ). Abundances of UCYN-A1 and A2 *nifH* genes were significantly positively correlated with each other, and in addition, with their respective host 18S rRNA gene abundances (N=118-120,  $p<0.01$ ). Lastly, the *nifH* gene abundances of het-1, het-2 and het-3 were significantly positively correlated with one another, and with the *nifH* gene abundances of *Trichodesmium* and UCYN-B (N=108-120,  $p<0.01$ ). The only correlations that were not significant were between the UCYN-A (including their hosts) and *Trichodesmium* and the het-groups (with the exception of het-3, which correlated with the UCYN-A2 host (N=118,  $p<0.04$ )).

### 3.6 Influence of environmental conditions on diazotroph and UCYN-A host abundances in the WTSP

The *nifH* gene abundances of UCYN-A1 and A2 were significantly positively correlated with salinity (N=107,  $p<0.02$  and N=107,  $p<0.03$ , respectively) and depth (N=118,  $p<0.01$  and N=118,  $p<0.002$ , respectively) (Fig. 3; Suppl. Table 4b). However, except for het-3 (regarding depth), all other diazotrophs were significantly negatively correlated with salinity (N=97-108,  $p<0.006$ ) and depth (N=108-120,  $p<0.001$ ). Moreover, *Trichodesmium*, UCYN-B, and the het-group (except het-3) were significantly positively correlated with PAR (N=63-72,  $p<0.003$ ) and temperature (N=97-108,  $p<0.001$ ) while UCYN-A1 and A2 were significantly negatively correlated (N=72-108,  $p<0.02$ ) with the latter parameters. All diazotrophic targets, except UCYN-A1, UCYN-A2, and het-3, were significantly negatively correlated with DIN concentration (N=90-94,  $p<0.02$ ). All diazotrophs, except UCYN-A2, were significantly

Deleted: Similarly, all

1 negatively correlated with DIP concentration (N=96-100,  $p<0.02$ ), and all diazotrophs except  
 2 UCYN-A1, A2 and het-3 were significantly negatively correlated with DiSi concentration  
 3 (N=97-102,  $p<0.001$ ). The gene copy abundances for the UCYN-A hosts' and UCYN-A1 and  
 4 UCYN-A2, and UCYN-B were significantly correlated with dissolved oxygen (UCYN-A and  
 5 hosts, N=106-108,  $p<0.003$  and UCYN-B, N=108,  $p<0.03$ ). In general, the correlations  
 6 between nifH gene abundances and several hydrographic parameters divided the diazotrophs  
 7 into two groups: the UCYN-A symbionts (and respective hosts) and all other target  
 8 diazotrophs.

Deleted: of

Deleted: 18S rRNA genes,

Deleted: nifH genes

9 Hierarchical clustering based on the Spearman's rank analyses resulted in two major  
 10 groups: (1) a shallow group and (2) a deep group. The clustering in the euphotic zone was  
 11 inferred from the negative and positive correlations for shallow and deep groups, respectively,  
 12 with depth (Fig. 3). For example, *Trichodesmium* and the symbiotic het-1 and het-2 lineages  
 13 characterize an upper water column (shallow) group with significant clustering and positive  
 14 correlations with temperature (N=97-108,  $p<0.001$ ) and PAR (N=63-72,  $p<0.003$ ), while only  
 15 UCYN-A1 and A2 symbionts and their respective hosts represent the deep group, UCYN-B  
 16 was unique in an overlapping distribution, and resulted in positive significant correlations  
 17 with both the shallow and deep groups euphotic zone diazotrophs (e.g. *Trichodesmium*,  
 18 N=108,  $p<0.001$  and UCYN-A1, N=120,  $p<0.004$ , respectively). Diazotroph targets in the  
 19 deep dwelling group significantly clustered and correlated positively with oxygen, depth,  
 20 salinity and fluorescence (N=108-120,  $p<0.03$ , except for UCYN-A2 and fluorescence,  
 21 N=108,  $p=0.053$ ). Despite clustering with the shallow group, het-3 was less robust in a  
 22 negative correlation with salinity (N=108,  $p=0.005$ ).

Deleted: ;

Deleted: er

Deleted: ,

Deleted: ,

Deleted: ir

Deleted: 1

Deleted: 2

Deleted: (group 1)

Deleted: (group 2)

Deleted: er

Deleted: 2

Deleted: 1

23 The results from the Spearman's rank correlations were further confirmed and  
 24 visualized in the RDA biplot (Fig. 4a), which explains parameter importance (Fig. 4b).  
 25 Correlations with nutrients and PAR were omitted due to the limited number of data points.

1 Fluorescence, depth and salinity correlated positively with each other and negatively with  
 2 temperature, while oxygen was not significantly correlated with any other environmental  
 3 parameters. The response variables UCYN-A1 and A2 and their respective hosts clustered  
 4 with the explanatory variables: fluorescence, salinity and depth, with a dependency towards  
 5 oxygen. On the other hand, the shallow, euphotic group (response variables *Trichodesmium*,  
 6 het-1 and het-2) clustered closer to explanatory variable temperature. In addition, most of the  
 7 observed variance is explained by the two axes RDA1 (72 %) and RDA2 (22 %), indicative of  
 8 depth and temperature, respectively, as the most important environmental parameters for  
 9 diazotroph abundance in our study. Together they form a depth-temperature gradient (RDA1)  
 10 where *Trichodesmium* occupies the warmest and shallowest waters, and UCYN-A1 and A2  
 11 occupies the coldest and deepest waters, among the investigated cyanobacterial diazotrophs.

### 12 **3.7 Global drivers of diazotrophic abundance**

13 We found consistency between our results in the WTSP and the correlations identified in the  
 14 11 external datasets by the non-parametric correlation analyses and meta-analyses (Fig. 5a-d;  
 15 Suppl. Table 6). For example, in three of the external datasets, *nifH* gene abundances of  
 16 *Trichodesmium* spp., UCYN-B, and het-1, were significantly positively correlated with  
 17 temperature and negatively correlated with the same three parameters as in our study in the  
 18 WTSP: salinity, DIP, and DIN. The latter correlations were identified in two regions of the  
 19 WTSP (tropical and subtropical) and in the northern South China Sea (NSCS). In contrast to a  
 20 significant positive correlation between UCYN-A *nifH* gene abundance and depth reported  
 21 here in the WTSP, UCYN-A *nifH* gene abundance was negatively correlated with depth in 4  
 22 of the 11 external datasets (two regions of the WTSP, Tropical Atlantic (TA), and NSCS).  
 23 Moreover, and consistent with several of the other diazotrophs (*Trichodesmium*, UCYN-B,  
 24 het-1), UCYN-A *nifH* gene abundance was negatively correlated with DIP and DIN  
 25 concentrations (5 and 3 additional external datasets, respectively) (Suppl. Table 6).

Deleted: er

Deleted: 1

Meta-analysis revealed similar groupings (e.g. shallow and deep) as observed in the WTSP, however, the significance was less robust (Fig. 5a-d; Suppl. Table 6). For example *nifH* gene abundances of *Trichodesmium* and het-1 and het-2 were significantly positively correlated with temperature and negatively correlated with salinity ( $p < 0.05$ ). No significance was found for UCYN-A *nifH* gene abundance for the latter parameters, and UCYN-B *nifH* gene abundance was not significantly correlated with salinity, but was significantly positively correlated with temperature ( $p < 0.05$ ). In addition, UCYN-A was the only diazotroph that was not significantly correlated with het-2, while all other diazotrophs had a significant positive correlation with het-2 ( $p < 0.05$ ). Similar to our findings reported for the WTSP, all diazotrophs, except UCYN-A, correlated significantly negatively with depth, DIP and DIN concentrations ( $p < 0.05$ ) (except het-2 with DIP which was not significant). Finally, UCYN-B and het-1 *nifH* gene abundances were significantly negatively correlated with Chl *a* ( $p < 0.05$ ), while *Trichodesmium*, UCYN-A and het-2 were not.

## 4 Discussion

### 4.1 Environmental conditions in the WTSP

The SP is one of the most oligotrophic regions of the world's oceans with chronically low dissolved nutrient concentrations, especially DIN, and thus, is considered an area primed for  $N_2$  fixation. Likewise, we encountered surface hydrographic conditions in the WTSP that were consistently low in dissolved nutrient concentrations and similar to earlier reports for the equatorial Pacific (Bonnet et al., 2009; Dufour et al., 1999; Moutin et al., 2008; Van Den Broeck et al., 2004). The conservative tracers of temperature and salinity remained constant in the surface between the MA and SG regions, hence the elevated nutrient concentrations in the SG is likely not related to an eddy intrusion. The deviation away from a 16:1 relationship (Redfield ratio) (data not shown) in the upper 125 m in both regions (MA and SG) was indicative of DIN limitation. The low DIP concentrations in MA waters suggest utilization of

DIP by diazotrophs in the absence of DIN, however, other sources of nitrogen were likely available to the phytoplankton community, e.g. dissolved organic nitrogen and N<sub>2</sub> fixation (Karl et al., 2001).

#### 4.2 Detection of diazotrophs and application of ‘at sea’ qPCR

*Trichodesmium*, UCYN-B, and the het-group are easily identifiable by standard epifluorescence microscopy, and so these populations can readily be observed ‘at sea’. However, the UCYN-A1 and UCYN-A2, and their respective hosts, require a lengthy fluorescent *in situ* hybridization (FISH) protocol that is difficult to implement in the field. On the other hand, modern oceanographers have a suite of other molecular genetic tools, some of which are also ‘sea-going’ and autonomous (e.g. Robidart et al. 2014; Ottesen et al. 2013; Preston et al. 2011), thereby making quantification of microscopically unidentified microorganisms tangible by quantifying their genes, simultaneous with collection of hydrographic data. Here, we describe a rather effective, steadfast (within 3 hrs of sample collection), and ‘sea-going’ nucleic acid extraction and qPCR technique to quantify diazotrophs by their *nifH* gene, which was used in real time during the OUTPACE cruise to help locate the LD stations for the purpose of the project (see Moutin et al., this issue). The comparisons of the ‘at sea’ assays to the lab-based full extraction protocol and qPCR on archived samples indicated that the assays were consistent (Suppl. Fig. 3a-c), and surprisingly the shortened DNA extraction performed ‘at sea’ had higher abundances for all three targets (UCYN-A1, UCYN-A2 and UCYN-B) in 16-25 % of the samples processed, depending on the target diazotroph.

The disparity between the enumerations made ‘at sea’ and in the lab-based samples could result from technical and/or sampling differences. For example, we do not know the DNA extraction efficiency of either method used (‘at sea’ vs. lab based), nor if extraction efficiency varies for a particular target e.g. UCYN-A or UCYN-B. Variations between samples or replicates could be attested to different DNA extractions varying in their efficiencies based on

1 target organism (Boström et al., 2004). Some strains of UCYN-B are known to secrete thick  
2 extracellular matrix (ECM) (Sohm et al. 2011), while others form dense colonies, and some  
3 are symbiotic with diatoms (Carpenter and Janson, 2000). Moreover, the UCYN-A symbioses  
4 are considered fragile and easily dismantled (Thompson et al., 2012). The latter observations  
5 could potentially result in differences in extraction efficiency, which is supported by  
6 significant disparities in all samples where the UCYN-A hosts were enumerated. However we  
7 find no clear pattern in higher detection for one method ('at sea' vs. lab-based assays) or one  
8 particular target. Despite taking the samples from the same Niskin bottle for the archived and  
9 'at sea' assays, we cannot discount the natural heterogeneity of plankton and differences in  
10 settling, and that perhaps some samples were more enriched than others. Seldom are replicates  
11 processed in qPCR studies as those presented here, and so the disparity reported here  
12 highlights the need to address variation derived from sampling and/or extraction efficiencies.  
13 Nonetheless, 'at sea' (and lab-based) qPCRs could also be appended with a multi-plexing  
14 approach to both increase and broaden the number of metabolic pathways (e.g. *narB*, *rbcL*,  
15 *nirS*) and/or phylotypes quantified simultaneously.

#### 16 **4.3 Abundance and vertical distribution of diazotrophs in the WTSP**

17 Earlier work based on N isotope ratios (delta <sup>15</sup>N) of suspended particulate matter and  
18 dissolved organic N (DON) in the WTSP suggested that new production is likely fueled by N<sub>2</sub>  
19 fixation in this region (Hansell and Feely, 2000; Yoshikawa et al., 2005). The SP is also an  
20 area where high *nifH* gene abundances of the unicellular diazotrophs, in particular UCYN-A  
21 and UCYN-B, have been previously reported (Biegala and Raimbault, 2008; Bonnet et al.,  
22 2009, 2015; Moisander et al., 2010) and account for a significant (74%) portion of the areal  
23 N<sub>2</sub> fixation (Bonnet et al., 2009). Hence, it was likely to encounter the presence of  
24 diazotrophic populations.

1 Recently UCYN-A and its various lineages have been highlighted as one of the most  
 2 widespread and abundant diazotrophs (Farnelid et al., 2016 and references therein), which has  
 3 led to the dramatic shift in the canonical paradigm of *Trichodesmium* as the only significant  
 4 diazotroph. Surprisingly, here, we report *nifH* gene abundances of the UCYN-A1 and UCYN-  
 5 A2 lineages that are comparatively lower than earlier reports. In fact, UCYN-A1 and A2 were  
 6 the least detected diazotrophs of our targets. Consistent with higher UCYN-A1 and A2  
 7 biomass ( $3.2 \times 10^4$  and  $8.5 \times 10^4$  *nifH* copies L<sup>-1</sup>, respectively) at depth (60 m) at LD C were  
 8 microscopy observations of high abundances of picoeukaryotes similar in size and shape  
 9 previously reported for the UCYN-A hosts (Krupke et al. 2013). The vertical distribution of  
 10 UCYN-A1 (and A2) was similar to that reported by Moisander et al. (2010) and others,  
 11 including earlier studies in the North Pacific Ocean (NP) and North Atlantic (NA), where  
 12 maximum abundances of UCYN-A are common to deeper depths in the euphotic zone (below  
 13 45 m) (e.g. Bonnet et al., 2015; Foster et al., 2007; Goebel et al., 2010; Needoba et al., 2007).  
 14 Likewise, we also observed as others (Cabello et al., 2016) that the UCYN-A1 and A2  
 15 symbioses co-occur and typically have decreased abundance towards the DCM, and  
 16 maximum abundances slightly above the nitracline.

**Deleted:** Both UCYN-A phylotypes were largely restricted to the MA, with the exception of high densities ( $3.2 \times 10^4$  and  $8.5 \times 10^4$  *nifH* copies L<sup>-1</sup>, respectively) found at one depth (60 m) of LD C, which borders the MA region.

17 Unlike UCYN-A phylotypes, high *nifH* gene abundances of *Trichodesmium* was  
 18 common in the upper 10 m of the MA region, and included both surface slicks and free  
 19 filaments, which was consistent with earlier observations of high surface densities further  
 20 north in the SP (Moisander et al., 2010; Shiozaki et al., 2014), as well as regional satellite  
 21 observations of blooms (Dupouy et al., 2011). Surface slicks have also been reported  
 22 elsewhere, e.g. the NA (Goebel et al., 2010; Langlois et al., 2005). The depth of maximum  
 23 *nifH* gene abundance for *Trichodesmium* deepened from the MA (10 m) region to the open  
 24 gyre (SG, 31 m), which was similar to earlier reports in the equatorial Pacific (Bonnet et al.,  
 25 2009). A niche partitioning has been suggested for *Trichodesmium* and unicellular diazotrophs

**Deleted:** UCYN-B and *Trichodesmium* were the most abundant diazotrophs in the WTSP, and UCYN-B in particular was the most detected phylotype (99% detection; dnq or higher in 119 of 120 samples). H

**Deleted:** ing

**Deleted:** presence of

**Deleted:** was widespread in the MA region and

**Deleted:** i



1 in the SP (Bonnet et al., 2015; Moisander et al., 2010) and elsewhere (Goebel et al., 2010;  
2 Langlois et al., 2005; Messer et al., 2015). However, here in the WTSP, *Trichodesmium*  
3 abundance was positively correlated with UCYN-B, which instead is consistent with previous  
4 studies in other ocean basins, e.g. [the](#) Atlantic Ocean (Foster et al., 2007, 2009; Langlois et  
5 al., 2008), and the South China Sea (Moisander et al., 2008). UCYN-B co-occurred with  
6 *Trichodesmium* in the surface samples, although at [lower](#) *nifH* [gene](#) abundances, and more  
7 often UCYN-B had subsurface maxima (35-70 m) in both regions (MA and SG) of the  
8 transect. The latter is also consistent with Moisander et al. (2010) who observed maximum  
9 [nifH](#) [gene](#) abundances of UCYN-B north of the Fijian islands at 37m.

10 All 3 heterocystous symbiont phylotypes co-occurred and were widespread in the MA,  
11 with het-1 as the most abundant and most highly detected het group (70% detection or 84 of  
12 120 samples). The early work of Moisander et al. (2010) detected het-1 in all but one of 26  
13 stations sampled (56% detected, or 56 of 100 samples), and highest *nifH* [gene](#) densities were  
14 reported north east of our cruise transect. Moreover, Bonnet et al. (2015) detected het-1 and  
15 het-2 at the surface of one out of 10 stations west (approximately 10 degrees W) of our cruise  
16 transect. Het-2 and het-3 were not quantified by Moisander et al. (2010) and het-3 was not  
17 quantified by Bonnet et al. (2015). Therefore our study is among the first to report on the  
18 abundances and distributions for all 3 heterocystous diazotrophs in a large expanse of the SP.  
19 The three het phylotypes were however recently reported from a mesocosm (enclosed design)  
20 experiment in the Noumea lagoon, a low nutrient low chlorophyll (LNLC) region located  
21 along the New Caledonian coast (Turk-Kubo et al., 2015). In fact, het-1 and het-2 were among  
22 the most abundant diazotrophs in the first half of the experiment (Turk-Kubo et al., 2015).  
23 Two additional earlier studies have also reported microscopic observations of free-living  
24 *Richelia* in the same lagoon (Biegala and Raimbault, 2008; Garcia et al., 2007).

The highest densities ( $10^4$ - $10^6$  *nifH* copies L<sup>-1</sup>) of the *Richelia* phylotypes (*het-1* and *het-2*) were restricted to the western region of the MA, and in the upper 12 m, which is shallower than the subsurface maximum (e.g.  $> 25$  m) previously reported for *het-1* (and *het-2*) in the Western Tropical North Atlantic (WTNA) and NP (Church et al., 2005; Foster et al., 2007; Goebel et al., 2010). Our microscopy observations from SD 5-7 and LD A indicated that near surface *Rhizosolenia* populations were in a moribund state since frustules were broken and free filaments of *Richelia* were observed. Our observations also coincide with a region of high backscattering measurements in the upper water column (5-30 m) (Dupouy et al., this issue). *Het-1 nifH genes* were four orders of magnitude higher in abundance in the moored sediment traps of LD A (325 m:  $2.0 \times 10^7$  *nifH* copies L<sup>-1</sup>) and LD B (325 and 500m:  $5.8 \times 10^6$  and  $1.10 \times 10^7$  *nifH* copies L<sup>-1</sup>, respectively) (Caffin et al., this issue) than the *nifH genes* detected in the overlying waters ( $3.11 \times 10^3$  *nifH* copies L<sup>-1</sup> and  $4.1 \times 10^2$  *nifH* copies L<sup>-1</sup>, respectively). Combined, the latter observations suggest that a higher density of the *het-1* population was likely present prior to our sampling and perhaps derived from a ‘seed’ population originating in the coastal regions of New Caledonia, and that they play an important role for export production in this region, as has previously been shown in e.g. the NP (Karl et al., 2012).

Deleted: commonly

The UCYN-C phylotype was poorly detected in the ‘at sea’ assays (61% samples were detected and maximum abundance was  $5.0 \times 10^2$  *nifH* copies L<sup>-1</sup>), and as such was not enumerated in the archived samples. The low detection of UCYN-C is consistent with Taniuchi et al. (2012), who estimated that UCYN-C only represented a small portion of diazotrophs detected in the western Pacific (Kuroshio Current). However, a recent study reported relatively high UCYN-C abundances in the open waters of the Solomon Sea (north of the MA) (Berthelot et al., submitted). UCYN-C has also been observed in the New Caledonian lagoon (Turk-Kubo et al., 2015), where it was the most dominant diazotroph in the first part of the aforementioned

mesocosm experiment (Turk-Kubo et al., 2015). Moreover, Turk-Kubo et al. (2015) reviewed the specificity of the UCYN-C assay used in our study (Foster et al., 2007) and concluded that it does quantify a majority of UCYN-C phylotypes. Hence, like most plankton, abundances can be patchy as was observed with UCYN-C in our study.

#### 4.4 UCYN-A and host (co)-occurrence

Earlier and recent work has suggested a high host dependency (e.g. smaller and streamlined genomes), and selectivity in the UCYN-A based symbioses (Cabello et al., 2016; Cornejo-Castillo et al., 2016; Farnelid et al., 2016; Krupke et al., 2013, 2014; Thompson et al., 2012; Tripp et al., 2010). Moreover, the UCYN-A partnerships are also considered mutualistic, where the host and symbiont both benefit by exchange of metabolites (e.g. reduced C and N, respectively) (Krupke et al., 2014; Thompson et al., 2012) and based on streamlined genome content of UCYN-A, it has a photo-fermentative metabolism dependent on other organisms (Tripp et al., 2010; Zehr et al., 2008). Hence one would expect parallel distributions for both partners. Some have argued that the partnership is also obligatory since few observations of free-living hosts have been reported and abundances of free symbionts assumed to be derived from disruption during sample preparation are always correlated with their hosts (Cabello et al., 2016; Krupke et al., 2014; Thompson et al., 2012). Thus, by use of our newly designed oligonucleotides for the UCYN-A1 host and previously designed oligonucleotides for the UCYN-A2 host (Thompson et al., 2014), we unexpectedly found that both UCYN-A1 and A2 were often (89% and 59%, respectively; not considering dnq) detected in the absence (or bd) of their respective hosts, while the hosts, when detected, always coincided with increased UCYN-A abundance. Our observations could result if the UCYN-A lineages live in either a loose association, or perhaps with a wider diversity of hosts than detected by the UCYN-A host assays.

The number of cells per partner lineage is considered specific as well, such that 1-2

UCYN-A1 cell(s) is associated with a prymnesiophyte partner (UCYN-A1 host) and the larger *B. bigelowii* (UCYN-A2 host) host associates with multiple and variable numbers of UCYN-A2 cells to compensate for its higher N requirement (Cornejo-Castillo et al., 2016).

We consistently observed higher abundances of the *nifH* genes for the UCYN-A1 and A2 symbionts compared to their respective hosts' 18S rRNA genes (2-10 and 6-34 times more abundant, for A1 and A2, respectively). Similar results were found by Thompson et al. (2014) who observed symbiont/host ratios of 0.2-11. However, a higher detection of the UCYN-A 1 (and A2) in absence of the host detection would result if there is a broader diversity of hosts associated with the UCYN-A symbionts. Ultimately a CARD-FISH approach using the same 18S rRNA oligonucleotide as in the qPCR would help distinguish the discrepancy between the partner gene copy abundances.

A symbiosome-like compartment has also been described attached to the UCYN-A2 host or residing free (Cornejo-Castillo et al., 2016). Thus, another plausible explanation for the higher abundances of the UCYN-A2, in particular, in the absence of their respective host, could result if our assays quantified UCYN-A2 residing in a dislodged free-floating symbiosome, or an overestimate of the UCYN-A2 due to cross-reactivity with UCYN-A3 lineage as expected by *in silico* tests (Farnelid et al. 2016). It is less likely that the UCYN-A2 was overestimated due to cross-reaction with UCYN-A1 templates since our cross-reactivity tests showed a weak cross-reaction (see below).

#### **4.5 Environmental influence on diazotroph abundances and distributions**

The annual N inputs through biological N<sub>2</sub> fixation in the oceans is considered high, ranging from 100-200 Tg N (Eugster and Gruber, 2012; Luo et al., 2012), yet large uncertainties remain in what factor(s) influence the abundance, distribution, and activity of marine diazotrophs. Initially, we hypothesized that the conditions favoring a particular cyanobacterial

1 diazotroph would be unique given the contrasting life histories of different diazotrophic  
2 groups (free-living, colonial, and symbiotic). Moreover, we also suspected that the conditions  
3 promoting DDAs would differ from those influencing the UCYN-A based symbioses given  
4 the vast differences in the symbionts and hosts (e.g. genome content of symbiont, cell size of  
5 symbiont and hosts in the two systems; expected number of symbionts/host; host phylogeny:  
6 diatom vs. prymnesiophyte). Thus, determining the condition or sets of conditions that drive  
7 cyanobacterial diazotroph distribution, abundance, and activity is of great interest.

Deleted: differ

8 Hydrographic conditions and dissolved nutrient concentrations measured at the time of  
9 sampling were used to correlate diazotrophic abundances with various environmental  
10 parameters. Consistently, in two independent statistical tests, two groups emerged in the  
11 WTSP; 1) UCYN-A1 and A2 and their respective hosts 2) het-1, het-2 het-3, UCYN-B and  
12 *Trichodesmium*. Thus, conditions favoring the UCYN-A based symbioses differ from the  
13 conditions for DDAs, and free-living cyanobacterial diazotrophs.

Deleted: agreeing with our initial hypothesis that

14 Temperature is often cited as the most important driver of diazotroph abundance and  
15 distribution (Messer et al., 2016; Moisander et al., 2010), and recently marine nitrogen  
16 fixation was shown to be controlled by surface irradiance and dissolved oxygen concentration  
17 (Luo et al., 2014). As shown earlier in the WTSP, both *Trichodesmium* spp. and UCYN-B  
18 were most abundant in warmer surface waters (> 27 °C) in the north, while UCYN-A  
19 dominated in the cooler (24-26 °C) southern waters of WTSP (Bonnet et al., 2015; Moisander  
20 et al., 2010). Likewise, we found similar abundances and temperature optima for the latter  
21 three diazotrophs and significant correlations between the various diazotrophs and  
22 temperature. In fact, all diazotrophs, except the UCYN-A lineages were significantly  
23 positively correlated with temperature in the WTSP. In addition to temperature, the  
24 environmental parameters of PAR, salinity and depth were also significantly influencing nifH  
25 gene abundance and distribution. Moreover, the latter two variables separated the abundances

1 of the UCYN-A symbioses (A1 and A2) from the rest of the diazotrophs in the WTSP,  
2 including both free-living phylotypes and the symbiotic heterocystous lineages.

3 The maximum abundances at depth for UCYN-A1 and A2 were slightly above or at the  
4 nitracline and coincided with higher measures of fluorescence from the CTD. The latter is  
5 consistent with observations of high UCYN-A abundances in coastal habitats (Bombar et al.,  
6 2014), estuaries (Messer et al., 2015), or in waters that have been recently entrained with new  
7 nutrients (Moisander et al., 2010). Increased *nifH* copies and/or *nifH* gene expression for  
8 UCYN-A have also been reported from bioassay experiments amended with nutrients,  
9 including DIN, phosphate and iron (Krupke et al., 2015; Langlois et al., 2012; Moisander et  
10 al., 2012). The latter is in contrast with the data reported here in the WTSP (including the  
11 meta-analysis) and several of the external datasets (e.g. WTSP, TA, NA, NSCS), which finds  
12 a negative correlation between DIN and DIP concentrations and *nifH* gene abundance of most  
13 of the diazotrophs, including UCYN-A. Across the cruise transect conditions were instead  
14 favoring diatoms in symbiosis with diazotrophs, since surface DIP and DiSi concentrations  
15 were considered not limiting (Thierry Moutin, this issue), while DIN was below detection,  
16 and as reported here, resulted in higher abundances of het-1 *nifH* gene copies and observations  
17 of *Rhizosolenia* hosts in the MA. In the WTNA, waters with high DiSi concentration and low  
18 N:P ratios, driven by a disproportionate utilization of N relative to P, results in consistent and  
19 widespread blooms of the *Hemiaulus-Richelina* symbioses (het-2) (Foster et al., 2007;  
20 Subramaniam et al., 2008).

21 All the diazotrophs described here are either photoautotrophic or associated with  
22 photoautotrophic partners (UCYN-A, het-group). Therefore, light irradiance (e.g. PAR) and  
23 availability will impact the abundance and distribution of the diazotrophic populations.  
24 Results from CARD-FISH observations of the UCYN-A1 and A2 symbioses have reported a  
25 strong dependency on light intensity, which results in higher abundances nearer to the surface

**Deleted:** Moreover, and related to light availability is the influence of day length or changes in the photoperiod which can influence diazotroph distribution, in particular the symbiotic diatoms (Karl et al., 2012).

1 (Cabello et al., 2016). Presence in shallower waters is also thought to be strategic for avoiding  
2 competition (Cabello et al. 2016). However, in the WTSP, in 11 of the 14 stations where  
3 UCYN-A1 and A2 were detected at sub-surface depth maxima, the same lineages (and  
4 corresponding hosts) were undetected at the surface and displayed a negative correlation with  
5 PAR. Microscopy observations also confirmed higher numbers of pico-eukaryotes at depth.  
6 Hence, it would appear that low light correlates with high abundances of UCYN-A; while the  
7 other free-living diazotrophs and symbiotic het-1 and het-2 were positively correlated with  
8 PAR, and had maxima closer to the surface with higher PAR. Interestingly, we found no  
9 significant correlation between PAR and the UCYN-A host lineages, which is unexpected,  
10 since the host partners require light for photosynthesis.

11 In an attempt to identify the consistency in the correlation patterns identified in the  
12 WTSP with other regions of the world's ocean, the same statistical analyses were performed  
13 on 11 publically available datasets and subsequently run through a meta-analysis. Our  
14 statistical analyses provided coefficients and p-values for easy evaluation and comparisons  
15 between data sets for the influence of environmental parameter(s) and diazotroph abundance.  
16 It confirmed that UCYN-A indeed stands out from the other diazotrophs in terms of  
17 environmental parameter influence, mainly by not being significantly correlated with  
18 temperature, which for all other diazotrophs was a significant positive correlation. In terms of  
19 temperature, UCYN-A has the lowest temperature optimum among the target cyanobacterial  
20 diazotrophs, which will influence their distributions and subsequent correlation with  
21 temperature both regionally and vertically. The studies in the meta-analysis include a wide  
22 geographical range and independent of ocean basin a majority of the datasets found no  
23 significant correlation between UCYN-A and temperature. For most other environmental  
24 parameters the pattern for UCYN-A in the WTSP does not hold true in the meta-analysis. For  
25 example a significant negative correlation with depth was found for UCYN-A and perhaps

**Deleted:** especially

**Deleted:** it is

**Deleted:** that

**Deleted:** was conducted in

**Deleted:** where a majority of the datasets

**Deleted:** , in all ocean basins included, showed

related to high surface temperatures, given that Moisander et al. (2010) observed UCYN-A closer to the surface in the southern SP where surface temperatures were typically cooler.

However, for the other target diazotrophs, depth and salinity follow the same pattern as observed in the WTSP (except for UCYN-B which was not significantly correlated with salinity). Interestingly, UCYN-B seems to be mostly detected in the Pacific, where it also was found to be significantly negatively correlated with salinity, while in the Atlantic, perhaps due to lower detections or riverine impact, it was not significantly correlated resulting in no significant correlation in the meta-analysis overall. Furthermore, what did unify all diazotrophs in the meta-analysis were their consistent significant positive correlations with each other and significant negative correlations between abundance and concentrations of DIP and DIN, which was also observed in the WTSP, and again UCYN-A was the exception.

In summary, the correlations observed in the WTSP were not always consistent with the meta-analysis of the external datasets. We attribute the inconsistencies in part to seasonal differences in sample collections, and the impact of an individual environmental parameter or sets of parameters on a local and regional scale, particularly for coastal studies, that make it difficult to unambiguously explain the abundance and distribution patterns. Determining the condition or sets of conditions favoring one diazotroph or life history strategy (free-living vs. symbiotic) is complex and likely not all diazotrophs are influenced by the same condition in time and space.

#### 4.6 Estimation of diazotrophs by nifH qPCR

When interpreting abundance estimates by qPCR there are a few assumptions to keep in mind.

A limitation of qPCR assays is that gene copies do not equal cell abundances. Recent evidence in filamentous and heterocystous cyanobacteria reports evidence of polyploidy dependent on cell cycle (Griese et al., 2011; Sargent et al., 2016; Sukenik et al., 2012). Moreover, *Trichodesmium* may contain up to 100 genome copies per cell (Sargent et al.,

**Deleted:** caveat

**Deleted:** assumes that there is one gene copy per

**Deleted:** However, r



2016), thus a potential for overestimation. On the other hand, underestimation of gene copies by qPCR is also plausible if one considers that DNA extraction efficiency is not 100% and can vary between species and DNA extraction kits (Mumy and Findlay, 2004), and if high probe specificity favors exclusion of closely related phylotypes for a particular target or lineage.

A final consideration with qPCR as shown here, is the degree of cross-reactivity in assays targeting closely related lineages (e.g. UCYN-A and het). Oligonucleotide specificity as a source of underestimation of the UCYN-A lineages was recently reviewed by a *de nova* analyses (Farnelid et al., 2016) showing the potential to underestimate UCYN-A sublineages since the widely used oligonucleotides for UCYN-A1 contains several mismatches to the other UCYN-A sublineages. The latter becomes important when the sublineages co-occur. Here, however, we highlight the potential to overestimate. For example, UCYN-A2 oligonucleotides amplified the UCYN-A1 templates, indicating a tendency to overquantify UCYN-A2 in the presence of A1. Moreover, when the annealing temperature was set to 64 °C, to distinguish between UCYN-A1 and A2 as recommended by Thompson et al. (2014), the assay still failed to separate the two sub-lineages when run in fast mode. Thus, the fast mode feature has a shortcoming that could influence a wider range of targets than the ones presented here. We observed the same cross-reactivity reported earlier (Foster et al., 2007) for het-1 and het-2 when run in fast mode and highlights the potential to overestimate het-2 if het-1 co-occurs at densities approximately  $10^6$  *nifH* copies L<sup>-1</sup>. The latter observation has never been reported.

## Conclusions

Consistent with earlier observations in the WTSP, we found diazotrophic cyanobacteria to be abundant, with the most abundant cyanobacterial diazotrophs being UCYN-B, *Trichodesmium* and the symbiotic *Richelia* lineage het-1. Although the cell integrity and

1 detection of het-1 in water column samples and those from depth (e.g. sediment traps)  
2 indicated that the populations were in a senescent state, our work represents one of the first  
3 documentation of the three DDA populations in a wide expanse of the WTSP. In contrast to  
4 earlier work in the SP and other recent reports from global ocean surveys (Farnelid et al.,  
5 2016; Martínez-Pérez et al., 2016), we observed low abundances and poor detection of both  
6 UCYN-A (A1 and A2) lineages. According to our qPCR results, UCYN-A was also  
7 enumerated when their respective hosts were below detection, which contrasts to the assumed  
8 high fidelity and dependency in the partnerships; however, we cannot discount that the  
9 disparity in host-symbiont detection was not a result from qPCR oligonucleotide assay bias  
10 and/or overestimations indicated by our cross-reactivity tests.

11 Our initial hypothesis was that the condition or sets of conditions, which promote the  
12 distribution of one diazotroph, would differ. Moreover, the parameters for symbiotic  
13 diazotrophs should also differ from that of free-living phylotypes, and given the vast  
14 difference in hosts (diatoms and prymnesiophyte, respectively) and genome content for the het  
15 and UCYN-A symbionts, we further hypothesized divergent conditions favoring one  
16 symbiosis over another. In the WTSP, the same conditions favored abundances of both the  
17 free-living phylotypes and the diatom (het groups) symbioses. However, the same conditions  
18 impacted the abundance of UCYN-A based symbiosis negatively, hence, somewhat  
19 supporting our initial hypothesis that conditions for one symbiosis type would differ. In the  
20 external datasets, however, we observed differences in environmental conditions favoring  
21 abundances of the investigated diazotrophs compared to the WTSP, which underscores that  
22 diazotrophs are not similarly influenced by the same condition in time and space.

23 Multivariate approaches on numerous parameters and with high spatial resolution are  
24 required to understand the complex and often indirect effects that govern species distribution.  
25 Finally, this study highlights [the application and considerations of ‘at sea’ qPCR for steadfast](#)

1 quantification of microbial populations. Moreover, a meta-analysis was used to determine the  
2 influence of environmental parameters on the distribution and abundance of diazotrophs in the  
3 SWP region and in other ocean basins. However, it is of great interest to know, if the same  
4 parameters influence gene expressions (e.g. *nifH*), and ultimately N<sub>2</sub> fixation rates, in the  
5 same manner, thus, understanding the weight of environmental parameters influencing  
6 diazotrophic abundance and distribution. Given the global significance of N<sub>2</sub> fixation as a  
7 major new source of N to the oceans, the meta-analysis presented here could be directly  
8 applicable to improving parameter constraints on model-based approaches for predicting areas  
9 prone to diazotrophy.

1   **Competing interests**

2   The authors declare that they have no conflict of interest.

3   **Acknowledgements**

4   The participation (MS and AC), sample processing, and work presented here is supported by  
5   Knut and Alice Wallenberg foundation (to RAF). This is a contribution to the OUTPACE  
6   (Oligotrophy from Ultra-oligoTrophy PACific Experiment) project funded by the French  
7   research national agency (ANR-14-CE01-0007-01), the LEFE-CyBER program (CNRS-  
8   INSU), the GOPS program (IRD) and the CNES (BC T23, ZBC 4500048836). The  
9   OUTPACE cruise (<http://dx.doi.org/10.17600/15000900>) was managed by T. Moutin and S.  
10   Bonnet from the MIO (Mediterranean Institute of Oceanography). T. Moutin is specifically  
11   thanked for invaluable input and feedback on this paper. The authors thank the crew of the  
12   R/V *L'Atalante* for outstanding shipboard operation. G. Rougier and M. Picheral are thanked  
13   for their efficient help in CTD rosette management and data processing, as is Catherine  
14   Schmechtig for the LEFE CYBER database management. All data and metadata are available  
15   at the following web address: <http://www.obs-vlfr.fr/proof/php/outpace/outpace.php>. Special  
16   acknowledgement to Andreas Krupke (formerly of WHOI), Kyle Frischkorn (WHOI), Mar  
17   Benavides (MIO/IRD), Hugo Berthelot (MIO), and Mathieu Caffin (MIO). Olivier Grosso  
18   (MIO) and Sandra Hélias (MIO) are acknowledged for nutrient analyses. Additionally we  
19   thank Dr. Lotta Berntzon for assisting in sample processing and Konrad Karlsson for  
20   assistance with the multivariate statistics. Lastly, we thank Dr. Bethany Jenkins and Prof.  
21   Anders Bignert for invaluable feedback and suggestions on our manuscript.

Field Code Changed

## 1 References

- 2 Aminot, A. and K  rouel, R.: Dosage automatique des nutriments dans les eaux marines:  
3 m  thodes en flux continu, in M  thodes d'analyse en milieu marin, edited by Ifremer, p. 188.  
4 [online] Available from: <http://cat.inist.fr/?aModele=afficheN&cpsidt=18706171> (Accessed 1  
5 December 2016), 2007.
- 6 Benavides, M., Bonnet, S., Hern  ndez, N., Mart  nez-P  rez, A. M., Nieto-Cid, M.,   lvarez-  
7 Salgado, X. A., Ba  os, I., Montero, M. F., Mazuecos, I. P., Gasol, J. M., Osterholz, H.,  
8 Dittmar, T., Berman-Frank, I. and Ar  stegui, J.: Basin-wide N<sub>2</sub> fixation in the deep waters of  
9 the Mediterranean Sea, *Global Biogeochem. Cycles*, 30(6), 2015GB005326,  
10 doi:10.1002/2015GB005326, 2016.
- 11 Bench, S. R., Heller, P., Frank, I., Arciniega, M., Shilova, I. N. and Zehr, J. P.: Whole genome  
12 comparison of six *Crocospaera watsonii* strains with differing phenotypes, *J. Phycol.*, 49(4),  
13 786–801, doi:10.1111/jpy.12090, 2013.
- 14 Berman-Frank, I., Lundgren, P., Chen, Y.-B., K  pper, H., Kolber, Z., Bergman, B. and  
15 Falkowski, P.: Segregation of Nitrogen Fixation and Oxygenic Photosynthesis in the Marine  
16 Cyanobacterium *Trichodesmium*, *Science*, 294(5546), 1534–1537,  
17 doi:10.1126/science.1064082, 2001.
- 18 Berthelot, H., Moutin, T., L'Helguen, S., Leblanc, K., H  lias, S., Grosso, O., Leblond, N.,  
19 Charri  re, B. and Bonnet, S.: Dinitrogen fixation and dissolved organic nitrogen fueled  
20 primary production and particulate export during the VAHINE mesocosm experiment (New  
21 Caledonia lagoon), *Biogeosciences*, 12(13), 4099–4112, doi:10.5194/bg-12-4099-2015, 2015.
- 22 Biegala, I. C. and Raimbault, P.: High abundance of diazotrophic picocyanobacteria (<3 µm)  
23 in a Southwest Pacific coral lagoon, *Aquat Microb Ecol*, 51(1), 45–53,  
24 doi:10.3354/ame01185, 2008.
- 25 Blain, S., Sarthou, G. and Laan, P.: Distribution of dissolved iron during the natural iron-  
26 fertilization experiment KEOPS (Kerguelen Plateau, Southern Ocean), *Deep Sea Research*  
27 Part II: Topical Studies in Oceanography, 55(5–7), 594–605, doi:10.1016/j.dsr2.2007.12.028,  
28 2008.
- 29 Bombar, D., Moisander, P. H., Dippner, J. W., Foster, R. A., Voss, M., Karfeld, B. and Zehr,  
30 J. P.: Distribution of diazotrophic microorganisms and nifH gene expression in the Mekong  
31 River plume during intermonsoon, *Mar Ecol Prog Ser*, 424, 39–52, doi:10.3354/meps08976,  
32 2011.
- 33 Bombar, D., Heller, P., Sanchez-Baracaldo, P., Carter, B. J. and Zehr, J. P.: Comparative  
34 genomics reveals surprising divergence of two closely related strains of uncultivated UCYN-  
35 A cyanobacteria, *ISME J*, 8(12), 2530–2542, doi:10.1038/ismej.2014.167, 2014.
- 36 Bombar, D., Paerl, R. W. and Riemann, L.: Marine Non-Cyanobacterial Diazotrophs: Moving  
37 beyond Molecular Detection, *Trends in Microbiology*, 24(11), 916–927,  
38 doi:10.1016/j.tim.2016.07.002, 2016.
- 39 Bonnet, S., Biegala, I. C., Dutrieux, P., Slemons, L. O. and Capone, D. G.: Nitrogen fixation  
40 in the western equatorial Pacific: Rates, diazotrophic cyanobacterial size class distribution,  
41 and biogeochemical significance, *Global Biogeochem. Cycles*, 23(3), GB3012,  
42 doi:10.1029/2008GB003439, 2009.

1 Bonnet, S., Dekaezemacker, J., Turk-Kubo, K. A., Moutin, T., Hamersley, R. M., Grosso, O.,  
2 Zehr, J. P. and Capone, D. G.: Aphotic N<sub>2</sub> Fixation in the Eastern Tropical South Pacific  
3 Ocean, PLOS ONE, 8(12), e81265, doi:10.1371/journal.pone.0081265, 2013.

4 Bonnet, S., Rodier, M., Turk-Kubo, K. A., Germineaud, C., Menkes, C., Ganachaud, A.,  
5 Cravatte, S., Raimbault, P., Campbell, E., Qu  rou  , F., Sarthou, G., Desnues, A., Maes, C.  
6 and Eldin, G.: Contrasted geographical distribution of N<sub>2</sub> fixation rates and nifH phylotypes  
7 in the Coral and Solomon Seas (southwestern Pacific) during austral winter conditions, Global  
8 Biogeochem. Cycles, 29(11), 2015GB005117, doi:10.1002/2015GB005117, 2015.

9 Bonnet, S., Berthelot, H., Turk-Kubo, K., Cornet-Barthaux, V., Fawcett, S., Berman-Frank, I.,  
10 Barani, A., Gr  gori, G., Dekaezemacker, J., Benavides, M. and Capone, D. G.: Diazotroph  
11 derived nitrogen supports diatom growth in the South West Pacific: A quantitative study using  
12 nanoSIMS, Limnol. Oceanogr., 61(5), 1549–1562, doi:10.1002/lno.10300, 2016.

13 Bonnet, S., Caffin, M., Berthelot, H. and Moutin, T.: Hot spot of N<sub>2</sub> fixation in the western  
14 tropical South Pacific pleads for a spatial decoupling between N<sub>2</sub> fixation and denitrification,  
15 PNAS, 114(14), E2800–E2801, doi:10.1073/pnas.1619514114, 2017.

16 Cabello, A. M., Cornejo-Castillo, F. M., Raho, N., Blasco, D., Vidal, M., Audic, S., de  
17 Vargas, C., Latasa, M., Acinas, S. G. and Massana, R.: Global distribution and vertical  
18 patterns of a prymnesiophyte–cyanobacteria obligate symbiosis, ISME J, 10(3), 693–706,  
19 doi:10.1038/ismej.2015.147, 2016.

20 Carpenter, E. J. and Janson, S.: Intracellular Cyanobacterial Symbionts in the Marine Diatom  
21 *Climacodium frauenfeldianum* (bacillariophyceae), Journal of Phycology, 36(3), 540–544,  
22 doi:10.1046/j.1529-8817.2000.99163.x, 2000.

23 Church, M. J., Jenkins, B. D., Karl, D. M. and Zehr, J. P.: Vertical distributions of nitrogen-  
24 fixing phylotypes at Stn Aloha in the oligotrophic North Pacific Ocean, Aquat Microb Ecol,  
25 38(1), 3–14, doi:10.3354/ame038003, 2005.

26 Church, M. J., Bj  rkman, K. M., Karl, D. M., Saito, M. A. and Zehr, J. P.: Regional  
27 distributions of nitrogen-fixing bacteria in the Pacific Ocean, Limnol. Oceanogr., 53(1), 63–  
28 77, doi:10.4319/lno.2008.53.1.0063, 2008.

29 Claustre, H. and Maritorena, S.: The Many Shades of Ocean Blue, Science, 302(5650), 1514–  
30 1515, doi:10.1126/science.1092704, 2003.

31 Cornejo-Castillo, F. M., Cabello, A. M., Salazar, G., S  nchez-Baracaldo, P., Lima-Mendez,  
32 G., Hingamp, P., Alberti, A., Sunagawa, S., Bork, P., Vargas, C. de, Raes, J., Bowler, C.,  
33 Wincker, P., Zehr, J. P., Gasol, J. M., Massana, R. and Acinas, S. G.: Cyanobacterial  
34 symbionts diverged in the late Cretaceous towards lineage-specific nitrogen fixation factories  
35 in single-celled phytoplankton, Nature Communications, 7, 11071,  
36 doi:10.1038/ncomms11071, 2016.

37 Deutsch, C., Sarmiento, J. L., Sigman, D. M., Gruber, N. and Dunne, J. P.: Spatial coupling of  
38 nitrogen inputs and losses in the ocean, Nature, 445(7124), 163–167,  
39 doi:10.1038/nature05392, 2007.

40 Dufour, P., Charpy, L., Bonnet, S. and Garcia, N.: Phytoplankton nutrient control in the  
41 oligotrophic South Pacific subtropical gyre (Tuamotu Archipelago), Mar Ecol Prog Ser, 179,  
42 285–290, doi:10.3354/meps179285, 1999.

1 Dupouy, C., Benielli-Gary, D., Neveux, J., Dandonneau, Y. and Westberry, T. K.: An  
2 algorithm for detecting *Trichodesmium* surface blooms in the South Western Tropical Pacific,  
3 *Biogeosciences*, 8, 3631–3647, doi:10.5194/bg-8-3631-2011, 2011.

4 Dyhrman, S. T. and Ruttenberg, K. C.: Presence and regulation of alkaline phosphatase  
5 activity in eukaryotic phytoplankton from the coastal ocean: Implications for dissolved  
6 organic phosphorus remineralization, *Limnol. Oceanogr.*, 51(3), 1381–1390,  
7 doi:10.4319/lo.2006.51.3.1381, 2006.

8 Dyhrman, S. T., Chappell, P. D., Haley, S. T., Moffett, J. W., Orchard, E. D., Waterbury, J. B.  
9 and Webb, E. A.: Phosphonate utilization by the globally important marine diazotroph  
10 *Trichodesmium*, *Nature*, 439(7072), 68–71, doi:10.1038/nature04203, 2006.

11 Eugster, O. and Gruber, N.: A probabilistic estimate of global marine N-fixation and  
12 denitrification, *Global Biogeochem. Cycles*, 26(4), GB4013, doi:10.1029/2012GB004300,  
13 2012.

14 Farnelid, H., Turk-Kubo, K., Muñoz-Marín, M. del C. and Zehr, J. P.: New insights into the  
15 ecology of the globally significant uncultured nitrogen-fixing symbiont UCYN-A, *Aquat*  
16 *Microb Ecol*, 77(3), 125–138, doi:10.3354/ame01794, 2016.

17 Fernandez, C., Farías, L. and Ulloa, O.: Nitrogen Fixation in Denitrified Marine Waters,  
18 *PLOS ONE*, 6(6), e20539, doi:10.1371/journal.pone.0020539, 2011.

19 Fitzsimmons, J. N., Boyle, E. A. and Jenkins, W. J.: Distal transport of dissolved  
20 hydrothermal iron in the deep South Pacific Ocean, *PNAS*, 111(47), 16654–16661,  
21 doi:10.1073/pnas.1418778111, 2014.

22 Foster, R. A. and Zehr, J. P.: Characterization of diatom–cyanobacteria symbioses on the  
23 basis of *nifH*, *hetR* and 16S rRNA sequences, *Environmental Microbiology*, 8(11), 1913–  
24 1925, doi:10.1111/j.1462-2920.2006.01068.x, 2006.

25 Foster, R. A., Subramaniam, A., Mahaffey, C., Carpenter, E. J., Capone, D. G. and Zehr, J. P.:  
26 Influence of the Amazon River plume on distributions of free-living and symbiotic  
27 cyanobacteria in the western tropical north Atlantic Ocean, *Limnol. Oceanogr.*, 52(2), 517–  
28 532, doi:10.4319/lo.2007.52.2.0517, 2007.

29 Foster, R. A., Subramaniam, A. and Zehr, J. P.: Distribution and activity of diazotrophs in the  
30 Eastern Equatorial Atlantic, *Environmental Microbiology*, 11(4), 741–750,  
31 doi:10.1111/j.1462-2920.2008.01796.x, 2009.

32 Foster, R. A., Goebel, N. L. and Zehr, J. P.: Isolation of *Calothrix Rhizosoleniae*  
33 (cyanobacteria) Strain Sc01 from *Chaetoceros* (bacillariophyta) Spp. Diatoms of the  
34 Subtropical North Pacific Ocean1, *Journal of Phycology*, 46(5), 1028–1037,  
35 doi:10.1111/j.1529-8817.2010.00885.x, 2010.

36 Garcia, N., Raimbault, P. and Sandroni, V.: Seasonal nitrogen fixation and primary  
37 production in the Southwest Pacific: nanoplankton diazotrophy and transfer of nitrogen to  
38 picoplankton organisms, *Mar Ecol Prog Ser*, 343, 25–33, doi:10.3354/meps06882, 2007.

39 Goebel, N. L., Turk, K. A., Achilles, K. M., Paerl, R., Hewson, I., Morrison, A. E., Montoya,  
40 J. P., Edwards, C. A. and Zehr, J. P.: Abundance and distribution of major groups of  
41 diazotrophic cyanobacteria and their potential contribution to N<sub>2</sub> fixation in the tropical  
42 Atlantic Ocean, *Environmental Microbiology*, 12(12), 3272–3289, doi:10.1111/j.1462-  
43 2920.2010.02303.x, 2010.

- 1 Gourdeau, L., Kessler, W. S., Davis, R. E., Sherman, J., Maes, C. and Kestenare, E.: Zonal  
2 Jets Entering the Coral Sea, *J. Phys. Oceanogr.*, 38(3), 715–725, doi:10.1175/2007JPO3780.1,  
3 2008.
- 4 Griesse, M., Lange, C. and Soppa, J.: Ploidy in cyanobacteria, *FEMS Microbiology Letters*,  
5 323(2), 124–131, doi:10.1111/j.1574-6968.2011.02368.x, 2011.
- 6 Halm, H., Musat, N., Lam, P., Langlois, R., Musat, F., Peduzzi, S., Lavik, G., Schubert, C. J.,  
7 Singha, B., LaRoche, J. and Kuypers, M. M. M.: Co-occurrence of denitrification and  
8 nitrogen fixation in a meromictic lake, Lake Cadagno (Switzerland), *Environmental*  
9 *Microbiology*, 11(8), 1945–1958, doi:10.1111/j.1462-2920.2009.01917.x, 2009.
- 10 Halm, H., Lam, P., Ferdelman, T. G., Lavik, G., Dittmar, T., LaRoche, J., D’Hondt, S. and  
11 Kuypers, M. M.: Heterotrophic organisms dominate nitrogen fixation in the South Pacific  
12 Gyre, *ISME J*, 6(6), 1238–1249, doi:10.1038/ismej.2011.182, 2012.
- 13 Hansell, D. A. and Feely, R. A.: Atmospheric Intertropical Convergence impacts surface  
14 ocean carbon and nitrogen biogeochemistry in the western tropical Pacific, *Geophys. Res.*  
15 *Lett.*, 27(7), 1013–1016, doi:10.1029/1999GL002376, 2000.
- 16 Haselkorn, R.: Heterocysts, *Annual Review of Plant Physiology*, 29(1), 319–344,  
17 doi:10.1146/annurev.pp.29.060178.001535, 1978.
- 18 Hood, R. R., Coles, V. J. and Capone, D. G.: Modeling the distribution of Trichodesmium and  
19 nitrogen fixation in the Atlantic Ocean, *J. Geophys. Res.*, 109(C6), C06006,  
20 doi:10.1029/2002JC001753, 2004.
- 21 Howard, J. B. and Rees, D. C.: Structural Basis of Biological Nitrogen Fixation, *Chem. Rev.*,  
22 96(7), 2965–2982, doi:10.1021/cr9500545, 1996.
- 23 Jacobson, M. R., Brigle, K. E., Bennett, L. T., Setterquist, R. A., Wilson, M. S., Cash, V. L.,  
24 Beynon, J., Newton, W. E. and Dean, D. R.: Physical and genetic map of the major nif gene  
25 cluster from *Azotobacter vinelandii*, *J. Bacteriol.*, 171(2), 1017–1027, 1989.
- 26 Karl, D., Letelier, R., Tupas, L., Dore, J., Christian, J. and Hebel, D.: The role of nitrogen  
27 fixation in biogeochemical cycling in the subtropical North Pacific Ocean, *Nature*, 388(6642),  
28 533–538, doi:10.1038/41474, 1997.
- 29 Karl, D. M., Björkman, K. M., Dore, J. E., Fujieki, L., Hebel, D. V., Houlihan, T., Letelier, R.  
30 M. and Tupas, L. M.: Ecological nitrogen-to-phosphorus stoichiometry at station ALOHA,  
31 Deep Sea Research Part II: Topical Studies in Oceanography, 48(8–9), 1529–1566,  
32 doi:10.1016/S0967-0645(00)00152-1, 2001.
- 33 Karl, D. M., Church, M. J., Dore, J. E., Letelier, R. M. and Mahaffey, C.: Predictable and  
34 efficient carbon sequestration in the North Pacific Ocean supported by symbiotic nitrogen  
35 fixation, *PNAS*, 109(6), 1842–1849, doi:10.1073/pnas.1120312109, 2012.
- 36 Kong, L., Jing, H., Kataoka, T., Sun, J. and Liu, H.: Phylogenetic diversity and spatio-  
37 temporal distribution of nitrogenase genes (nifH) in the northern South China Sea, *Aquat*  
38 *Microb Ecol*, 65(1), 15–27, doi:10.3354/ame01531, 2011.
- 39 Krupke, A., Musat, N., LaRoche, J., Mohr, W., Fuchs, B. M., Amann, R. I., Kuypers, M. M.  
40 M. and Foster, R. A.: In situ identification and N<sub>2</sub> and C fixation rates of uncultivated  
41 cyanobacteria populations, *Systematic and Applied Microbiology*, 36(4), 259–271,  
42 doi:10.1016/j.syapm.2013.02.002, 2013.



1 Krupke, A., Lavik, G., Halm, H., Fuchs, B. M., Amann, R. I. and Kuypers, M. M. M.:  
2 Distribution of a consortium between unicellular algae and the N<sub>2</sub> fixing cyanobacterium  
3 UCYN-A in the North Atlantic Ocean, *Environ Microbiol*, 16(10), 3153–3167,  
4 doi:10.1111/1462-2920.12431, 2014.

5 Krupke, A., Mohr, W., LaRoche, J., Fuchs, B. M., Amann, R. I. and Kuypers, M. M.: The  
6 effect of nutrients on carbon and nitrogen fixation by the UCYN-A–haptophyte symbiosis,  
7 *ISME J*, 9(7), 1635–1647, doi:10.1038/ismej.2014.253, 2015.

8 Kustka, A. B., Sañudo-Wilhelmy, S. A., Carpenter, E. J., Capone, D., Burns, J. and Sunda, W.  
9 G.: Iron requirements for dinitrogen- and ammonium-supported growth in cultures of  
10 *Trichodesmium* (IMS 101): Comparison with nitrogen fixation rates and iron: carbon ratios of  
11 field populations, *Limnol. Oceanogr.*, 48(5), 1869–1884, doi:10.4319/lo.2003.48.5.1869,  
12 2003.

13 Landolfi, A., Koeve, W., Dietze, H., Kähler, P. and Oschlies, A.: A new perspective on  
14 environmental controls of marine nitrogen fixation, *Geophys. Res. Lett.*, 42(11),  
15 2015GL063756, doi:10.1002/2015GL063756, 2015.

16 Langlois, R., Mills, M. M., Ridame, C., Croot, P. and LaRoche, J.: Diazotrophic bacteria  
17 respond to Saharan dust additions, *Marine Ecology Progress Series*,  
18 470(doi:10.3354/meps10109), 1–14, doi:Langlois, Rebecca, Mills, M. M., Ridame, Celine,  
19 Croot, Peter and LaRoche, Julie (2012) Diazotrophic bacteria respond to Saharan dust  
20 additions *Marine Ecology Progress Series*, 470 . pp. 1-14. DOI 10.3354/meps10109  
21 <<http://dx.doi.org/10.3354/meps10109>>., 2012.

22 Langlois, R. J., LaRoche, J. and Raab, P. A.: Diazotrophic Diversity and Distribution in the  
23 Tropical and Subtropical Atlantic Ocean, *Appl. Environ. Microbiol.*, 71(12), 7910–7919,  
24 doi:10.1128/AEM.71.12.7910-7919.2005, 2005.

25 Langlois, R. J., Hümmel, D. and LaRoche, J.: Abundances and Distributions of the Dominant  
26 nifH Phylotypes in the Northern Atlantic Ocean, *Appl. Environ. Microbiol.*, 74(6), 1922–  
27 1931, doi:10.1128/AEM.01720-07, 2008.

28 Law, C. S., Woodward, E. M. S., Ellwood, M. J., Marriner, A., Bury, S. J. and Safi, K. A.:  
29 Response of surface nutrient inventories and nitrogen fixation to a tropical cyclone in the  
30 southwest Pacific, *Limnol. Oceanogr.*, 56(4), 1372–1385, doi:10.4319/lo.2011.56.4.1372,  
31 2011.

32 Löscher, C. R., LaRoche, J. and Schmitz, R. A.: Underestimation of Marine Dinitrogen  
33 Fixation: A Novel Method and Novel Diazotrophic Habitats, in *Biological Nitrogen Fixation*,  
34 edited by F. J. de Bruijn, pp. 891–896, John Wiley & Sons, Inc. [online] Available from:  
35 <http://onlinelibrary.wiley.com/doi/10.1002/9781119053095.ch87/summary> (Accessed 29  
36 November 2016), 2015.

37 Luo, Y.-W., Doney, S. C., Anderson, L. A., Benavides, M., Berman-Frank, I., Bode, A.,  
38 Bonnet, S., Boström, K. H., Böttjer, D., Capone, D. G., Carpenter, E. J., Chen, Y. L., Church,  
39 M. J., Dore, J. E., Falcón, L. I., Fernández, A., Foster, R. A., Furuya, K., Gómez, F.,  
40 Gundersen, K., Hynes, A. M., Karl, D. M., Kitajima, S., Langlois, R. J., LaRoche, J., Letelier,  
41 R. M., Marañón, E., McGillicuddy, D. J., Moisander, P. H., Moore, C. M., Mouriño-  
42 Carballido, B., Mulholland, M. R., Needoba, J. A., Orcutt, K. M., Poulton, A. J., Rahav, E.,  
43 Raimbault, P., Rees, A. P., Riemann, L., Shiozaki, T., Subramaniam, A., Tyrrell, T., Turk-  
44 Kubo, K. A., Varela, M., Villareal, T. A., Webb, E. A., White, A. E., Wu, J. and Zehr, J. P.:  
45 Database of diazotrophs in global ocean: abundance, biomass and nitrogen fixation rates,

1 Earth System Science Data, 4(1), 47–73, doi:Luo, Y.-W.; Doney, S.C.; Anderson, L.A.;  
2 Benavides, M.; Berman-Frank, I.; Bode, A.; Bonnet, S.; Boström, K.H.; Böttjer, D.; Capone,  
3 D.G.; Carpenter, E.J.; Chen, Y.L.; Church, M.J.; Dore, J.E.; Falcón, L.I.; Fernández, A.;  
4 Foster, R.A.; Furuya, K.; Gómez, F.; Gundersen, K.; Hynes, A.M.; Karl, D.M.; Kitajima, S.;  
5 Langlois, R.J.; LaRoche, J.; Letelier, R.M.; Marañón, E.; McGillicuddy, D.J.; Moisander,  
6 P.H.; Moore, C.M.; Mouriño-Carballido, B.; Mulholland, M.R.; Needoba, J.A.; Orcutt, K.M.;  
7 Poulton, A.J.; Rahav, E.; Raimbault, P.; Rees, A.P.; Riemann, L.; Shiozaki, T.; Subramaniam,  
8 A.; Tyrrell, T.; Turk-Kubo, K.A.; Varela, M.; Villareal, T.A.; Webb, E.A.; White, A.E.; Wu,  
9 J.; Zehr, J.P.. 2012 Database of diazotrophs in global ocean: abundance, biomass and  
10 nitrogen fixation rates. Earth System Science Data, 4 (1). 47-73. 10.5194/essd-4-47-2012  
11 <<http://dx.doi.org/10.5194/essd-4-47-2012>>, 2012.

12 Luo, Y.-W., Lima, I. D., Karl, D. M., Deutsch, C. A. and Doney, S. C.: Data-based  
13 assessment of environmental controls on global marine nitrogen fixation, , doi:10.5194/bg-11-  
14 691-2014, 2014.

15 Marchesiello, P. and Estrade, P.: Upwelling limitation by onshore geostrophic flow, Journal  
16 of Marine Research, 68(1), 37–62, doi:10.1357/002224010793079004, 2010.

17 Martínez-Pérez, C., Mohr, W., Löscher, C. R., Dekaezemacker, J., Littmann, S., Yilmaz, P.,  
18 Lehnen, N., Fuchs, B. M., Lavik, G., Schmitz, R. A., LaRoche, J. and Kuypers, M. M. M.:  
19 The small unicellular diazotrophic symbiont, UCYN-A, is a key player in the marine nitrogen  
20 cycle, Nature Microbiology, 1, 16163, doi:10.1038/nmicrobiol.2016.163, 2016.

21 Messer, L. F., Doubell, M., Jeffries, T. C., Brown, M. V. and Seymour, J. R.: Prokaryotic and  
22 diazotrophic population dynamics within a large oligotrophic inverse estuary, Aquat Microb  
23 Ecol, 74(1), 1–15, doi:10.3354/ame01726, 2015.

24 Messer, L. F., Mahaffey, C., Robinson, C. M., Jeffries, T. C., Baker, K. G., Bibiloni Isaksson,  
25 J., Ostrowski, M., Doblin, M. A., Brown, M. V. and Seymour, J. R.: High levels of  
26 heterogeneity in diazotroph diversity and activity within a putative hotspot for marine  
27 nitrogen fixation, ISME J, 10(6), 1499–1513, doi:10.1038/ismej.2015.205, 2016.

28 Meyerhof, O. and Burk, D.: Über die Fixation des Luftstickstoffs durch Azotobacter,  
29 Zeitschrift physikalische Chemie (Abt. A), (139), 117–142, 1928.

30 Mills, M. M., Ridame, C., Davey, M., La Roche, J. and Geider, R. J.: Iron and phosphorus co-  
31 limit nitrogen fixation in the eastern tropical North Atlantic, Nature, 429(6989), 292–294,  
32 doi:10.1038/nature02550, 2004.

33 Mitsui, A., Kumazawa, S., Takahashi, A., Ikemoto, H., Cao, S. and Arai, T.: Strategy by  
34 which nitrogen-fixing unicellular cyanobacteria grow photoautotrophically, Nature, 323, 720–  
35 722, doi:10.1038/323720a0, 1986.

36 Moisander, P. H., Beinart, R. A., Voss, M. and Zehr, J. P.: Diversity and abundance of  
37 diazotrophic microorganisms in the South China Sea during intermonsoon, ISME J, 2(9),  
38 954–967, doi:10.1038/ismej.2008.51, 2008.

39 Moisander, P. H., Beinart, R. A., Hewson, I., White, A. E., Johnson, K. S., Carlson, C. A.,  
40 Montoya, J. P. and Zehr, J. P.: Unicellular Cyanobacterial Distributions Broaden the Oceanic  
41 N<sub>2</sub> Fixation Domain, Science, 327(5972), 1512–1514, doi:10.1126/science.1185468, 2010.

42 Moisander, P. H., Zhang, R., Boyle, E. A., Hewson, I., Montoya, J. P. and Zehr, J. P.:  
43 Analogous nutrient limitations in unicellular diazotrophs and Prochlorococcus in the South  
44 Pacific Ocean, ISME J, 6(4), 733–744, doi:10.1038/ismej.2011.152, 2012.

1 Moutin, T., Karl, D. M., Duhamel, S., Rimmelin, P., Raimbault, P., Mooy, V., S, B. A. and  
2 Claustre, H.: Phosphate availability and the ultimate control of new nitrogen input by nitrogen  
3 fixation in the tropical Pacific Ocean, , doi:10.5194/bg-5-95-2008, 2008.

4 Mumy, K. L. and Findlay, R. H.: Convenient determination of DNA extraction efficiency  
5 using an external DNA recovery standard and quantitative-competitive PCR, *Journal of*  
6 *Microbiological Methods*, 57(2), 259–268, doi:10.1016/j.mimet.2004.01.013, 2004.

7 Needoba, J. A., Foster, R. A., Sakamoto, C., Zehr, J. P. and Johnson, K. S.: Nitrogen fixation  
8 by unicellular diazotrophic cyanobacteria in the temperate oligotrophic North Pacific Ocean,  
9 *Limnol. Oceanogr.*, 52(4), 1317–1327, doi:10.4319/lo.2007.52.4.1317, 2007.

10 Ottesen, E. A., Young, C. R., Eppley, J. M., Ryan, J. P., Chavez, F. P., Scholin, C. A. and  
11 DeLong, E. F.: Pattern and synchrony of gene expression among sympatric marine microbial  
12 populations, *PNAS*, 110(6), E488–E497, doi:10.1073/pnas.1222099110, 2013.

13 Preston, C. M., Harris, A., Ryan, J. P., Roman, B., Iii, R. M., Jensen, S., Everlove, C., Birch,  
14 J., Dzenitis, J. M., Pargett, D., Adachi, M., Turk, K., Zehr, J. P. and Scholin, C. A.:  
15 Underwater Application of Quantitative PCR on an Ocean Mooring, *PLOS ONE*, 6(8),  
16 e22522, doi:10.1371/journal.pone.0022522, 2011.

17 Qiu, B., Chen, S. and Kessler, W. S.: Source of the 70-Day Mesoscale Eddy Variability in the  
18 Coral Sea and the North Fiji Basin, *J. Phys. Oceanogr.*, 39(2), 404–420,  
19 doi:10.1175/2008JPO3988.1, 2009.

20 Raimbault, P., Garcia, N. and Cerutti, F.: Distribution of inorganic and organic nutrients in the  
21 South Pacific Ocean - evidence for long-term accumulation of organic matter in nitrogen-  
22 depleted waters, *Biogeosciences Discussions*, 4, 3041–3087, 2007.

23 Raven, J. A.: The iron and molybdenum use efficiencies of plant growth with different  
24 energy, carbon and nitrogen sources, *New Phytologist*, 109(3), 279–287, doi:10.1111/j.1469-  
25 8137.1988.tb04196.x, 1988.

26 Robidart, J. C., Church, M. J., Ryan, J. P., Ascani, F., Wilson, S. T., Bombar, D., Marin, R.,  
27 Richards, K. J., Karl, D. M., Scholin, C. A. and Zehr, J. P.: Ecogenomic sensor reveals  
28 controls on N<sub>2</sub>-fixing microorganisms in the North Pacific Ocean, *ISME J*, 8(6), 1175–1185,  
29 doi:10.1038/ismej.2013.244, 2014.

30 Sañudo-Wilhelmy, S. A., Kustka, A. B., Gobler, C. J., Hutchins, D. A., Yang, M., Lwiza, K.,  
31 Burns, J., Capone, D. G., Raven, J. A. and Carpenter, E. J.: Phosphorus limitation of nitrogen  
32 fixation by *Trichodesmium* in the central Atlantic Ocean, *Nature*, 411(6833), 66–69,  
33 doi:10.1038/35075041, 2001.

34 Sargent, E. C., Hitchcock, A., Johansson, S. A., Langlois, R., Moore, C. M., LaRoche, J.,  
35 Poulton, A. J. and Bibby, T. S.: Evidence for polyploidy in the globally important diazotroph  
36 *Trichodesmium*, *FEMS Microbiology Letters*, 363(21), fnw244, doi:10.1093/femsle/fnw244,  
37 2016.

38 Shiozaki, T., Kodama, T. and Furuya, K.: Large-scale impact of the island mass effect through  
39 nitrogen fixation in the western South Pacific Ocean, *Geophys. Res. Lett.*, 41(8),  
40 2014GL059835, doi:10.1002/2014GL059835, 2014.

41 Short, S. M., Jenkins, B. D. and Zehr, J. P.: Spatial and Temporal Distribution of Two  
42 Diazotrophic Bacteria in the Chesapeake Bay, *Appl. Environ. Microbiol.*, 70(4), 2186–2192,  
43 doi:10.1128/AEM.70.4.2186-2192.2004, 2004.

1 Stewart, W. D. P.: Biological and Ecological Aspects of Nitrogen Fixation by Free-Living  
2 Micro-Organisms, Proceedings of the Royal Society of London. Series B, Biological  
3 Sciences, 172(1029), 367–388, 1969.

4 Subramaniam, A., Yager, P. L., Carpenter, E. J., Mahaffey, C., Björkman, K., Cooley, S.,  
5 Kustka, A. B., Montoya, J. P., Sañudo-Wilhelmy, S. A., Shipe, R. and Capone, D. G.:  
6 Amazon River enhances diazotrophy and carbon sequestration in the tropical North Atlantic  
7 Ocean, PNAS, 105(30), 10460–10465, doi:10.1073/pnas.0710279105, 2008.

8 Sukenik, A., Kaplan-Levy, R. N., Welch, J. M. and Post, A. F.: Massive multiplication of  
9 genome and ribosomes in dormant cells (akinetes) of *Aphanizomenon ovalisporum*  
10 (Cyanobacteria), ISME J, 6(3), 670–679, doi:10.1038/ismej.2011.128, 2012.

11 Taniuchi, Y., Chen, Y. L., Chen, H.-Y., Tsai, M.-L. and Ohki, K.: Isolation and  
12 characterization of the unicellular diazotrophic cyanobacterium Group C TW3 from the  
13 tropical western Pacific Ocean, Environmental Microbiology, 14(3), 641–654,  
14 doi:10.1111/j.1462-2920.2011.02606.x, 2012.

15 Thompson, A., Carter, B. J., Turk-Kubo, K., Malfatti, F., Azam, F. and Zehr, J. P.: Genetic  
16 diversity of the unicellular nitrogen-fixing cyanobacteria UCYN-A and its prymnesiophyte  
17 host, Environ Microbiol, 16(10), 3238–3249, doi:10.1111/1462-2920.12490, 2014.

18 Thompson, A. W., Foster, R. A., Krupke, A., Carter, B. J., Musat, N., Vault, D., Kuypers, M.  
19 M. M. and Zehr, J. P.: Unicellular Cyanobacterium Symbiotic with a Single-Celled  
20 Eukaryotic Alga, Science, 337(6101), 1546–1550, doi:10.1126/science.1222700, 2012.

21 Tripp, H. J., Bench, S. R., Turk, K. A., Foster, R. A., Desany, B. A., Niazi, F., Affourtit, J. P.  
22 and Zehr, J. P.: Metabolic streamlining in an open-ocean nitrogen-fixing cyanobacterium,  
23 Nature, 464(7285), 90–94, doi:10.1038/nature08786, 2010.

24 Turk-Kubo, K. A., Frank, I. E., Hogan, M. E., Desnues, A., Bonnet, S. and Zehr, J. P.:  
25 Diazotroph community succession during the VAHINE mesocosm experiment (New  
26 Caledonia lagoon), Biogeosciences, 12(24), 7435–7452, doi:10.5194/bg-12-7435-2015, 2015.

27 Van Den Broeck, N., Moutin, T., Rodier, M. and Bouteiller, A. L.: Seasonal variations of  
28 phosphate availability in the SW Pacific Ocean near New Caledonia, Mar Ecol Prog Ser, 268,  
29 1–12, doi:10.3354/meps268001, 2004.

30 Webb, E. A., Ehrenreich, I. M., Brown, S. L., Valois, F. W. and Waterbury, J. B.: Phenotypic  
31 and genotypic characterization of multiple strains of the diazotrophic cyanobacterium,  
32 *Crocospaera watsonii*, isolated from the open ocean, Environmental Microbiology, 11(2),  
33 338–348, doi:10.1111/j.1462-2920.2008.01771.x, 2009.

34 Wells, M. L., Vallis, G. K. and Silver, E. A.: Tectonic processes in Papua New Guinea and  
35 past productivity in the eastern equatorial Pacific Ocean, Nature, 398(6728), 601–604,  
36 doi:10.1038/19281, 1999.

37 Yoshikawa, C., Nakatsuka, T. and Kawahata, H.: Transition of low-salinity water in the  
38 Western Pacific Warm Pool recorded in the nitrogen isotopic ratios of settling particles,  
39 Geophys. Res. Lett., 32(14), L14615, doi:10.1029/2005GL023103, 2005.

40 Young, J. P. W.: The Phylogeny and Evolution of Nitrogenases, in Genomes and Genomics of  
41 Nitrogen-fixing Organisms, edited by R. Palacios and W. E. Newton, pp. 221–241, Springer  
42 Netherlands. [online] Available from: [http://link.springer.com/chapter/10.1007/1-4020-3054-](http://link.springer.com/chapter/10.1007/1-4020-3054-1_14)  
43 [1\\_14](http://link.springer.com/chapter/10.1007/1-4020-3054-1_14) (Accessed 29 November 2016), 2005.

1 Zehr, J. P., Waterbury, J. B., Turner, P. J., Montoya, J. P., Omoregie, E., Steward, G. F.,  
2 Hansen, A. and Karl, D. M.: Unicellular cyanobacteria fix N<sub>2</sub> in the subtropical North Pacific  
3 Ocean, *Nature*, 412(6847), 635–638, doi:10.1038/35088063, 2001.

4 Zehr, J. P., Methe, B. and Foster, R.: New Nitrogen-Fixing Microorganisms from the Oceans:  
5 Biological Aspects and Global Implications, in *Biological Nitrogen Fixation, Sustainable*  
6 *Agriculture and the Environment*, pp. 361–365, Springer Netherlands. [online] Available  
7 from: [http://link.springer.com/chapter/10.1007/1-4020-3570-5\\_87](http://link.springer.com/chapter/10.1007/1-4020-3570-5_87) (Accessed 29 November  
8 2016), 2005.

9 Zehr, J. P., Bench, S. R., Carter, B. J., Hewson, I., Niazi, F., Shi, T., Tripp, H. J. and Affourtit,  
10 J. P.: Globally Distributed Uncultivated Oceanic N<sub>2</sub>-Fixing Cyanobacteria Lack Oxygenic  
11 Photosystem II, *Science*, 322(5904), 1110–1112, doi:10.1126/science.1165340, 2008.  
12

1 Table 1. Summary of environmental conditions in the surface along the cruise transect.

| Region                                                                | Stations             | surface*<br>DIN‡<br>(μM) | surface*<br>DIP<br>(μM) | surface*<br>DiSi<br>(μM) | surface*<br>salinity<br>(PSU) | surface*<br>temp.<br>(°C) |
|-----------------------------------------------------------------------|----------------------|--------------------------|-------------------------|--------------------------|-------------------------------|---------------------------|
| Melanesian<br>archipelago<br>(MA)<br>160° E-178° E<br>170 °W - 175 °W | SD1-12<br>LDA<br>LDB | 0.02 ±<br>0.01           | 0.03 ±<br>0.02          | 0.55 ±<br>0.10           | 35.13 ±<br>0.27               | 29.33 ±<br>0.45           |
| Subtropical gyre<br>(SG)<br>160 °W- 169°W                             | SD13-<br>15<br>LDC   | 0.01 ±<br>0.01           | 0.18 ±<br>0.07          | 0.79 ±<br>0.04           | 35.12 ±<br>0.10               | 29.34 ±<br>0.18           |

2 \*5m depth, ‡NO<sub>2</sub>+NO

1 **Figure 1.** Sampling locations and the horizontal and vertical distributions of diazotrophs and  
2 the UCYN-A1 and UCYN-A2 hosts in the study area. Sampling depths are indicated as black  
3 dots (white for LD stations) and the abundances are the log *nifH* gene copies L<sup>-1</sup> for the  
4 diazotrophs and 18S rRNA gene copies L<sup>-1</sup> for the UCYN-A host lineages. The boundary  
5 between the Melanesian archipelago and subtropical gyre in the transect map is marked with a  
6 dotted line.

7 **Figure 2 a-b.** LOG10 transformed mean abundances for 4 of the diazotrophs across the  
8 transect: het-1 (blue), *Trichodesmium* (green), UCYN-A1 (yellow) and UCYN-B (purple).

9 The mean *nifH* abundance values are shown as a function of (a) percent (%) of surface  
10 irradiance and corresponding depth (m) on the secondary y-axis and (b) at each station. The  
11 corresponding depths for the percent of surface irradiance varied little, hence values were  
12 pooled and the mean is plotted. The solid black line in (b) designates the transition between  
13 the Melanesian archipelago (MA) and the subtropical gyre (SG).

**Deleted:** across the transect

**Deleted:** indicates

14 **Figure 3.** Hierarchical clustering heat map of Spearman's Rho results. The histogram shows  
15 negative (blue) and positive (green) values of correlation strength between parameters. Stars  
16 within cells mark significant correlations (p<0.05). In brackets are the two distinct groups in  
17 the WTSP.

18 **Figure 4 a-b.** Multivariate RDA bi-plot (a), depicts the variance explained by the  
19 environmental parameters and qPCR data in several dimensions. (b). A majority of the  
20 variance (y-axis: 0-4) in the dataset is explained by the RDA1 and RDA2 axes meaning that  
21 most of the variance observed is explained by the environmental parameters. The arrows are  
22 the constrained explanatory vectors with the dots representing the superimposed  
23 unconstrained response variables. PAR and nutrients (DIP and DIN) were omitted due to  
24 limited data points.

**Deleted:** which also

**Deleted:** included

**Deleted:** , where

**Deleted:** RDA1 and RDA2 are the most important

**Deleted:** As can be seen, a

**Deleted:** included

1 **Figure 5 a-d.** Meta-analysis bar graphs based on Suppl. Table 6 for a) *Trichodesmium*, b)  
2 UCYN-B, c) UCYN-A, and d) het-1. Only the significant ( $p < 0.05$ ) parameters are included  
3 and arranged as the strongest effect to the left and weakest to the right (either positive or  
4 negative). Each parameter is color coded, and the cyanobacterial diazotrophs are shades of  
5 orange and brown. Red=temperature, blue=salinity, black=depth, green=chlorophyll *a*,  
6 yellow=DIN and purple=DIP.
